1 Neutralizing Gatad2a-Chd4-Mbd3 Axis  
2 within the NuRD Complex Facilitates  
3 Deterministic Induction of Naïve Pluripotency

4  
5 Nofar Mor<sup>1\*</sup>, Yoach Rais<sup>1\*</sup>, Shani Peles<sup>1</sup>, Daoud Sheban<sup>1,2</sup>, Alejandro Aguilera-Castrejon<sup>1</sup>,  
6 Asaf Zviran<sup>1</sup>, Dalia Elinger<sup>3</sup>, Sergey Viukov<sup>1</sup>, Shay Geula<sup>1</sup>, Vladislav Krupalnik<sup>1</sup>, Mirie  
7 Zerbib<sup>1</sup>, Elad Chomsky<sup>4,5</sup>, Lior Lasman<sup>1</sup>, Tom Shani<sup>1</sup>, Jonathan Bayerl<sup>1</sup>, Ohad Gafni<sup>1</sup>,  
8 Suhair Hanna<sup>6</sup>, Jason D. Buenrostro<sup>7,8</sup>, Tzachi Hagai<sup>9</sup>, Hagit Masika<sup>10</sup>, Yehudit Bergman<sup>10</sup>,  
9 William J. Greenleaf<sup>11,12</sup>, Miguel A. Esteban<sup>13</sup>, Yishai Levin<sup>3</sup>, Rada Massarwa<sup>1</sup>, Yifat Merbl<sup>2</sup>,  
10 Noa Novershtern<sup>1#@</sup> and Jacob H. Hanna<sup>1#@%</sup>.

11 <sup>1</sup> The Department of Molecular Genetics, Weizmann Institute of Science, Rehovot 7610001, Israel.

12 <sup>2</sup> The Department of Immunology, Weizmann Institute of Science, Rehovot 7610001, Israel.

13 <sup>3</sup> The Nancy and Stephen Grand Israel National Center for Personalized Medicine (INCPM),  
14 Weizmann Institute of Science, Rehovot 7610001, Israel.

15 <sup>4</sup> Department of Biological Regulation, Weizmann Institute of Science, Rehovot 7610001, Israel

16 <sup>5</sup> Department of Computer Science, Weizmann Institute of Science, Rehovot 7610001, Israel

17 <sup>6</sup> Department of Pediatrics and the Pediatric Immunology Unit, Rambam Health Care Campus &  
18 Bruce Rappaport School of Medicine, Technion Institute of Technology, Haifa, Israel

19 <sup>7</sup> Broad Institute of MIT and Harvard, Cambridge, MA 02142, USA

20 <sup>8</sup> Harvard Society of Fellows, Harvard University, Cambridge, MA 02138, USA

21 <sup>9</sup> EMBL-European Bioinformatics Institute, Wellcome Genome Campus, Cambridge, UK

22 <sup>10</sup> Department of Developmental Biology and Cancer Research, Hebrew University Medical  
23 School, Jerusalem, Israel

24 <sup>11</sup> Department of Applied Physics, Stanford University, Palo Alto, CA, USA

25 <sup>12</sup> Chan Zuckerberg Biohub, San Francisco, CA 94158, USA

26 <sup>13</sup> Key Laboratory of Regenerative Biology, Guangzhou Institutes of Biomedicine and Health,  
27 Chinese Academy of Sciences, Guangzhou 510530, China

28

29 \*These authors contributed equally to this work as first authors. #These authors contributed equally  
30 to this work as senior corresponding authors. % Lead Contact.

31 @Correspondence can be addressed to Noa Novershtern ([noa.novershtern@weizmann.ac.il](mailto:noa.novershtern@weizmann.ac.il)), Yoach  
32 Rais ([yoach.rais@weizmann.ac.il](mailto:yoach.rais@weizmann.ac.il)) and Jacob H. Hanna ([jacob.hanna@weizmann.ac.il](mailto:jacob.hanna@weizmann.ac.il)).

33

## 34 **Abstract**

35           The Nucleosome Remodeling and Deacytelase (NuRD) complex is a co-repressive  
36 complex involved in many pathological and physiological processes in the cell. Previous studies  
37 have identified one of its components, Mbd3, as a potent inhibitor for reprogramming of somatic  
38 cells to pluripotency. Following OSKM induction, early and partial depletion of Mbd3 protein  
39 followed by applying naïve ground-state pluripotency conditions, results in a highly efficient and  
40 near-deterministic generation of mouse iPSC cells. Increasing evidence indicates that the NuRD  
41 complex assumes multiple mutually exclusive protein complexes, and it remains unclear whether  
42 the deterministic iPSC phenotype is the result of a specific NuRD sub complex. Since complete  
43 ablation of Mbd3 blocks somatic cell proliferation, here we aimed to identify alternative ways to  
44 block Mbd3-dependent NuRD activity by identifying additional functionally relevant components  
45 of the Mbd3/NuRD complex during early stages of reprogramming. We identified Gatad2a (also  
46 known as P66 $\alpha$ ), a relatively uncharacterized NuRD-specific subunit, whose complete deletion  
47 does not impact somatic cell proliferation, yet specifically disrupts Mbd3/NuRD repressive activity  
48 on the pluripotency circuit during both stem cell differentiation and reprogramming to pluripotency.  
49 Complete ablation of Gatad2a in somatic cells, but not Gatad2b, results in a deterministic naïve  
50 iPSC reprogramming where up to 100% of donor somatic cells successfully complete the process  
51 within 8 days. Genetic and biochemical analysis established a distinct sub-complex within the  
52 NuRD complex (Gatad2a-Chd4-Mbd3) as the functional and biochemical axis blocking re-  
53 establishment of murine naïve pluripotency. Disassembly of this axis by depletion of Gatad2a,  
54 results in resistance to conditions promoting exit of naïve pluripotency and delays differentiation.  
55 We further highlight context- and posttranslational dependent modifications of the NuRD complex  
56 affecting its interactions and assembly in different cell states. Collectively, our work unveils the  
57 distinct functionality, composition and interactions of Gatad2a-Chd4-Mbd3/NuRD subcomplex  
58 during the resolution and establishment of mouse naïve pluripotency.

59

60

61

62

63

## 64 **Introduction**

65 Somatic cell reprogramming has boosted a major revolution in the field of stem cell  
66 research (Takahashi and Yamanaka, 2006). This is a technically simple process in which the  
67 induction of exogenous transcription factors, classically Oct4, Sox2, Klf4 and c-Myc proteins  
68 (abbreviated as OSKM), can induce somatic cells to convert back to embryonic pluripotent stem  
69 (ESC)-like cells, termed induced pluripotent stem cells (iPSCs) (Takahashi and Yamanaka, 2006;  
70 Wernig et al., 2007). Despite the relative simplicity of this process, conventional iPSC  
71 reprogramming is typically an inefficient and a-synchronized process, where less than 0.1-15% of  
72 the donor somatic cells undergo reprogramming over a period of 2-4 weeks (Hanna et al., 2009;  
73 Liu et al., 2016). Further, while donor somatic cells reprogram with different efficiencies, it is not  
74 possible to a priori definitively predict among individual identical donor somatic cells, which and  
75 when they will convert into iPSCs (Mikkelsen et al., 2008; Singhal et al., 2010). The latter attributes  
76 have supported the conclusion that conventional iPSC formation is a stochastic process, but  
77 amenable to acceleration by supplementing additional factors (Hanna et al., 2010; Ichida et al.,  
78 2014).

79

80 Multiple pioneering studies have devised alternative reprogramming protocols, some of  
81 which are donor cell specific, where rapid and up to 100% reprogramming efficiency can be  
82 obtained within a relatively short period (Bar-Nur et al., 2014; Lujan et al., 2015; Rais et al., 2013;  
83 Di Stefano et al., 2014; Vidal et al., 2014). Our group has found that controlled and partial reduction  
84 of Mbd3, a key component of Mbd3/NuRD (Nucleosome Remodeling and Deacetylation) co-  
85 repressor complex, in concert with optimized OKSM delivery in naïve pluripotency conditions  
86 (2i/LIF, where 2i is applied 48-72 hours after reprogramming initiation, 5% O<sub>2</sub> hypoxia conditions,  
87 and Vitamin-C-containing knock-out serum replacement), can lead to highly efficient and rapid  
88 iPSC formation with up to 100% reprogramming efficiency within 8 days (Rais et al., 2013). These  
89 high efficiencies and identity of iPSC cells generated have been independently validated using  
90 Cytos single cell analysis (Lujan et al., 2015), thus ruling out over-estimations from specific  
91 fluorescent pluripotency-associated reporters. In agreement with these findings, Grummt and  
92 colleagues showed that Mbd3 over expression blocks, whereas its depletion promotes,  
93 reprogramming of MEFs and partially reprogrammed cells (Luo et al., 2013a).

94

95           One of the major mechanisms by which Mbd3/NuRD repressive activity can be co-opted  
96 is through association with ectopically expressed transcription factors. The pluripotency factor  
97 Zfp281 directly recruits Mbd3/NuRD to repress Nanog promoter activity (Fidalgo et al., 2012). By  
98 directly interacting with many additional pluripotency promoting transcription factors in addition  
99 to Zfp281, including OSKM and Sall4, Mbd3/NuRD broadly suppresses reactivation of the  
100 pluripotency circuit (Fidalgo et al., 2011; Miller et al., 2016; Rais et al., 2013; Reynolds et al.,  
101 2012).

102

103           Essential to the promotion of reprogramming upon Mbd3 depletion is an optimal  
104 incomplete depletion of NuRD activity during a critical early reprogramming window (Rais et al.,  
105 2013). Both our group and Dos Santos et al. showed that using Mbd3<sup>-/-</sup> somatic cells as starting  
106 material does not yield a boost in reprogramming (Rais et al., 2013; Dos Santos et al., 2014). In  
107 fact, as these cells can no longer proliferate *in vitro* after complete Mbd3 depletion, they trivially  
108 cannot reprogram as cell proliferation is indispensable for the iPSC process (Rais et al., 2013; Dos  
109 Santos et al., 2014). Further, the latter decrease in cell proliferation occurs prior and irrespective to  
110 OSKM induction, further supporting the notion that the inhibition of reprogramming efficiency  
111 simply results from hampering cell proliferation in the somatic state (Rais et al., 2013; Dos Santos  
112 et al., 2014), rather than establishing an epigenetic blockade for reprogramming per se. As such,  
113 Rais et al. focused mostly on using on Mbd3<sup>fllox/-</sup> cells and compared them to wild-type Mbd3<sup>+/+</sup>  
114 cells. It should be noted that several iPSC boosting strategies rely on incomplete depletion of  
115 epigenetic modulators. For instance, Caf1, Sumo2, NCoR/SMRT and Ubc9 partial, but not  
116 complete, depletion was critical for maximal boosting of iPSC efficiencies by OSKM (Borkent et  
117 al., 2016; Cheloufi et al., 2015; Zhuang et al., 2018). Collectively, the latter observations further  
118 emphasize the need to better understand the NuRD components involved in obtaining the wanted  
119 effect of achieving deterministic iPSC reprogramming, which we set out to address in this study.

120

121           The NuRD co-repressive complex can assume multiple distinct complexes based on  
122 differential subunit composition in physiological and pathological states, including development,  
123 DNA damage response and cancer metastasis (Baubec et al., 2013; Le Guezennec et al., 2006;  
124 Spruijt et al., 2016; Yildirim et al., 2011). In addition to Mbd2 and Mbd3, which form two distinct  
125 mutually exclusive Mbd2/NuRD and Mbd3/NuRD complexes (Baubec et al., 2013; Le Guezennec  
126 et al., 2006; Xie et al., 2012), other canonical subunits include: Chd3 or Chd4 (chromodomain

127 helicase DNA binding protein, also known as Mi2 $\alpha$  and Mi2 $\beta$ , respectively), which retains an  
128 ATPase activity; RbAP48 and RbAP46, which are both histone-binding proteins; Hdac1 and Hdac2  
129 (Histone deacetylase enzymes), which hold a deacetylation activity; Mta1, Mta2 and Mta3  
130 (metastasis associated protein), which can interact directly with histones tails; Gatad2a or Gatad2b  
131 (also known as P66 $\alpha$  and P66 $\beta$ , respectively) whose function remains to be fully defined (Alqarni  
132 et al., 2014). Quantitative mass spectrometry-based proteomics for Mbd3/NuRD complex has  
133 indicated that each NuRD unit contains six units of RbAP48 or RbAP46, three units of Mta1/2/3,  
134 two units of Gatad2a or Gatad2b, one unit of Chd3 or Chd4, and one unit of Hdac1 or Hdac2 (Smits  
135 et al., 2013). These results highlight the complexity and heterogeneity of NuRD complexes (Zhang  
136 et al., 2016). The latter is further complicated by the identification of context-dependent non-  
137 canonical components which include Doc-1, Zmynd8 (a zinc finger protein) and Lsd1 (Spruijt et  
138 al., 2010, 2016; Wang et al., 2009). Moreover, some of the proteins that contribute to the NuRD  
139 complex, maintain additional roles in the cell and take part in other complexes. For example, Chd4,  
140 which takes part in DNA damage response processes (Polo et al., 2010), is also part of an activating  
141 complex that includes CBP/p300 (Hosokawa et al., 2013). Likewise, Mbd3 has been reported to  
142 co-localize with aurora kinase at the mitotic spindle during mitosis and thus regulate cell cycle  
143 progression through undefined mechanisms that may possibly be NuRD independent (Sakai et al.,  
144 2002). These facts complicate assigning the outcome of perturbing components like Mbd3 or Chd4  
145 to the NuRD complex exclusively, since observed functional changes might be stemming from  
146 perturbing only a certain sub complex of NuRD with a unique conformation or altering other  
147 different complexes that share some components with NuRD (e.g. Chd4 and Hdac1) (Sakai et al.,  
148 2002; Wang et al., 2009).

149

150 In this study, we set out to identify alternative strategies to block Mbd3 dependent NuRD  
151 activity while preserving somatic cell proliferation and viability. By dissecting the mechanisms and  
152 putative components of Mbd3/NuRD Subcomplex(es) relevant during early stages of  
153 reprogramming we have identified Gatad2a-Chd4-Mbd3 as a functional and biochemical axis  
154 underlying potent inhibition of re-establishment and maintenance of naïve pluripotency.

155

156

157

158

## 159 Results

### 160 Screening for alternative components to define and perturb Mbd3/NuRD sub 161 complexes relevant for iPSC reprogramming

162 Optimized incomplete Mbd3 depletion during reprogramming has been shown to  
163 significantly improve boost iPSC formation efficiency (Luo et al., 2013a; Rais et al., 2013), but a  
164 complete reduction of this protein at the somatic stage results in cell cycle malfunctions (Rais et  
165 al., 2013) and, consequently, subsequent loss of reprogramming ability. In order to better  
166 understand the mechanisms of Mbd3 inhibitory effect on reprogramming, we adapted a transient  
167 silencing assay with siRNAs for screening other known NuRD components, aiming to identify  
168 those whose inhibition might dramatically enhance iPSC reprogramming while having minimal  
169 effect on somatic cell proliferation or viability, even if completely depleted at the protein level. To  
170 do so, we used a transgenic "secondary reprogramming" platform of MEF derived reprogrammable  
171 cell line, which already contains heterozygote TetO-inducible OKSM in the *mCol.1a* locus and  
172 heterozygote M2rtTA cassette in the *Rosa26* locus (Stadtfield et al., 2010). We chose to examine  
173 canonical NuRD complex core members (Allen et al., 2013), with Mbd3 (used as a reference  
174 positive control), the mutually exclusive Mbd2, Chd4, Chd3, Mta2, Hdac2, Gatad2a and Gatad2b  
175 components (**Fig. 1A and S1A**), and the non-canonical co-factor Zmynd8 (**Fig. S1D**). siRNA was  
176 applied 48 hours and 96 hours after DOX administration (Reprogramming initiation). Consistent  
177 with our previous results, treating the cells with siRNA for Mbd3 and Chd4, but not Chd3 or Mbd2,  
178 has significantly improved the reprogramming rate as measured 9 days after DOX addition (**Fig.**  
179 **1A-B, Fig. S1D**) (Cheloufi et al., 2015; Luo et al., 2013b; Rais et al., 2013). Remarkably, a  
180 significant and equivalent improvement in the reprogramming rate was seen in cells treated with  
181 siGatad2a (**Fig. 1A-B**). However, while depleting the NuRD components Mbd3 and Chd4  
182 compromised the cell growth rate irrespective of inducing the Yamanaka OSKM factors (**Fig. 1C**),  
183 depleting Gatad2a had a relatively smaller effect on slowing proliferation rate of MEFs, as  
184 measured in cell growth assay (**Fig. 1C**) and BrdU incorporation (**Fig. 1D-E**). No significant  
185 increase in apoptosis in MEFs was evident either following depleting Gatad2a either (**Fig. 1F**).

186

187 We next used modified regimens in order to evaluate the possibility of further optimizing  
188 the process, by repressing NuRD components at earlier time points during reprogramming. Chd4,  
189 Gatad2a, Chd3 and Mbd3 targeted siRNAs and siScramble were applied in two different

190 transfection cycles: the first transfection cycle started in somatic cells before OKSM induction (pre-  
191 DOX), and the second one started 24 hours after reprogramming was initiated (post-DOX). In both  
192 regimens, a second transfection took place 48 hours after the first one in order to maintain optimal  
193 knockdown levels. siRNA mediated knockdown of Mbd3 and Chd4 achieved improved  
194 reprogramming only in the second cycle of transfection (post-DOX), while the siRNA transfection  
195 which started before OKSM induction (pre-DOX) had a negative effect on the reprogramming  
196 process, comparing to siScramble (**Fig. 1G-H**). The latter is consistent with previous reports  
197 indicating that complete ablation of Mbd3 in the earlier somatic cell-like states hinders  
198 reprogramming due to higher sensitivity in blocking somatic cell proliferation (Rais et al., 2013;  
199 Dos Santos et al., 2014) which is essential for iPSC reprogramming (Hanna et al., 2009). However,  
200 as Gatad2a knockdown did not profoundly alter cell proliferation or viability, comparable  
201 enhancement in iPSC reprogramming rate was obtained in both transfection regimens (**Fig. 1G-H**).  
202 iPSC lines acquired following siRNA treatment for Gatad2a were pluripotent as evident by uniform  
203 expression of pluripotency markers by immunostaining and generation of mature teratomas *in vivo*  
204 (**Supplementary Fig. S1B-C**). Taken together, these findings underscore Gatad2a as a potential  
205 alternative and technically more flexible way to inhibit Mbd3/NuRD repressive activity (i) early in  
206 the reprogramming process and (ii) without profoundly blocking somatic cell proliferation and  
207 viability when completely depleted.

208

## 209 **Gatad2a ablation facilitates deterministic iPSC reprogramming by OSKM**

210 We next set out to more accurately examine the effect of abolishing Gatad2a during iPSC  
211 reprogramming by establishing multiple sets of genetically modified Gatad2a knock out (Gatad2a-  
212 KO or Gatad2a<sup>-/-</sup>) secondary reprogrammable lines (Hanna et al., 2008; Hussein et al., 2014;  
213 Wernig et al., 2008) that were generated from defined parental isogenic Gatad2a<sup>+/+</sup> wild-type (WT)  
214 cell lines. We first generated two different Gatad2a<sup>+/+</sup> secondary reprogramming cell lines (**Fig. 2A**  
215 **and S2A**): i) WT primary MEFs were reprogrammed with viruses encoding FUW-M2rtTA and  
216 STEMCCA-OKSM. A randomly picked iPSC clone was selected and rendered transgenic for a  
217 constitutively expressed mCherry allele (to allow tracking of viable somatic cells) and a stringent  
218 ΔPE-Oct4-GFP transgenic reporter for naïve pluripotency (Gafni et al., 2013; Rais et al., 2013). An  
219 isolated clone was then used as a WT control and as the source for an isogenically matched Gatad2a<sup>-</sup>  
220 <sup>-/-</sup> null cell line. Notably, CRISPR/Cas9 was used to generate Gatad2a<sup>-/-</sup> iPSCs/ESCs (**Fig. 2B-C**).  
221 Gatad2a<sup>-/-</sup> clones were obtained with ~40% successful targeting efficiency and were validated by

222 PCR and Western blot analysis for ablation of *Gatad2a* (**Fig. S2B-D**). ii) Reprogrammable  
223 *Gatad2a*<sup>+/+</sup> line was established by deriving an ES line from mice carrying *Rosa26-M2rtTA*<sup>+/-</sup>;  
224 *m.Col1a-TetO-OKSM*<sup>+/-</sup>; *OG2-GOF18-ΔPE-Oct4-GFP* allele (Boiani et al., 2004), and was then  
225 subjected to CRISPR/Cas9 *Gatad2a* KO strategy (**Fig. S2**). Isogenic WT and *Gatad2a*<sup>-/-</sup> transgenic  
226 reprogrammable iPSCs/ESCs were injected into host blastocysts, and secondary MEFs were  
227 isolated from E12.5 embryos and were subjected to puromycin selection to eliminate non-  
228 transgenic host derived MEFs (**Fig. 2D and S3A**). In all experiments, isogenic sets were used side  
229 by side for comparative analysis (**Fig. 2A**). As previously optimized for *Mbd3*<sup>fllox/-</sup> donor cells (Rais  
230 et al., 2013), iPSC reprogramming was done in mES medium supplemented with DOX and 5% O<sub>2</sub>  
231 conditions for the first three days, followed by changing to 20% O<sub>2</sub> and knockout serum  
232 replacement (KSR) based medium supplemented medium with 2i/LIF (**Fig. 2A**). For all different  
233 lines tested, a profound improvement in the reprogramming rate and efficiency was observed, as  
234 the *Gatad2a*-KO cells achieve high rates alkaline-phosphatase positive colonies in 6 days only (**Fig.**  
235 **2E**). Reprogramming rates were also measured by FACS analysis by quantification of *ΔPE-Oct4-*  
236 *GFP* positive cells every 24 hours for 8 days without cell splitting or passaging to avoid any  
237 selective biases (**Fig. 2F, Fig. S3B**). Reminiscent of the kinetics measured in *Mbd3*<sup>fllox/-</sup> systems  
238 (Rais et al., 2013), *ΔPE-Oct4-GFP* starts to appear after 3 days of reprogramming, and its rates  
239 ascending prominently on day 4 and reach >95% after 8 days of OSKM induction (**Fig. 2E, Fig.**  
240 **S3B**).

241

242 We next utilized the fact that these lines harbor constitutive expression of nuclear mCherry  
243 marker that allows detection of viable somatic cells after single cell plating, and quantified  
244 reprogramming efficiency of MEFs at the single cell level. *Gatad2a*-KO MEF reproducibly yielded  
245 up to 100% iPSC cell derivation efficiency by day 8 in two independent isogenic systems tested, as  
246 determined by *ΔPE-Oct4-GFP* expression in iPSC colonies obtained (**Fig. 2G**). When isogenic  
247 *Gatad2a* WT cells reprogrammed under identical conditions, no more than 10% of clones  
248 reactivated *ΔPE-Oct4-GFP* in 8 days (**Fig. 2G**). In order to validate expression of pluripotency  
249 network, 96 well plates were fixed at day 8 and all wells were co-stained and found positive for  
250 endogenous *Nanog/SSEA-1* and *Oct4/Esrrb* pluripotency marker expression in all clones tested at  
251 day 8, thus validating the authenticity of iPSC identity and reporters used herein (**Fig. S3C**). Similar  
252 reprogramming efficiencies were observed upon reprogramming of other cell types including  
253 macrophages, neural progenitor cell (NPCs) and Pro-B cells (**Fig. 2H**).



254 We then applied microscopic live imaging of the reprogramming dynamics (Rais et al.,  
255 2013), by seeding somatic cells constitutively labeled with mCherry marker, and their  
256 reprogramming was evaluated by  $\Delta$ PE-Oct4-GFP reactivation (**Fig. 3, Fig. S4 and Supplementary**  
257 **Video 1-2**). Time-lapse measurements showed a dramatic increase in ES-like colony formation in  
258  $Gatad2a^{-/-}$ , 6 days after DOX induction: more than 98% of  $Gatad2a^{-/-}$  clonal populations reactivated  
259  $\Delta$ PE-Oct4-GFP pluripotency marker, compared to 15% in isogenic WT control cells,  
260 reprogrammed in identical growth conditions. Notably, while the most efficient conditions of  
261 reprogramming  $Gatad2a^{-/-}$  and  $Mbd3^{\text{flox/-}}$  cells involve applying 2i after 3 days (up to 100% at day  
262 8),  $Gatad2a^{-/-}$  cells reprogram with dramatically higher efficiency at day 7 (40-70%) in all different  
263 conditions tested, compared to their isogenic WT controls (**Fig. S3D**). Following  $Gatad2a$   
264 depletion, we were not able to isolate stable partially reprogrammed cells that did not reactivate  
265  $\Delta$ PE-Oct4-GFP and could be stably expanded *in vitro* as typically can be obtained from OSKM  
266 transduced wild-type somatic cells (Borkent et al., 2016; Carey et al., 2010; Rais et al., 2013). The  
267 residual 1-15%  $\Delta$ PE-Oct4-GFP negative colonies seen at day 6 in  $Gatad2a^{-/-}$  cells, rapidly become  
268 GFP+ within 1-3 days of continued reprogramming (**Fig. S3E**).

269

270 Twelve  $Gatad2a^{-/-}$  derived iPSC lines from each of the two described secondary  
271 reprogramming systems were established independently of DOX and passaged before subsequent  
272 functional characterization. All randomly tested clones stained positive for alkaline phosphatase  
273 (AP), Oct4 and Nanog pluripotency markers (**Fig. S3F**). Mature teratomas and high contribution  
274 chimeras were obtained from multiple iPSC clones consistent with adequate reprogramming to  
275 ground state pluripotency (**Fig. S5A-B**). To evaluate the molecular extent and authenticity of  
276 reprogramming in OSKM transduced  $Gatad2a^{+/+}$  and  $Gatad2a^{-/-}$  cell, we conducted global gene  
277 expression analysis on bulk donor MEFs at days 1-8 following DOX induction without cell  
278 passaging or sorting based on pluripotency reporter expression and compared them to iPSC and  
279 ESC lines. For all mouse iPSC reprogramming experiments dedicated for genomic analysis,  
280 irradiated human foreskin fibroblasts were used as feeder cells, as any sequencing input originating  
281 from the use of human feeder cells cannot be aligned to the mouse genome and is therefore omitted  
282 from the analysis.  $Gatad2a^{-/-}$  somatic cells and not  $Gatad2a^{+/+}$  cells clustered separately from donor  
283 fibroblasts already at day 1 following DOX (**Fig. 4A-B**). Importantly,  $Gatad2a^{-/-}$  MEFs cluster  
284 together with WT MEFs, thus ruling out a possibility of dramatically different transcriptional state  
285 before DOX (**Fig.4A-B, Fig. S5C, Fig S2E**). Remarkably, by day 8  $Gatad2a^{-/-}$  cells were  
286 transcriptionally indistinguishable from multiple ESC and sub cloned established iPSC lines (**Fig.**

287 **4A-B**). Key regulators of mouse fibroblasts or mouse pluripotency were similarly expressed in  
288 *Gatad2a*<sup>-/-</sup> and *Gatad2a*<sup>+/+</sup> cell lines (**Fig. 4A-B, Fig. S5C**). Genome wide chromatin mapping for  
289 H3K27acetyl (K27ac) by Chromatin Immunoprecipitation followed by sequencing analysis (ChIP-  
290 seq), also confirmed that by day 8, only *Gatad2a*<sup>-/-</sup> transduced MEFs had assumed an ESC-like  
291 chromatin profile (**Fig. 4C**). Genome wide DNA methylation mapping by whole genome bisulfite  
292 sequencing (WGBS) confirmed that the *Gatad2a*<sup>-/-</sup> polyclonal population of MEFs and iPSCs are  
293 positively correlated to their WT counterparts (**Fig. 4C**). More extensive comparison to *Mbd3*<sup>fllox/-</sup>  
294 system, shows they are also comparable in their RNA-Seq, H3K27ac and WGBS to *Mbd3*<sup>fllox/-</sup>  
295 counterpart samples (Zviran et al., 2017)(Accompanying related manuscript with PDF co-  
296 submitted). Moreover, FISH experiments for asynchronous DNA replication show that cells  
297 undergoing reprogramming start from asynchronous replication (in their somatic state) but adopt  
298 synchronous replication pattern which suits ground state naïve pluripotent stem cells (Masika et  
299 al., 2017) as early as day 5 (**Fig. S5H**), coinciding with the robust reactivation of  $\Delta$ PPE-Oct4-GFP  
300 reporter in the massive majority of donor cells. Collectively, the above results indicate that *Gatad2a*  
301 depletion following OSKM induction in optimized 2i/LIF containing conditions yields authentic  
302 molecular reestablishment of the ground state of pluripotency in the entire population of donor  
303 somatic cells and their progeny.

304

305 Of note, inhibiting *Gatad2a* expression was not sufficient to induce iPSC formation in the  
306 absence of exogenous OSKM overexpression in somatic cells (**Fig. S5D**). *Gatad2a* ablation did not  
307 replace exogenous OSK expression neither to give rise to iPSCs and the presence of exogenous c-  
308 Myc was essential to obtain iPSCs at up to 100% efficiency following factor transduction within 9  
309 days (**Fig. S5D**). Last, in order to validate the specificity of *Gatad2a* function, we reconstituted  
310 *Gatad2a* expression in *Gatad2a*<sup>-/-</sup> MEFs using viral infection of *Gatad2a* under FUW-TetO  
311 promoter. Subsequent reprogramming resulted in a significant decrease of reprogramming  
312 efficiency comparing to *Gatad2a*<sup>-/-</sup> cells (**Fig. 4D and Fig. S5E-G**). Notably, *Gatad2b* over  
313 expression failed to achieve the same phenotype and had no influence on reprogramming efficiency  
314 of *Gatad2a*<sup>-/-</sup> MEFs. These results suggest a non-redundant role for *Gatad2a* which cannot be  
315 compensated for by *Gatad2b* (**Fig. 4D and Fig. S5E-G**). The latter is consistent with recent  
316 observation that *Gatad2a* and *Gatad2b* form mutually exclusive complexes (Spruijt et al., 2016)  
317 and the fact that *Gatad2a*<sup>-/-</sup> mice are embryonically lethal by E8.5-E10.5 despite of intact residual  
318 *Gatad2b* expression (Marino and Nusse, 2007).

319 Finally, while *Gatad2a*<sup>-/-</sup> MEFs had epigenetic and functional features of somatic WT  
320 MEFs (including RNA-seq, WGBS and H3K27ac) (**Fig. 4A-C, Fig S2E**), in order to fully exclude  
321 a possibility that a boost in iPSCs efficiency is partially reliant on incomplete differentiation of  
322 somatic cells generated while *Gatad2a* was completely absent during the differentiation process,  
323 we generated *Gatad2a*<sup>fl<sup>ox</sup>/fl<sup>ox</sup></sup> Secondary iPSCs (**Fig. 4E**). Subsequently, the safe harbor *Rosa26*  
324 locus was correctly targeted with a knock-in CRE-Ert allele. These cells were microinjected into  
325 host chimeras and secondary *Gatad2a*<sup>fl<sup>ox</sup>/fl<sup>ox</sup></sup> MEFs were derived and used for reprogramming  
326 efficiency measurement with the presence or absence of Cre recombinase or Tamoxifen (4OHT)  
327 which were both efficient in ablating *Gatad2a* protein expression (**Fig. 4F-G**). Reprogramming  
328 efficiency and kinetics from Tat-CRE (HTNC) treated cells (*Gatad2a*<sup>Δ/Δ</sup>) were indistinguishable  
329 from *Gatad2a*<sup>-/-</sup> cells, while reprogramming efficiency of isogenic paternal isogenic *Gatad2a*<sup>fl<sup>ox</sup>/fl<sup>ox</sup></sup>  
330 somatic cells were below 18% (**Fig. 4H**).

331

### 332 ***Gatad2a* restrains naïve pluripotency maintenance and lineage priming of** 333 **mouse ESCs**

334 *Mbd3* has been shown to inhibit naïve pluripotency expression, and in its absence, mouse  
335 ESCs become more stable under naïve conditions and exhibit significant kinetic delay to undergo  
336 differentiation (Kaji et al., 2006, 2007; Reynolds et al., 2012). In order to evaluate *Gatad2a*  
337 influence on murine naïve pluripotency maintenance, *Gatad2a* was knocked out in a murine ESC  
338 line harboring the OG2 ΔPE-Oct4-GOF18-GFP transgenic reporter that specifically marks the  
339 naïve pluripotent state (Bao et al., 2009; Yoshimizu et al., 1999) (**Fig. 5A**). The *Gatad2a*<sup>-/-</sup> ESC  
340 stained positive for all pluripotency markers tested (**Fig. 5B**) and exhibited a normal protein  
341 expression profile (**Fig. 5C**), suggesting that *Gatad2a* is dispensable for naïve pluripotency  
342 maintenance. ΔPE-Oct4-GFP reporter levels were similar in WT and *Gatad2a*-KO, as shown by  
343 FACS analysis and representative pictures of colonies from both cell lines (**Fig. 5A-B, D**). *Gatad2a*<sup>-/-</sup>  
344 <sup>-/-</sup>, but not WT cells, could be maintained in serum only (FBS only) conditions without  
345 supplementation of LIF for >12 passages without any compromise in ΔPE-Oct4-GFP expression  
346 levels (**Fig. 5D**), consistent with an increase in their naïve pluripotency stability and similar to  
347 previously obtained results with *Mbd3*<sup>-/-</sup> murine ESCs (Kaji et al., 2007; O'Shaughnessy-Kirwan  
348 et al., 2015; Rais et al., 2013).

349

350 We next set out to find whether *Gatad2a* deletion has a functional effect on the cell ability  
351 to undergo lineage priming and differentiation, by examining conversion of naïve ESC into primed  
352 Epiblast like cells (EpiLC) *in vitro* (Hayashi et al., 2011) after 60 hours expansion in primed  
353 *Fgf2/Activin A* defined conditions (**Fig. 5E**). *Gatad2a*<sup>+/+</sup> cells showed a rapid decrease in  $\Delta$ PE-  
354 Oct4-GFP signal and lost their domed-like shape morphology, while *Gatad2a*<sup>-/-</sup> cells retained their  
355 naïve morphology and had a negligible decrease in  $\Delta$ PE-Oct4-GFP following 60h of priming in  
356 bFGF/Activin A conditions (**Fig. 5E**). Consistently, RT-PCR analysis revealed that conversion of  
357 *Gatad2a*<sup>-/-</sup> caused a smaller downregulation of naïve pluripotency related genes such as *Esrrb*,  
358 *Nanog*, *Rex1* and *Klf4*, compared to isogenic wild-type control cells (**Fig. 5F, Fig. S6A**). In  
359 addition, KO cells were deficient in up-regulating early development genes such as *Otx2* and *Fgf5*  
360 (**Fig. 5F, Fig. S6A**). Notably, this delay in undergoing priming is not infinite and is resolved later  
361 on, as *Gatad2a*<sup>-/-</sup> are able to differentiate despite of the latter delay and form mature teratomas upon  
362 microinjection into immune deficient mice *in vivo* (**Fig. 5G**) as similarly described for *Chd4*<sup>-/-</sup>,  
363 *Mbd3*<sup>-/-</sup> and hypomorphic *Mbd3*<sup>fl<sup>ox</sup>/-</sup> ESCs. Collectively, these observed phenotypes resemble those  
364 previously validated with *Mbd3* and *Chd4* depleted naïve ESCs (Kaji et al., 2007; O’Shaughnessy-  
365 Kirwan et al., 2015; Rais et al., 2013), and once again underlines the common functionality of these  
366 three NuRD components.

367

368 To evaluate whether *Gatad2a* depletion promotes reversion of primed cells to naïve  
369 pluripotency, Epiblast stem cells (EpiSCs) (Brons et al., 2007; Greber et al., 2010; Najm et al.,  
370 2011) were established and validated from *Gatad2a*<sup>fl<sup>ox</sup>/fl<sup>ox</sup></sup> ESCs that harbor naïve specific OG2  $\Delta$ PE-  
371 Oct4-GFP reporter (**Fig. 5H**). In comparison to isogenic *Gatad2a*<sup>fl<sup>ox</sup>/fl<sup>ox</sup></sup> EpiSCs, single cell clonal  
372 analysis for epigenetic reversion of EpiSCs demonstrated >95%  $\Delta$ PE-Oct4-GFP+ single cell  
373 reversion efficiency in *Gatad2a* depleted cells (**Fig. 5I**). These efficiencies are similar to those  
374 obtained following reversion of *Mbd3*<sup>fl<sup>ox</sup>/-</sup> EpiSCs (Rais et al., 2013). Further, deleting *Gatad2a* in  
375 EpiSCs while maintaining them in primed *Fgf2/Activin A* conditions for extended passages (>10)  
376 (**Fig. S6B**) partially compromised their primed identity towards naivety. While  $\Delta$ PE-Oct4-GFP  
377 remained negative in both early and late passage *Gatad2a* <sup>$\Delta\Delta$</sup>  cells expanded in primed conditions,  
378 late passage *Gatad2a* <sup>$\Delta\Delta$</sup>  had reduced expression of primed markers such as *Brachyury* (T) and  
379 upregulated expression of *Nanog* and *Esrrb* naïve markers in comparison to early passage  
380 *Gatad2a* <sup>$\Delta\Delta$</sup>  cells (P3-5) (**Fig. S6C-D**). These results directly demonstrate that reduction of *Gatad2a*  
381 protein levels compromises the identity of the primed pluripotent state and renders nearly complete

382 reversion of all donor primed EpiSCs to ground state pluripotency upon exposure to robust naïve  
383 pluripotency conditions.

384

### 385 **Mbd3, Gatad2a and Chd4 form a key molecular axis within the NuRD complex** 386 **that restrains naïve pluripotency**

387 Gatad2a inhibition was a key and dominant contributor to the radically efficient regression  
388 towards naïve pluripotency reported herein (**Fig. 2**). Thus, we aimed to define the mechanisms by  
389 which Gatad2a influences Mbd3/NuRD to facilitate inhibition of naïve iPSC reprogramming. In  
390 order to do this, we established an ESC line that harbors a DOX inducible allele of 2XFlag-Mbd3  
391 (*Rosa26-M2RtTA<sup>+/+</sup> Col1a:TetO-2XFlag-Mbd3<sup>+/+</sup>*) (**Fig. S2Aiii**) (Hochedlinger et al., 2005).  
392 Subsequently, we generated an isogenic Gatad2a<sup>-/-</sup> clone by CRISPR/Cas9 mediated targeting (**Fig.**  
393 **S2**). In order to estimate the influence of Gatad2a-KO on Mbd3 interactome we applied LC-MS/MS  
394 analysis of Mbd3 protein interactions in Gatad2a-KO line and its isogenic WT control. When  
395 focusing the analysis on NuRD components, we noted that all canonical members of the NuRD  
396 complex were identified in both samples in high abundance and high correlation, except for  
397 Gatad2a and Chd4, which were missing from the Gatad2a-KO sample (**Fig. 6A**).

398

399 In light of the above, we set out to establish whether and how Mbd3, Chd4 and Gatad2a  
400 constitute a biochemical axis within the NuRD complex. Indeed, co-immunoprecipitation (Co-IP)  
401 analysis for Mbd3 in ESCs and MEFs showed that in the absence of Gatad2a, Chd4 could not be  
402 immunoprecipitated with Mbd3 (**Fig. 6B**). The latter principle was validated following IP of  
403 endogenous Chd4 in MEFs expressing OSKM undergoing reprogramming, showing that upon  
404 depletion of Gatad2a via siRNA, Chd4 can no longer directly interact with Mbd3 (**Fig. 6C**).  
405 Transgenic ectopic reconstitution of Gatad2a in Gatad2a<sup>-/-</sup> MEFs (KO + Gatad2a-Tg), reestablished  
406 specific interaction between Mbd3 and Chd4 (**Fig. 6D**).

407

408 We next wanted to determine which domains of Gatad2a and Mbd3 regulate this specific  
409 interaction. Mbd3, which is a member of the Methyl-binding-domain (MBD) proteins retains two  
410 domains – the Methyl binding domain, which has been shown to mediate its interaction with  
411 transcription factors like OSKM during iPSC reprogramming (Rais et al., 2013), and the highly

412 conserved Coiled coil region whose precise function in Mbd3 is not fully characterized (**Fig. 6E**).  
413 2xFlag-tagged Mbd3 (2XFlag-WT-Mbd3) expression vector was generated together with two  
414 mutant versions of Mbd3, one of which lacks the coiled-coil region (2xFlag- $\Delta$ CCR-Mbd3) and the  
415 other one lacks the Methyl binding domain (2XFlag- $\Delta$ MBD-Mbd3) (**Fig. 6F**). Co-IP experiments  
416 showed that while the elimination of the coiled-coil region of Mbd3 (2XFlag- $\Delta$ CCR-Mbd3) does  
417 not interrupt binding to reprogramming factors (e.g. Klf4), it does prevent exclusively Gatad2a and  
418 Chd4 binding (**Fig. 6G**). On the contrary,  $\Delta$ MBD-Mbd3 was unable to bind Klf4, but maintained  
419 its ability to bind to different NuRD components, like Gatad2a and Chd4, as similarly shown in  
420 previous publications (Rais et al., 2013) (**Fig. 6G**). Reconstitution of Mbd3<sup>fllox/-</sup> cells with  $\Delta$ CCR-  
421 Mbd3 transgene, which is missing the coiled-coil domain, did not inhibit reprogramming  
422 efficiency, consistent with its inability to recruit Chd4 (**Fig. 6H-I**).

423

424 In order to further characterize Mbd3-Gatad2a-Chd4 axis, we tried to interrupt the axis  
425 assembly by creating a “competition” over the binding site of Gatad2a to Mbd3. We over-expressed  
426 Gatad2a-coiled coil region (Gatad2a-CCR1) in a truncated construct (**Fig. S7A-B**) or as a short  
427 peptide (**Fig. S7A, C-D**) together with 2XFlag-Mbd3. Indeed, the over-expression of Gatad2a  
428 Coiled-coil region reduced the endogenous Gatad2a and Chd4 binding to Mbd3 (**Fig. S7B-D**).  
429 Finally, overexpression of the MBD domain of Mbd3 as an independent peptide directly interacted  
430 with Oct4 and Hdac2, showing again that the MBD is required and sufficient for the binding of the  
431 pluripotency factors (Rais et al., 2013), but not to Gatad2a and Chd4 (**Fig. S7E**). Collectively these  
432 results establish a function of Mbd3-CCR as the mediator of Gatad2a and Chd4 binding, and  
433 corresponds with previous publications which showed that the highly conserved Mbd2-CCR can  
434 form a heterodimer with Gatad2a and thus to modulate the complex’s function (Gnanapragasam et  
435 al., 2011).

436

### 437 **Interactions and assembly of Gatad2a-Mbd3/NuRD are context dependent and** 438 **can be modified post-translationally.**

439 We and others have previously shown that the reprogramming factors (OSKM) factors  
440 directly interact and co-IP with Mbd3/NuRD complex following reprogramming initiation in  
441 somatic cells (van den Berg et al., 2010; Rais et al., 2013). By assessing these interactions in other  
442 cell states (representing different differentiation conditions), we noted that some of these

443 interactions do not exist in naïve ESCs expanded in 2i/LIF conditions despite abundant expression  
444 of Oct4 and Klf4 (**Fig. 7A**) as well as expression of all known NuRD components under these  
445 conditions (**Fig. 7A**). However, upon brief 48h priming of naïve conditions and turning them into  
446 EpiLCs (**Fig. 7A**) or long term EpiSCs (**Fig. 7B**), establishment interactions with Oct4/Klf4 and  
447 Mbd3/NuRD became rapidly and strongly evident. These results are consistent with the notion that  
448 Mbd3/NuRD promotes ESC differentiation (Reynolds et al., 2012; Dos Santos et al., 2014; Yildirim  
449 et al., 2011), indicating that this propensity collates with increased NuRD-TF interactions upon  
450 pluripotency priming, or in somatic cell state conditions experiencing “non-physiologic” ectopic  
451 expression of pluripotency factors like OSK (**Fig. 7A-B**).

452 While the nature and molecular basis of these context specific interaction remain to be  
453 explored, we asked whether enhancing naïve pluripotency conditions by blocking other signaling  
454 pathways may deplete certain Mbd3-Chd4-Gatad2a/Complex components. Remarkably, of the  
455 several small molecule inhibitors previously published to promote naïve ESC maintenance (SRCi,  
456 TGFRI, PKCi) (Dutta et al., 2011; Han et al., 2010; Shimizu et al., 2012), the broad spectrum PKC  
457 inhibitor Go6983 dramatically depleted Mbd3 protein expression within 24 hours of treatment in  
458 different naïve conditions (**Fig. 7C-D, S8A-C**). The effect was not mediated by another PKC  
459 inhibitor, GF109203X (GFX), that does not target atypical PKC isoforms (**Fig. S8D**). Indeed,  
460 siRNA for the atypical PKCzeta isoform recapitulated partially the depletion seen in Mbd3  
461 observed in ESCs (**Fig. S8E**). This effect was seen in the context of pluripotent cells but not  
462 significantly when Go6983 was applied on a variety of somatic cells (**Fig. S8F**) suggesting that the  
463 Mbd3 depletion effect was not by specific and direct action of this small molecule on the NuRD  
464 complex (equivalent to example where ERKi depletes Uhrf1 and Dnmt3,a,b and l in mouse ESCs  
465 but not in somatic cells (Habibi et al., 2013)(Leitch et al., 2013). Finally, this reduction in Mbd3  
466 protein was not accompanied by a change of Mbd3 mRNA transcript levels (**Fig. S8G**), suggesting  
467 rapid regulation at the post-translational level that will be of future interest for biochemical  
468 dissection.

469 We next tested the ability of Go6983 to boost iPSC efficacy formation from WT secondary  
470 reprogrammable MEFs. We observed an increase of reprogramming efficiency up to 45%  
471 compared to DMSO treated cells (**Fig S8H-I**). It is possible that the efficiencies were not as high  
472 to those seen in genetically modified MEF cells (**Fig. 2**), possibly because Go6983 does not deplete  
473 Mbd3 in somatic cells and only later after initiation of the process when cells start becoming ES-  
474 like (**Fig. S8 F, H**) (early stages of reprogramming when MEF identity is still maintained), which  
475 helps further boost reprogramming efficiency. However, in the context of EpiSC reversion, we

476 were able to obtain up to 85% single cell EpiSC reversion efficiency in combination with  
477 LIF/ERKi/ROCKi/NOTCHi Vitamin C were supplemented with Go6983, while without PKCi or  
478 when using SRC instead, reversion efficiencies remained below ~25% (**Fig. 7E**). Finally, while  
479 WT ESCs cannot maintain their naïve pluripotency in N2B27 LIF unless an additional component  
480 like 2i or PKCi are provided (Rajendran et al., 2013; Ying et al., 2003, 2008), *Gatad2a*<sup>-/-</sup> ESCs  
481 were fully stable for many passages in N2B27 LIF only conditions (in the absence of Go6983) as  
482 determined by the stringent naïve specific OG2 ΔPE-Oct4-GFP reporter (**Fig. 7F**). The latter results  
483 underscore a previously unidentified link between naïve PSC booster Go6983 and depletion of  
484 Mbd3/NuRD in the context of murine pluripotency and reprogramming.

485

486         Given the above result showing context- and signaling dependent influence on NuRD  
487 complex stability and function, we wondered whether some of other recently identified genetic  
488 perturbations shown to boost iPSC reprogramming efficiency had direct or indirect effects on  
489 NuRD assembly and its ability to be loaded on the chromatin. While we so far have not seen  
490 alteration in Mbd3/NuRD function following C/EBP induction in B cells (Di Stefano et al., 2016)  
491 or Dnmt1 inhibition in pre-iPSCs (Mikkelsen et al., 2008) (data not shown), we analyzed the effect  
492 of depleting global SUMOylation on iPSC reprogramming as it was shown to be an efficient  
493 booster (Borkent et al., 2016; Cheloufi et al., 2015). Moreover, we took special focus on  
494 SUMOylation since SUMOylation on *Gatad2a* protein in NIH3T3 cells (**Fig. S8J**) has been shown  
495 to be essential for its direct binding to Hdac1 within NuRD (Gong et al., 2006). Here, we identified  
496 a direct link between global inhibition of SUMOylation that boosts iPSC efficiency, to NuRD  
497 stability and assembly in the context of pluripotent cell reprogramming, specifically through  
498 *Gatad2a*-Chd4 interaction. We validated that knockdown of *Ubc9* boosts WT MEF reprogramming  
499 up to ~40% following OSKM induction as previously reported (**Fig S8I**). The ability of Chd4 to  
500 Co-IP with *Gatad2a* was specifically decreased following *Ubc9* knockdown in ES, but not in  
501 control shRNA used (**Fig. 7G**). Similar results were obtained when using a specific small molecule  
502 inhibitor (2-D08) to inhibit SUMOylation (**Fig. S8K**). Cellular fractionation, followed by  
503 chromatin isolation in control vs. *Ubc9* depleted samples undergoing pluripotency reprogramming  
504 showed specific depletion of *Gatad2a*/Mbd3 from the purified chromatin fraction, but not DNMT1  
505 or Mta2 (used as controls) (**Fig. 7H, Fig S8L**), supporting that *Gatad2a*-Mbd3/NuRD assembly and  
506 loading on the chromatin is compromised following depleting SUMOylation and may contribute,  
507 at least partially, to the increase of iPSC efficiency obtained under these conditions.



## 508 Discussion

509 Over the last twelve years since the initial discovery of iPSCs, many approaches have been  
510 suggested for improving direct reprogramming efficiency and dynamics by the canonical  
511 Yamanaka factors (OSKM) (Takahashi and Yamanaka, 2016). Here we provide an additional  
512 example showing that radically efficient and deterministic direct induction of pluripotency is  
513 feasible with modified direct *in vitro* reprogramming approaches. The findings related to Gatad2a  
514 depletion and iPSC reprogramming characterized herein, expand work previously published by our  
515 lab that has demonstrated that optimized depletion of the NuRD complex component Mbd3, can  
516 alter this process and shift it toward deterministic dynamics and high efficiency (Rais et al., 2013).  
517 Nonetheless, complete depletion of Mbd3 during somatic state rapidly yields cell cycle  
518 malfunctions, thus technically restricting the usage of this platform to a carefully engineered set of  
519 mutant lines. In this work, we have further elucidated the mechanisms of Mbd3 repressive effect  
520 during reprogramming, and underlined the importance of NuRD complex recruitment, especially  
521 Gatad2a-Chd4. We have described Mbd3-Gatad2a-Chd4 as a triple component axis within NuRD  
522 complex (**Fig. S7F**), which mediates the inhibitory function of NuRD in the context of  
523 reprogramming and maintenance of naïve pluripotency. Disassembly of this sub-complex by  
524 different approaches, including elimination of one or more of its members, leads to efficient and  
525 (near-) deterministic reprogramming.

526

527 Results obtained herein underline the importance of the NuRD structure and sub-  
528 complexes; Chd4, Mbd3 and Gatad2a are all mutually exclusive in the NuRD complex and each  
529 can be replaced by a highly homologous protein (Chd3, Mbd2, Gatad2b, respectively). However,  
530 the specific and exact combination of all three seems to be crucial in order to execute the inhibitory  
531 function related to pluripotency and differentiation. This effect can be also seen in other  
532 physiological conditions (Bode et al., 2016) and development (e.g. brain cortical development)  
533 (Nitarska et al., 2016). Further, whether certain conformation of NuRD complex can also  
534 specifically enhances direct trans-differentiation between somatic cell types remains to be explored  
535 (Bussmann et al., 2009; Efe et al., 2011; Shu et al., 2013; Szabo et al., 2010; Vierbuchen et al.,  
536 2010).

537

538 While our results suggest that although the optimized depletion of Mbd3, Gatad2a or Chd4

539 result in a similar effect on iPSC reprogramming efficiency, these proteins hold differential roles,  
540 possibly in NuRD sub-complexes, or even in a NuRD-independent manner. This notion is  
541 supported by their different effect on cell proliferation and viability, and also expressed in their  
542 slightly different KO phenotypes during embryonic development, as both Chd4 and Mbd3 are  
543 embryonic lethal at a very early stage (E4.5-E6.5) (Kaji et al., 2007; O’Shaughnessy-Kirwan et al.,  
544 2015), while Gatad2a-KO embryos are viable until E8.5-10.5 (Marino and Nusse, 2007). Thus,  
545 along with the importance of the observations regarding the inhibitory role of Gatad2a-Mbd3 in the  
546 reprogramming process, it is clear that further work is needed to fully understand the mechanisms  
547 underlying Mbd3 functions (including NuRD dependent and independent ones) and specific role  
548 for Gatad2a, but not Gatad2b which can also assemble with Chd4/Mbd3. The findings that  
549 recruitment of OSKM by Mbd3/NuRD is prominent in primed or somatic state, but not in ground  
550 state naïve pluripotency, highlight the context dependent ability of NuRD interaction in different  
551 states whose molecular basis is of great future scientific interest.

552

553         Although this study shows in a variety of systems and assays that neutralizing Mbd3-  
554 Gatad2a-Chd4/NuRD complex facilitates up to 100% reprogramming efficiency, it remains to be  
555 seen whether all the cells follow the same molecular trajectory during the 8 days course or,  
556 alternatively, can achieve the final naïve state by distinct parallel paths. It is important to highlight  
557 that our results do not necessarily suggest that WT cells that succeed in generating iPSCs must  
558 neutralize this pathway (permanently or transiently) in order to succeed but may suggest that some  
559 cells succeed despite the negative effect of the presence of this complex. In other words, Gatad2a-  
560 Mbd3/NuRD may act like a negative rheostat rather than an absolute blocker for iPSC formation  
561 (Eggan, 2013; Smith et al., 2016; Zviran and Hanna, 2014), where it severely reduces the chance  
562 of conducive reactivation of correct reprogramming trajectory in Gatad2a/Mbd3 WT cells, since it  
563 represses that same genes OSKM are trying to reactivate (Rais et al., 2013). Upon dismantling this  
564 negative effector, nearly all cells embark correctly on a conducive reprogramming trajectory  
565 towards naïve pluripotency, which we characterize in detail in an accompanying manuscript by our  
566 group using the same platforms (accompanying submitted manuscript PDF copy is included with  
567 this submission) (Zviran et al., 2017).

568

569         A recent study has provided an NuRD independent example of the “gas and brakes”  
570 mechanisms for iPSC formation (Rais et al., 2013), where the OSKM reprogramming factors not

571 only recruit complexes that positively promote reactivation of naïve pluripotency, but also recruit  
572 negative factors, in this case the NCoR/SMRT-HDAC3 co-repressor complex (Zhuang et al.,  
573 2018). The study showed up to 70% Oct4-GFP reactivation over a reprogramming period of 12  
574 days by OSKM upon depletion of NCoR/SMRT (Zhuang et al., 2018)(in press – PDF attached with  
575 this submission). The latter is recruited directly by OSKM and negatively represses key loci  
576 required for successful reprogramming. The above results suggest that just like in the case of  
577 reprogramming factors that can act synergistically and occasionally substitute for each other to  
578 induce iPSCs (Festuccia et al., 2012; Martello et al., 2012; Qiu et al., 2015), multiple co-repressor  
579 complex like Mbd3/NURD, NCoR/SMRT, and potentially others may have overlapping effect in  
580 restraining the awakening of pluripotency in somatic cells (Rais et al., 2013; Zhuang et al., 2018).

581

582 Finally, it will be interesting to test whether by combining *Gatad2a* ablation with other  
583 manipulations that profoundly boost iPSC efficiency like transient *C/EBPa* expression in B cells  
584 (Di Stefano et al., 2013) or NCoR/SMRT depletion in MEFs (Zhuang et al., 2018), the kinetics and  
585 synchrony of the process can be further increased to reach that seen following somatic cell nuclear  
586 transfer where donor fibroblast turn on Oct4-GFP and acquire DNA global hypo-methylation by  
587 only up to 2 cell divisions (Gurdon, 2009; Jullien et al., 2014; Ma et al., 2014; Tachibana et al.,  
588 2013).

589

590

591

592

593

594

595

596

## 597 **Author Contributions**

598 N.M and Y.R. conceived the idea for this project, designed and conducted experiments, and wrote  
599 the manuscript with contributions from all other authors. M.Z., R.M., A.A.C and Y.R. conducted  
600 micro-injections. S.B. and S.G. conducted and supervised high-throughput sequencing. A.Z.  
601 assisted in RNA-seq analysis. N.M., Y.L. and D. E. conducted MS analysis. W.J.G. and J.B.  
602 assisted in establishing and analyzing ATAC-seq experiments. E.C. assisted in DNA methylation  
603 sample preparation and analysis. N.N. supervised all bioinformatics analysis and analyzed  
604 bioinformatics data. S.P., S.H., T.S., J.B., O.G, M.A.E., L.L and V.K. assisted in tissue culture,  
605 preparing DNA reagents and reprogramming experiments. H.M. and Y.B. conducted and analyzed  
606 synchronous replication timing experiments. T.H. and S.G. assisted in Co-IP experiments. Y.R. and  
607 N.M engineered cell lines under S.V. supervision and designs. D.S. and Y.M. assisted and  
608 supervised experiments related to SUMOylation. N.N., Y.R. and J.H.H. supervised executions of  
609 experiments, adequate analysis of data and presentation of conclusions made in this project.

610

## 611 **Acknowledgements**

612 We thank Bryce Carey, Yonatan Seltzer, Noam Stern-Ginossar and Naama Barkai for discussions.  
613 J.H.H is supported by a generous gift from Ilana and Pascal Mantoux, and research grants from the:  
614 European Research Council (ERC-Cog 2016 – CellNaivety), Flight Attendant Medical Research  
615 Council (FAMRI), Israel Science Foundation (ISF-ICORE, ISF-NFSC, ISF-INCPM & ISF-  
616 Morasha programs), Kamin-Yeda program, Minerva fund, Israel Cancer Research Fund (ICRF),  
617 Human Frontiers Science Program (HFSP), the Benozio Endowment fund, New York Stem Cell  
618 Foundation (NYSCF), Kimmel Innovator Research Award, the Helen and Martin Kimmel Institute  
619 for Stem Cell Research. J.H.H. is a New York Stem Cell Foundation (NYSCF)–Robertson  
620 Investigator. N.N. is supported by ISF-Morasha program. We thank the Weizmann Institute  
621 management and board for providing critical financial and infrastructural support.

622

623

624

## 625 **Figure Legends**

626 **Figure 1. Gatad2a depletion increases reprogramming efficiency and does not ablate somatic**  
627 **cell proliferation. A.** MEFs harboring TetO-OKSM and M2rtTA cassettes were transfected with  
628 siRNA targeting different canonical NuRD components (indicated in the illustration), 2 and 4 days  
629 after reprogramming initiation following DOX administration. Reprogramming was then evaluated  
630 by AP staining at day 8. **B.** Reprogramming efficiency following siRNA treatments was evaluated  
631 using AP staining, after 8 days of reprogramming (n=3, two-sided Student's t-test *p* values are  
632 indicated). **C.** Cell growth curves of MEFs treated with siRNA for the indicated NuRD components  
633 (two-sided Student's t-test *p* values are indicated). Knockdown (KD) of Gatad2a, unlike KD of  
634 Chd4, Mbd3 and Hdac2, does not severely inhibit cell proliferation. **D.** Representative images of  
635 cells treated with siRNA targeting Mbd3 or Gatad2a and exposed to BrdU in order to evaluate  
636 proliferation. **E.** Quantitative evaluation of BrdU incorporation test, which shows normal  
637 proliferation in siScramble and siGatad2a, unlike in cells treated with siMbd3 (n=8, two-sided  
638 Student's t-test *p* values are indicated Student's t-test). **F.** Knockdown for different canonical  
639 NuRD components does not show a significant elevation in cell death or apoptosis. Viability and  
640 apoptosis induction were measured using FACS following Annexin-PI staining. **G.**  
641 Reprogramming efficiency following siRNA treatments targeting different NuRD components, at  
642 different time points. KD was performed at two distinct cycles: the early one (Regimen 1, marked  
643 in black) started one day prior to DOX induction, and the second one (Regimen 2, marked in grey)  
644 started one day post-DOX induction. **H.** iPSC reprogramming efficiency following different siRNA  
645 treatments. was evaluated at day 8. (n=3 per each condition, two-sided Student's t-test *p* values are  
646 indicated). Gatad2a siRNA improves reprogramming whether administrated prior or post DOX  
647 administration, unlike siRNA targeting Mbd3 or Chd4, in which only in Regimen #2 iPSC colony  
648 formation efficiency was increased.

649

650 **Figure 2. Deterministic induction of naïve iPSCs in Gatad2a-KO somatic cells. A.** Scheme  
651 demonstrating strategy for generating secondary isogenic Gatad2a WT and KO lines, and  
652 comparing their reprogramming efficiency side by side. 2i/LIF-KSR conditions were introduced at  
653 day 3.5 during the 8-day course. More detailed information is provided in **Supplementary Fig.**  
654 **S2A** regarding different systems used herein. **B.** Targeting scheme of Gatad2a locus to generate  
655 knockouts by CRISPR/Cas9. **C.** Western blot validation of Gatad2a knockout in iPSC harboring  
656 M2rtTA and TetO-OKSM cassettes in comparison to its parental isogenic line. **D.** Representative

657 images of *Gatad2a*<sup>-/-</sup> iPSC derived E13.5 chimera. Red arrow highlights mCherry<sup>+</sup> chimera which  
658 originates from mCherry labeled iPSCs that were microinjected. **E.** Bulk iPSC reprogramming as  
659 in **F**, but experiment was terminated after 6 days and iPSC colony formation was evaluated by  
660 Alkaline Phosphatase staining (AP<sup>+</sup>). **F.** Representative flow cytometry measurements of  $\Delta$ PE-  
661 Oct4-GFP reactivation dynamics in polyclonal/bulk *Gatad2a*-WT and *Gatad2a*-KO isogenic cell  
662 lines. Throughout the course of the reprogramming experiment the cells were not passaged to avoid  
663 any biases. Reprogramming of secondary MEFs seeded as single cells. **G.** Representative  
664 summaries of single-cell iPSC reprogramming efficiency experiment. Secondary isogenic *Gatad2a*  
665 WT and KO reprogrammable MEFs carrying constitutively expressed mCherry-NLS and naïve  
666 pluripotency specific  $\Delta$ PE-Oct4-GFP reporter were sorted and seeded as single-cell per well.  
667 Reprogramming was initiated by DOX administration according to panel **A**. Reprogramming  
668 efficiency was assessed after 8 days based on the number of wells in which mCherry<sup>+</sup> cells formed  
669 an  $\Delta$ PE-Oct4-GFP positive colony. Throughout the course of the reprogramming experiment the  
670 cells were not passaged to avoid any biases. **H.** The indicated secondary *Gatad2a*<sup>+/+</sup> and *Gatad2a*<sup>-/-</sup>  
671 somatic cell types were isolated and subjected to single cell reprogramming and evaluation of iPSC  
672 efficiency following 8 days of DOX. Reprogramming efficiency was assessed after 8 days based  
673 on the number of wells in which mCherry<sup>+</sup> cells formed an  $\Delta$ PE-Oct4-GFP positive colony. In  
674 summary, these results indicate that complete inhibition of *Gatad2a* (also known as P66a), a NuRD  
675 specific subunit, does not compromise somatic cell proliferation as previously seen upon complete  
676 Mbd3 protein elimination, and yet disrupts Mbd3/NuRD repressive activity on the pluripotent  
677 circuitry and yields 90-100% highly-efficient reprogramming within 8 days as similarly observed  
678 previously in Mbd3 hypomorphic Mbd3<sup>lox/-</sup> donor somatic cells (Lujan et al., 2015; Rais et al.,  
679 2013).

680

681 **Figure 3. Whole-well mosaic live-cell imaging of reprogramming following *Gatad2a* ablation.**

682 **A.** Selected time-points (Days 3, 5 and 7) of full-well mosaic, acquired during live imaging of  
683 *Gatad2a*-KO secondary MEF, harboring constitutive mCherry-NLS and  $\Delta$ PE-Oct4-GFP reporter  
684 during OKSM mediated reprogramming. **B-C.** A zoom focusing on representative colonies (white  
685 squares C1 and C2 respectively in panel **A**), showing multiple time-points from live-imaging of the  
686 colonies' reprogramming. The global and focused images show how nearly all donor cells become  
687  $\Delta$ PE-OCT4-GFP<sup>+</sup>. **D.** Selected time-points of full-well mosaic, acquired during live-imaging of  
688 *Gatad2a*-WT (isogenic control to cells used in **A-C**) reprogramming. **E-F.** A zoom focusing on  
689 representative colonies (white squares C3 and C4 respectively in panel **D**), showing multiple time-

690 points from live-imaging of the colonies' reprogramming. The global and focused images show  
691 how most growing clones (labeled with mCherry) do not reactivate  $\Delta$ PE -Oct4-GFP expression  
692 (e.g. clone #3 in panel E), and only some rare clones become iPSCs (e.g. Colony #4 highlighted in  
693 panel F). Please see **Supplementary Videos 1-2**, from which these images were taken.

694

695 **Figure 4. Authentic naïve pluripotency establishment by OSKM specifically following**  
696 **Gatad2a depletion.** **A.** Hierarchical clustering of transcription profiles of samples from  $Gatad2a^{-/-}$   
697 system and two WT systems, where WT are isogenic to  $Gatad2a^{-/-}$  and WT\* are non-isogenic.  
698 Values are unit-normalized FPKM (see **Methods**). iPSC samples from all systems cluster together,  
699 along with  $Gatad2a^{-/-}$  samples from days 6-8. MEF samples from all system also cluster together,  
700 along with all WT samples. Starting  $Gatad2a^{-/-}$  MEF and IPS cells are comparable to those of WT.  
701 **B.** PCA of  $Gatad2a^{-/-}$  and isogenic  $Gatad2a^{+/+}$  WT system, showing the transformation from MEF  
702 to iPSC, and that MEF and iPSC are similar in both systems. PCA was calculated over the same set  
703 of genes shown in (A). Only isogenic sample sets were included in analysis shown in Panel B. **C.**  
704 Correlation matrices between  $Gatad2a^{-/-}$  and WT cells, based on H3K27ac signal (left), and DNA-  
705 methylation signal (right). Correlation of H3K27ac signal was calculated over promoters of all  
706 differential genes (n=14,033), or over differential enhancers (n=12,153). Correlation of DNA  
707 methylation signal was calculated over promoters of differential genes that are covered by the  
708 sequencing method (n=9,134), or over covered differential enhancers (n=11,413). **D.**  
709 Reprogramming efficiency of  $Gatad2a^{-/-}$  secondary cells was evaluated before and after introducing  
710 different exogenous transgenes (Tg), including  $Gatad2a$ -Tg. **E.** Targeting strategy for generating  
711  $Gatad2a$  conditional knockout reprogrammable system and ESCs. **F.** Western-blot time-course  
712 based validation for  $Gatad2a$  protein depletion in  $Gatad2a^{fllox/fllox}$  MEFs following Tat-Cre treatment  
713 (HTNC). **G.** Complementing PCR based validation of  $Gatad2a$  floxed allele deletion following  
714 4OHT treatment (the cells also harbor a correctly targeted Rosa26-CreERT allele). **H.**  $Gatad2a^{fl/fl}$   
715 reprogrammable MEF were derived and underwent Cre induction for 4 days, and only afterwards  
716 DOX reprogramming was initiated for 8 days as described in **Fig. 2A, E** (n=3 per conditions,  
717 student's t-test *p* value is indicated).

718

719 **Figure 5. Gatad2a depletion enhances naïve pluripotency maintenance and induction from**  
720 **primed EpiSCs.** **A.** Representative images of isogenic  $Gatad2a^{+/+}$ ;  $\Delta$ PE-Oct4-GFP and  $Gatad2a^{-/-}$   
721  $\Delta$ PE-Oct4-GFP ESCs that can be stably expanded in both FBS/LIF and 2i/LIF naïve conditions.

722 (scale= 100  $\mu$ M). **B.** Representative immunostaining of Gatad2a-KO ES. The Cells stained positive  
723 for various pluripotency markers, including Esrrb, Nanog and SSEA-1. (Scale bar = 100  $\mu$ M). **C.**  
724 Western blot comparing pluripotency proteins' level between Gatad2a-WT and KO isogenic ES  
725 lines. **D.** Isogenic Gatad2a<sup>+/+</sup> and Gatad2a<sup>-/-</sup> ESCs were maintained on Gelatin coated plates in  
726 FBS/LIS or FBS only conditions for 5 passages and then subjected to FACS analysis for OG2  $\Delta$ PE-  
727 Oct4-GFP pluripotency levels. **E.** Priming of Gatad2a<sup>+/+</sup> and Gatad2a<sup>-/-</sup> naïve ESCs harboring OG2  
728  $\Delta$ PE- Oct4-GFP reporter by changing conditions from 2i/LIF to Fgf2/Activin A was performed.  
729 While WT cells exhibit dramatic morphological change after 60 hours of treated with primed  
730 Fgf2/Activin A containing medium, Gatad2a-KO show resistance in losing their domed  
731 morphology and downregulating naïve pluripotency specific  $\Delta$ PE-Oct4-GFP reporter. **F.**  
732 Transcriptional expression of different pluripotency and early differentiation markers before and  
733 after Fgf2/Activin A exposure, in isogenic Gatad2a<sup>+/+</sup> and Gatad2a<sup>-/-</sup> ESCs, presented as a relative  
734 expression column scheme. **G.** Gatad2a-KO ESCs generate mature and normal teratomas, including  
735 mature cells from all three germ layers of development. **H.** Strategy for generating isogenic  
736 Gatad2a<sup>flox/flox</sup>  $\Delta$ PE-Oct4-GFP was established from parental cells expanded for 8 passages in  
737 FGF2/Activin A and was validated for priming by FACS and RT-PCR analysis. Established  
738 Gatad2a<sup>flox/flox</sup>,  $\Delta$ PE-Oct4-GFP was treated with Tat-CRE, and sub cloned isogenic Gatad2a <sup>$\Delta/\Delta$</sup>   
739 EpiSC lines were derived and used for analysis within additional 5 passages of their sub cloning. **I.**  
740 Single cell reprogramming efficiency and quantification for EpiSC reprogramming from different  
741 mutant EpiSC lines. Rescue Gatad2a-Tg or control Mock-Tg were ectopically expressed in  
742 Gatad2a <sup>$\Delta/\Delta$</sup>  EpiSC and included in the analysis. (n=3 per time point, *p* Value<0.0001, two-sided  
743 Student's t-test).

744

745 **Figure 6 - Gatad2a, Mbd3 and Chd4 constitute a critical axis within the NuRD complex**  
746 **mediating iPSC reprogramming inhibition.** **A.** Mass spectrometry analysis of NuRD complex  
747 components binding efficiency to Mbd3 in Gatad2a-KO and its isogenic Gatad2a-WT line, in MEF  
748 cells during reprogramming by OSKM. Only putative NuRD components are presented and can be  
749 seen in an equal strength at both platforms, except for Chd4, which does not bind Mbd3 in Gatad2a-  
750 KO. Flag-Tagged Mbd3 was used to establish a platform for studying Mbd3-binding proteins, by  
751 correct targeting of TetO-Mbd3-Flag into the M. Col1a locus. Isogenic Gatad2a-KO were generated  
752 from this line with CRISPR/Cas9 and used for the IP and MS analysis indicated above (See **Fig.**  
753 **S2Aiii**). **B.** Flag-Mbd3 CoIP in Gatad2a-WT and Gatad2a-KO cells. Experiments were conducted  
754 both in MEF cells and ESs. **C.** Cells during reprogramming were treated with siRNA targeting



755 Gatad2a, and pellets collected after four days. CoIP of Chd4 shows that siGatad2a prevents Mbd3  
756 binding to Gatad2a but also to Chd4. **D.** Gatad2a-KO MEF with overexpression of Gatad2a  
757 (transgenic recovery; abbreviated as Gatad2a-Tg) or Mock were subjected to Chd4-CoIP. Gatad2a-  
758 overexpression recovers the binding of Chd4 to Mbd3 and does not affect its binding to Mta2. **E.**  
759 The coiled coil region of Mbd3 is highly conserved between different organisms, and different  
760 proteins in the MBD family. The highlighted amino acids are crucial for Gatad2a binding to Mbd3  
761 or Mbd3. **F.** A scheme of Flag tagged Mbd3, and mutant forms of Mbd3: lacking the Coiled coil  
762 region ( $\Delta$ CCR-Mbd3) or the methyl-binding domain ( $\Delta$ MBD-Mbd3). **G.** WT-Mbd3 and both  
763 mutants were over-expressed in 293T cells and were subjected to Flag-Mbd3 CoIP to examine their  
764 protein interactions. While the deletion of MBD prevents the binding of Klf4, only the deletion of  
765 the coiled coil region abolished the binding to Chd4 and Gatad2a. **H-I.** Mbd3<sup>fl/-</sup> secondary MEF,  
766 harboring  $\Delta$ PE-Oct4-GFP reporter, were transfected with two different forms of Flag tagged WT-  
767 Mbd3 and  $\Delta$ CCR-Mbd3. The cells were then subjected to reprogramming. While WT-Mbd3  
768 significantly reduced reprogramming efficiency ( $p$  Value<0.0001, two-sided Student's t-test, n=3),  
769  $\Delta$ CCR-Mbd3 expression was not able to inhibit deterministic reprogramming in the cells, consistent  
770 with its inability to interact and recruit Chd4 to the assembled complex.

771

772 **Figure 7 - Interactions and assembly of Gatad2a-Mbd3/NuRD are context dependent and can**  
773 **be modified post-translationally.** **A.** Rosa26-M2rtTA Col1a:TetO-2XFlag-Mbd3 ES cells were  
774 subjected to different differentiation protocols, and cells from 5 distinct states (naïve ESC, EpiLC,  
775 EBs, MEF, 4-day OSKM Reprogramming) were subsequently subjected to CoIP with anti- Flag-  
776 Mbd3. Lysates were then analyzed by western blot, and reacted with different antibodies against  
777 different NuRD components, Pluripotency factors, and other epigenetic proteins. While some of  
778 the proteins show constitutive binding to Mbd3 throughout all differentiation states (Mta2, Prmt5)-  
779 other proteins show differential binding (Oct4, Klf4, Cdk2ap1) and the latter is not correlated with  
780 the proteins level in the cell. **B.** Rosa26-M2rtTA Col1a:TetO-2XFlag-Mbd3 ES cells were either  
781 maintained in ground state naïve conditions or in priming conditions (Fgf2/Activin A). Lysates  
782 were subjected to Co-IP with anti-Flag-Mbd3 and examined by Western blot. Oct4 protein  
783 expression is significantly reduced after priming, but its binding to Mbd3 can be detected only in  
784 the primed pluripotent state. **C.** Mbd3 expression in ES cells treated with growth media containing  
785 different small molecules, after 72 hours of treatment. Unlike other treatments, PKCi Go6983 (5  
786  $\mu$ M) treatment resulted in a radical decrease in Mbd3 protein expression. **D.** PKCi Go6983 effect  
787 on Mbd3 level is seen after approximately 48 hours, in different concentration ranging from 0.5 to

788 10  $\mu$ M. **E.** WT EpiSCs reversion efficiency to naïve ESCs in different conditions. Anova test P  
789 values are indicated. (one representative experiment out of 3 performed is shown). **F.** Isogenic WT  
790 and Gatad2a KO ESCs were expanded on feeder free gelatin coated plates in N2B27 LIF only or  
791 LIF/PKCi conditions. Phase images and Oct4-GFP signal maintenance are shown after 8 passages  
792 (P8). Oct4-GFP. **G.** ES cells treated with naïve ground state condition were treated with shRNA  
793 targeting Ubc9 or Scramble. Cells were lysed and subsequent CoIP of Chd4 shows a decrease in  
794 Gatad2a binding to the protein. **H.** Cells induced in naïve ground state 2i/LIF conditions and  
795 subsequent shRNA targeting either for Ubc9 or scramble negative control. The cells were lysed  
796 and fractioned – Cytoplasm, Nucleoplasm and Chromatin fractions, proteins were analyzed by  
797 western blot. The NuRD components Mbd3 and Gatad2a , but not Mta2, can be seen mainly in the  
798 chromatin fraction, and their expression is significantly reduced following shUbc9 treatment.

799

800

801

802

803

804

805

806

807

808

809

810

811

812

813

## 814 **Supplementary Figure Legends**

815 **Supplementary Figure S1. iPSC colonies formed following reprogramming with siRNA for**  
816 **Gatad2a are pluripotent. A.** Western blot analysis following siRNA transfection for different  
817 NuRD components in MEFs, in order to validate specific protein deletion. **B.** Representative  
818 immunostaining of one of the iPSC clones derived from cells treated with siGatad2a (siGatad2a  
819 iPSC), stained positive to different pluripotent markers. Scale= 100  $\mu$ M. **C.** *In vivo* teratoma  
820 formation following injection of an siGatad2a iPSC clone #2, demonstrating contribution to all  
821 three germ layers of development. **D.** MEFs harboring TetO-OKSM and M2rtTA cassettes were  
822 transfected with siRNA targeting Zmynd8 or Gatad2a, 2 and 4 days after reprogramming initiation  
823 following DOX administration. Reprogramming was then evaluated by AP staining at day 8 (n=4,  
824 two-sided Student's t-test *p* values are indicated).

825

826 **Supplementary Figure S2. Generation of Gatad2a WT and depleted isogenic secondary**  
827 **platforms for iPSC reprogramming. A.** Three different clonal sets of isogenic secondary OSKM  
828 reprogrammable cells/sets were generated: (i) MEFs were reprogrammed to iPSC following viral  
829 infection of FUW-M2rtTA and FUW-OKSM. mCherry constitutive marker and  $\Delta$ PE-Oct4-GFP  
830 markers were then introduced to the iPSC. (ii) R26-M2rtTA<sup>+/+</sup> m. Col1a-OKSM<sup>+/+</sup> ES were derived  
831 from E3.5 embryos following mating of mice. (iii) ES Kh2 m.Col1a-TetO-2XFlag-Mbd3 were  
832 injected to blastocysts, and MEF were harvested at E12.5. MEF were then reprogrammed following  
833 viral infection of FUW-OKSM. All described cell lines were then subjected to Gatad2a-KO using  
834 CRISPR/Cas9, followed by an injection of both the KO and its isogenic WT to blastocysts.  
835 Chimeric fibroblasts were separated from the donor cells by Puromycin selection. **B.** Summary of  
836 CRISPR/Cas9 strategy to generate Gatad2a null cells. sgRNA targeted sequence is indicated. **C.**  
837 Correct targeting efficiency by the strategy described in **B** to generate mouse Gatad2a KO PSCs as  
838 determined both by Western blot analysis and PCR sequencing. **D.** Representative Western blot  
839 analysis for sub cloned lines following targeting Gatad2a with sgRNA. Blue arrows indicate  
840 examples of KO clonal lines. **E.** Transcriptome landscape (RNA-seq), alongside ATAC-seq and  
841 H3K27Ac ChIP-seq, of fibroblasts (FSP-1 and Thy1) and pluripotent (Nanog and Sall4) related  
842 genes. IGV Data range is indicated at the top right corner of the signal.

843

844 **Supplementary Figure S3. Gatad2a-KO has a dramatic beneficial effect on reprogramming**  
845 **efficiency in various conditions.** **A.** Representative image of secondary  $Gatad2^{-/-}$  MEFs expanded  
846 in the absence of DOX. The cells had normal growth rate in comparison to their isogenic WT and  
847 passage matched  $Gatad2^{+/+}$  MEF controls. **B.** A Comparison of  $\Delta$ PE-Oct4-GFP reactivation  
848 dynamics' statistics measured by flow-cytometry, in  $Gatad2a$ -WT and  $Gatad2a$ -KO isogenic  
849 platforms (n=6 wells per each time point). **C.** 96-well plates before and after 8 days of DOX  
850 induction were fixed and double stained for the indicated pluripotency markers. Frequency of  
851 positive scoring wells is indicated per each system and at different time points. **D.** Flow-cytometry  
852 measurements of  $\Delta$ PE-Oct4-GFP reactivation in cells grown with different mediums. The  
853 beneficial effect of  $Gatad2a$ -KO was conserved in different mediums, including serum-based  
854 conditions. **E.** Monoclonal lines were established from  $Gatad2a^{+/+}$  and  $Gatad2a^{-/-}$  secondary cells  
855 and reprogrammed in 2i/LIF + DOX conditions as indicated in **Fig. 2A**. Fraction of Pre-iPSC  
856 partially reprogrammed lines (mCherry<sup>+</sup>/Oct4-GFP<sup>-</sup>) is indicated following measurement at Day  
857 25 following reprogramming initiation (total of 4 passages). **F.** Representative immunostaining of  
858 a randomly selected clonal  $Gatad2a$ -KO iPSC (from system i) shows positive staining for all  
859 different bona fide mouse naïve pluripotency markers (scale bar = 100  $\mu$ M).

860

861 **Supplementary Figure S4. Full-well mosaic live-cell imaging of reprogramming following**  
862 **Gatad2a ablation.** Related to Fig. 3. Selected time-points from live-imaging of  $Gatad2a$ -KO and  
863  $Gatad2a$ -WT reprogramming. Full-well mosaic of mCherry, Oct4-GFP and combined channels,  
864 shown for reprogramming of  $Gatad2a$ -KO (**A**) and its isogenic  $Gatad2a$ -WT paternal control (**B**)  
865 secondary MEF, harboring constitutive mCherry and  $\Delta$ PE-Oct4-GFP reporter, at different time-  
866 points (days 3-7). Please also see **Supplementary Videos 1-2**.

867

868 **Supplementary Figure S5. Characterization of iPSC lines obtained.** **A.** Representative  
869 teratomas obtained following injection of the indicated iPSC lines. Mature differentiation was  
870 evident in all teratomas analyzed from all 15 randomly selected clones tested. **B.** A high  
871 contribution male chimeric mouse obtained following injection of  $Gatad2a$ -Tg rescued iPSC clone  
872 #1 (white arrow), and its agouti colored offspring (green arrow) obtained following mating with  
873 C/57B6 female, thus demonstrating successful germline transmission. **C.** Transcriptional level of  
874 selected fibroblast and pluripotent genes, as measured in MEF and iPSC cells of 2 different systems:  
875  $Gatad2a^{-/-}$ , isogenic WT and non-isogenic WT\* cells. **D.** Reprogramming efficiency of  $Gatad2a^{-/-}$

876 MEFs after transduction with the indicated combinations of reprogramming factors at day 9.  
877 Polycistronic vectors were used for OSK and OSKM combinations. One representative experiment  
878 of three independent sets is shown. **E.** Protein validation of Gatad2a or Gatad2b transgenic (Tg)  
879 over-expression following lentiviral transfection in Gatad2a-KO MEF. **F.** Representative image  
880 shows how partially reprogrammed Pre-iPSCs can be obtained only from lines with transgenic  
881 rescued Gatad2a expression (mCherry+/ $\Delta$ PE-Oct4-GFP-; lower panels), but not from parental  
882 Gatad2a-KO cells (only mCherry+/ $\Delta$ PE-Oct4-GFP+ cells can be obtained; upper panels). **G.**  
883 Overexpression of Gatad2a, but no Gatad2b, in Gatad2a-KO reprogrammable MEF reduces  
884 reprogramming efficiency comparing to mock overexpression control (N=4 per sample). **H.**  
885 Gatad2a-KO secondary MEF were subjected to reprogramming. At each time-point, the cells were  
886 labeled with BrdU, and replication time was examined using OlfR probe (Chromosome 6), as  
887 described (Masika et al., 2017). Approximate replication time of each allele is graphically described  
888 in (i) and in table (ii) summarizes replication time (for different time points days 1-8 and iPSC  
889 number of cells analyzed: n= 90,106, 79, 106, 101, 108, 42, 109, 124).

890

891 **Supplementary Figure S6. Gatad2a ablation compromises induction and maintenance of**  
892 **primed murine pluripotency.** **A.** RT-PCR analysis of different pluripotency and early  
893 differentiation markers before and after Fgf2/Activin A exposure, in isogenic Gatad2a<sup>+/+</sup> and  
894 Gatad2a<sup>-/-</sup> ESCs. **B.** Gatad2a<sup>fllox/fllox</sup> naïve ES were subjected to priming using FGF/Activin A for 8  
895 passages, followed by Cre-treatment in order to delete Gatad2a and sub clone isogenic Gatad2a <sup>$\Delta\Delta$</sup>   
896 EpiSC lines. Subsequently, Gatad2a <sup>$\Delta\Delta$</sup>  EpiSC were characterized at early and late passages in  
897 EpiSC conditions. **C.** Immunostaining analysis showed that with extended passaging Gatad2a <sup>$\Delta\Delta$</sup>   
898 began to re-activate naïve pluripotency markers (Esrrb and Nanog) and to down-regulate  
899 differentiation markers, such as Brachyury despite the absence of 2i/LIF conditions and continued  
900 expansion in Fgf2/Activin A primed conditions. **D.** Nanog and  $\Delta$ PE-Oct4-GFP profiled in late  
901 passage Gatad2a <sup>$\Delta\Delta$</sup>  EpiSCs and after 5 days reversion in 2i/LIF.

902

903 **Supplementary Figure S7. Gatad2a, Mbd3 and Chd4 constitute a critical axis within the**  
904 **NuRD complex mediating iPSC reprogramming inhibition.** **A.** A scheme of Gatad2a constructs  
905 and mutants used. Gatad2a-WT, Gatad2a-Truncated (lacking the CCR2 of Gatad2a) and HA-  
906 tagged-CCR1-Gatad2a construct. **B.** Flag-Mbd3 and different Gatad2a constructs were co-  
907 transfected in 293T cells. Flag-Mbd3 binds both forms of Gatad2a (WT and truncated), as shown

908 by Flag-Mbd3 CoIP. **C.** Dot blot analysis to validate protein expression following HA-Gatad2a-  
909 CCR1 peptide overexpression. **D.** Overexpression of Flag-Mbd3 with HA-Gatad2a-CCR1 or  
910 control (HA-GFP) in 293T cells, followed by Co-IP for anti-Flag-Mbd3. Over-expression of  
911 Gatad2a-CCR1 reduces the binding of Mbd3 to endogenous Gatad2a and Chd4, comparing to the  
912 control specimen. Further, CCR can cause a reduction in Mbd3 binding to endogenous Gatad2a  
913 and Chd4, without changing other NuRD components (such as Hdac2) binding. **E.** Overexpression  
914 of STEMCCA-OKSM vector, HA-MBD (methyl-binding domain of Mbd3) or HA-GFP in 293T  
915 cells, was followed by Co-IP with anti-HA. The results demonstrate that MBD domain can bind to  
916 pluripotency factors such as Oct4 and to the NuRD component Hdac2 but cannot bind Gatad2a or  
917 Chd4. **F.** Summarizing scheme for three different approaches for neutralizing Mbd3-Gatad2a-Chd4  
918 axis: (i) by deleting the CCR domain of Mbd3 (ii) KO or KD of Gatad2a protein and (iii)  
919 overexpression of an exogenous Gatad2a-CCR competitive peptide that interferes with Gatad2a-  
920 CCR interaction with Mbd3.

921

922 **Supplementary Figure S8 - Interactions and assembly of Gatad2a-Mbd3/NuRD are context**  
923 **dependent and can be modified post-translationally.** **A.** Western blot showing Mbd3 protein  
924 levels in ESCs expanded in the indicated growth conditions. Mbd3 levels were decreased following  
925 PKCi (Go6983) treatment in ES cells maintained in different conditions (FBS and KSR based  
926 growth media, supplemented with 2i). **B.** Reduction in Mbd3 protein expression is maintained  
927 following long term PKCi (Go6983) treatment, as examined in different concentrations (0.5-5  $\mu$ M).  
928 Media was exchanged ever 48h. **C.** Western blot analysis for different NuRD components in ESC  
929 cells with and without Go6983. Analysis shows that other NuRD components expression level is  
930 not affected from PKCi (Go6983) treatment. **D.** as in A, but a different PKCi was used, termed  
931 GFX which does not inhibit atypical PKC pathway. **E.** Mbd3 protein levels following shRNA  
932 treatment of mouse V6.5 ESCs for atypical PKCzeta isoform. **F.** Mbd3 levels in MEFs following  
933 treatment with Go6983 are not affected. **G.** RT-PCR analysis for Mbd3 transcript abundance 24  
934 and 48h following PKCi Go6983 treatment, do not show significant changes and reduction in Mbd3  
935 transcript level. This suggests that the depletion in Mbd3 protein levels shown in **A-C** is post-  
936 translational. **H.** Go6983 causes mild depletion in Mbd3 in MEFs following 3 days of OSKM  
937 expression. **I.** Gatad2a<sup>+/+</sup> WT MEFs carrying  $\Delta$ PE -Oct4-GFP reporter and constitutive mCherry  
938 markers (secondary system i) were subjected to iPSC reprogramming protocols in in **Fig. 2A** and  
939 iPSC efficiency was quantified at day 8. In the last two conditions included in the panel, the MEFs  
940 were pre-treated with control and Ubc9 shRNA following with Neomycin selection (Cheloufi et

941 al., 2015), and then subjected to DOX mediated iPSC reprogramming. Anova P values are  
942 indicated. **J.** A Schematic representation of Gatad2a known domains and confirmed SUMOylation  
943 sites (Gong et al., 2006). Importantly, harnessing prediction tools (Zhao et al., 2014) for  
944 identification of possible SUMO consensus sites results in 2 additional sites inside the coiled coil  
945 regions (Chi-squared test  $p$  value<0.05). **K.** 2-d08 specific small molecule inhibitor for  
946 SUMOylation was applied during co-IP experiments for Chd4 at the indicated increasing  
947 concentrations known to deplete global SUMOylation levels. Cells were lysed the CoIP of Mbd3  
948 shows a decrease in Gatad2a binding to Chd4, as similarly seen with shRNA depletion of Ubc9  
949 (**Fig. 7G**). **L.** As in **Fig. 7H** with immunoblot for SUMO2/3 on the same exact gel series.

950

951 **Supplementary Video 1 – Whole-well unbiased mosaic live-cell imaging of isogenic Gatad2a-**  
952 **WT and Gatad2a-KO cells during reprogramming.** Two movies presented side by side (Left-  
953 Gatad2a-WT, Right- Gatad2a-KO), acquired as live-cell imaging of isogenic secondary MEF,  
954 harboring constitutive mCherry-NLS and  $\Delta$ PE-Oct4-GFP reporter, during OKSM mediated  
955 reprogramming. The two lines are isogenic and differ only by the ablation of Gatad2a. The movie  
956 describes days 3-7 of the process, as can be seen in 4 different panels- including mCherry only  
957 (showing only the proliferation of the viable donor cells) and GFP only (showing naïve state  
958 induction efficiency).

959

960 **Supplementary Video 2 – Whole-well unbiased mosaic live-cell imaging of Gatad2a-KO**  
961 **during iPSC reprogramming.** Live-cell imaging of Gatad2a-KO secondary MEF, harboring  
962 constitutive mCherry-NLS and  $\Delta$ PE-Oct4-GFP reporter, during OKSM mediated reprogramming.  
963 The movie describes 4 different replicates during days 3-7 of the reprogramming process,  
964 maintained in the same conditions.

965

966

967

968

## 969 **Methods**

### 970 **Mouse stem cell lines and cell culture.**

971 WT or Mutant mouse ESC/iPSC lines and sub-clones were routinely expanded in mouse ES  
972 medium (mESM) consisting of: 500ml DMEM-high glucose (ThermoScientific), 15% USDA  
973 certified Fetal Bovine Serum (Biological Industries), 1mM L-Glutamine (Biological Industries),  
974 1% nonessential amino acids (Biological Industries), 0.1mM  $\beta$ -mercaptoethanol (Sigma),  
975 penicillin-streptomycin (Biological Industries), 10 $\mu$ g recombinant human LIF (Peprotech). For  
976 ground state naïve conditions (N2B27 2i/LIF), murine naïve pluripotent cells (iPSCs and ESCs)  
977 were conducted in serum-free chemically defined N2B27-based media: N2B27-based media:  
978 250ml Neurobasal (ThermoScientific), 250ml DMEM:F12 (ThermoScientific) 5ml N2 supplement  
979 (Invitrogen; 17502048), 5ml B27 supplement (Invitrogen; 17504044), 1mM glutamine  
980 (Invitrogen), 1% nonessential amino acids (Invitrogen), 0.1mM  $\beta$ -mercaptoethanol (Sigma),  
981 penicillin-streptomycin (Invitrogen), 5mg/ml BSA (Sigma), small-molecule inhibitors  
982 CHIR99021 (CH, 3  $\mu$ M - Axon Medchem) and PD0325901 (PD, 1  $\mu$ M - Axon Medchem). Primed  
983 N2B27 media for murine cells (EpiSCs or EpiLCs) contained 12ng/ml recombinant human FGF2  
984 (Peprotech Asia) and 20ng/ml recombinant human ACTIVIN A (Peprotech) (instead of 2i/LIF).  
985 Mycoplasma detection tests were conducted routinely every month with MycoALERT ELISA  
986 based kit (Lonza) to exclude mycoplasma free conditions and cells throughout the study.

987

### 988 **Conversion of naïve ESC to EpiLC or EpiSC**

989 Naïve ESCs were seeded on Matrigel coated plates, at  $5 \times 10^5$  cells per well (6-wells plate), in naïve  
990 N2B27 2i/LIF conditions after being contained in those conditions for at least 10 days. After 24  
991 hours, medium was changed to N2B27 supplemented with FGF2 (12ng/ml, Peprotech) and  
992 ACTIVIN A (20ng/ml, Peprotech). EpiLCs were harvested and validated at 48-96 post induction  
993 of priming. EpiSCs, which are lines stably expanded in FGF2/ACTIVIN A conditions were  
994 maintained on Matrigel coated plates and passaged with collagenase every 4-5 days as previously  
995 described (Brons et al., 2007; Geula et al., 2015; Tesar et al., 2007).

996

997



## 998 **Knockout by CRISPR/Cas9 targeting**

999 Different PSC lines (as elaborated previously) were genetically manipulated by CRISPR/Cas9, in  
1000 order to achieve Gatad2a-KO on different genetic backgrounds. Cells were transfected (Xfect,  
1001 clontech) with Cas9-sgRNA Gatad2a (CGCCTGATGTGATTGTGCTCT) on px330 backbone,  
1002 alongside mCherry-NLS plasmids. The cells were sorted after 72 hours (mCherry positive cells)  
1003 under sterile conditions via ND FACS ARIA III, and seeded on irradiated MEFs. After 8 days,  
1004 colonies were picked and examined by HRM analysis (MeltDoctor HRM master mix, Life  
1005 technologies, #4415440). Candidate colonies were analyzed by western blot and confirmed by  
1006 sequencing. For generation of floxed conditional knockout Gatad2a cells, CRISPR/Cas9 and donor  
1007 vector were used as described (**Fig 4E**). Briefly, cells were transfected by electroporation with both  
1008 donor vector containing Gatad2a Exon2 flanked by lox sequences, and px330 Cas9-sgRNA  
1009 (gatacccatggtgcccacgg). Cells were subjected to selection by G418 and subsequent analysis of  
1010 selected clones by Southern Blot. Southern Blot analysis was used to confirm correct targeting. 10-  
1011 15µg of genomic DNA was digested with HindIII restriction enzyme for 5 hours and separated by  
1012 gel electrophoresis. The DNA was transferred to a nitrocellulose membrane that was next  
1013 hybridized with a radioactive labeled probe and developed using ECL (ThermoScientific). Positive  
1014 clones were transfected with Flippase to excise the neomycin selection cassette.

1015

## 1016 **Secondary reprogrammable cells and systems**

1017 Please see **Fig. S2A** for schematics summarizing the three isogenic systems detailed below:

1018 System i: FUW-M2RtTA; FUW-TetO-STEMCCA, ΔPE-GOF18-Oct4-GFP cells: 129Jae MEFs  
1019 were transduced with constitutively expressed FUW-M2RtTA and with FUW-TetO-STEMCCA-  
1020 OKSM (Sommer et al., 2009) via standard lentiviral preparation and infection. Cells were then  
1021 reprogrammed in mESM + DOX for 14 days, and number of clonal iPSC line were established. A  
1022 randomly selected clone was then transduced with ΔPE-Oct4-GFP carrying Zeomycin resistance  
1023 (Addgene # 52382) (Gafni et al., 2013; Rais et al., 2013). Randomly selected clone validated for  
1024 specific activity of the ΔPE-GOF18-Oct4-GFP reporter (downregulated upon priming and  
1025 completely shut off upon differentiation 10 day EBs), was next labeled with a constitutively  
1026 expressed mCherry-NLS cassettes using electroporation (Addgene #52409) (Rais et al., 2013).  
1027 Only then, a sub cloned clone was subjected to CRISPR/Cas9 targeting in order to generate and

1028 isogenic *Gatad2a*-KO cell line which was used as a source for secondary somatic cells or EpiSCs  
1029 and used for conversion.

1030 System ii: M.Col1a:STEMCCA-OKSM<sup>+/+</sup>; Rosa26-M2rtTA; ΔPE-GOF18-Oct4-GFP cells: R26-  
1031 M2rtTA homozygous mice (Jackson #006965) were mated with m.Col1a-TetO-STEMCCA-  
1032 OKSM (Jackson #011001, kindly provided by K. Hochedlinger) homozygous mice, in order to  
1033 produce M2rtTA-OKSM mice double positive mice. The F1 mice were mated in order to create  
1034 double homozygous offspring (RTTA<sup>+/+</sup> OKSM<sup>+/+</sup>). F2 offspring (Double homozygous rtTA<sup>+/+</sup>  
1035 OKSM<sup>+/+</sup>) were mated with previously generated ΔPE-GOF18-Oct4-GFP homozygous reporter  
1036 transgenic mice (also known as OG2 strain and line) (Jackson 004654, kind gift by H. Scholer), in  
1037 order to generate a double heterozygote with Oct4 reporter offspring (M2rtTA<sup>+/-</sup> OKSM<sup>+/-</sup> ΔPE-  
1038 GOF18-Oct4-GFP<sup>+/-</sup>). Subsequently, mouse ESCs were derived in mESM-MEF conditions and a  
1039 cell line carrying the above genotype was transduced with a constitutively expressed mCherry-NLS  
1040 cassettes using electroporation. Only then, a sub cloned clone was subjected to CRISPR/Cas9  
1041 targeting in order to generate and isogenic *Gatad2a*-KO cell line which was used as a source for  
1042 secondary somatic cells or EpiSCs and used for conversion.

1043 System iii: FUW-TetO-STEMCCA-OKSM R26-rtTA Cola:tetO-3XFlag-Mbd3: MEFs generated  
1044 via microinjection of R26-rtTA col1a:TetO-3XFlag-Mbd3 ESCs, were introduced with OKSM  
1045 (FUW-TetO-STEMCCA-OKSM) using a lentiviral transduction. An iPSC cell line was established  
1046 in mESM + DOX conditions, and subsequent *Gatad2a*-KO was achieved using CRISPR-Cas9  
1047 genome editing. In all of the above, both the *Gatad2a*-KO and the isogenic *Gatad2a*-WT were then  
1048 injected to a blastocyst, and MEF were harvested at E12.5-E13.5. Chimeric MEF were then isolated  
1049 using Puromycin resistance.

1050

1051 Secondary mouse embryonic fibroblast (MEF) from *Mbd3*<sup>fllox/-</sup> cell line (A12 clone:  
1052 *Mbd3*<sup>fllox/-</sup> cell lines that carries the GOF18-Oct4-GFP transgenic reporter (complete *Oct4* enhancer  
1053 region with distal and proximal enhancer elements) (Addgene plasmid #60527)) and WT\* cell line  
1054 (WT-1 clone that carries the deltaPE-GOF18-Oct4-GFP reporter (Addgene plasmid#52382) were  
1055 previously described (Rais et al., 2013). Note that we do not use Oct4-GFP or any other selection  
1056 for cells before harvesting samples for conducting genomic experiments. All animal studies were  
1057 conducted according to the guideline and following approval by the Weizmann Institute IACUC  
1058 (approval # 33550117-2 and 33520117-3). Cell sorting and FACS analysis were conducted on 4

1059 lasers equipped FACS Aria III cells sorter (BD). Analysis was conducted with either DIVA  
1060 software or Flowjo.

1061

## 1062 **Deterministic Fibroblast to iPSC Reprogramming experiments**

1063 Deterministic or near-deterministic iPSC reprogramming experiments were executed according to  
1064 the following protocol, unless stated otherwise; Reprogramming was initiated in mESM, which  
1065 contained 500 ml DMEM-high glucose (ThermoScientific), 15% USDA certified fetal calf serum  
1066 (Biological Industries), 1 mM L-glutamine (BI), 1% non-essential amino acids (BI), 1% penicillin–  
1067 streptomycin (BI), 0.1 mM  $\beta$ -mercaptoethanol (Sigma), 10  $\mu$ g recombinant human LIF  
1068 (Peprotech). MES medium for reprogramming was supplemented with Doxycycline (1  $\mu$ g/ml), and  
1069 the MEF<sup>2</sup> were seeded on irradiated DR4 feeders. After 3.5 days, the medium was changed to  
1070 serum-free media: referred to as KSR-2i/LIF media, which was also supplemented with  
1071 Doxycycline, as well as 2i/LIF. The medium contained- 500 ml DMEM – high glucose  
1072 (ThermoScientific), 15% Knockout Serum Replacement (KSR - ThermoScientific; 10828), 1 mM  
1073 L-Glutamine (BI), 1% non-essential amino acids (BI), 0.1 mM  $\beta$ -mercaptoethanol (Sigma), 1%  
1074 penicillin–streptomycin (BI), 10  $\mu$ g recombinant human LIF (Peprotech), CHIR99021 (3  $\mu$ M;  
1075 Axon Medchem), PD0325901 (PD, 1 $\mu$ M; Axon Medchem). Cells were seeded upon irradiated  
1076 MEF on 0.2% gelatin coated plates, at a low density of approximately 100-150 cells/cm.  
1077 Reprogramming was conducted at 5% O<sub>2</sub> 5% Co<sub>2</sub> and 37C in the first 2.5 days, and then moved  
1078 to 20% O<sub>2</sub> 5%Co<sub>2</sub> and 37C. Media replaced every other day (0, 2, 3.5, 6, 8). No blinding was  
1079 conducted when testing outcome of reprogramming experiments throughout the study. For all  
1080 mouse iPSC reprogramming experiments intended for genomics analysis, irradiated human  
1081 foreskin fibroblasts were used as feeder cells (rather than mouse DR4 MEFs), as any sequencing  
1082 input originating from the use of human feeder cells cannot be aligned to the mouse genome and is  
1083 therefore omitted from the analysis.

1084

## 1085 **Knockdown by siRNA transfection**

1086 siRNA transfections were carried using Lipofectamine RNAiMAX (ThermoScientific  
1087 #13778075), according to manufacturer protocol. Briefly, cells were seeded 24 hours before the  
1088 transfection took place, in order to achieve approximately 70% confluent adherent cells. Next, both  
1089 siRNA and Lipofectamine were diluted in Opti-MEM, in accordance to plate size (for a 6-wells

1090 plate well, 20pmole of siRNA were applied). Both the reagent and siRNA were mixed and  
1091 vortexed, then left on RT for 5 minutes; the mixture was subsequently added to cells. Cell growth  
1092 Media was changed after 24 hours, and cells for protein samples were harvested 48 hours after  
1093 transfections. When siRNA transfection was a part of a reprogramming experiment, cells were re-  
1094 transfected every 48 hours, in order to maintain the knockdown, unless stated otherwise.  
1095 Knockdown was confirmed by Western blot analysis.

1096 The siRNA used are the following-

|                                                                 |            |                                     |
|-----------------------------------------------------------------|------------|-------------------------------------|
| Mouse-Mbd3                                                      | Invitrogen | MSS-237238                          |
| Mouse-Chd3                                                      | Invitrogen | MSS238382, MSS238383, MSS238384     |
| Mouse-Chd4                                                      | Invitrogen | MSS- 200894, MSS-200895, MSS-200896 |
| Mouse-Gatad2a                                                   | Invitrogen | MSS239240, MSS239241, MSS239242     |
| Mouse-Zmynd8                                                    | Invitrogen | MSS213659, MSS213660, MSS213661     |
| Mouse- Gatad2b                                                  | Invitrogen | MSS213785, MSS213786, MSS213787     |
| Mosuse-Mta2                                                     | Invitrogen | MSS215840, MSS215841, MSS215842     |
| Mouse-Hdac2                                                     | Invitrogen | MSS205071, MSS205072, MSS205073     |
| Mouse-Mbd2                                                      | Invitrogen | MSS206540, MSS206541, MSS206542     |
| Mouse-Prkcz                                                     | Invitrogen | S71714                              |
| Stealth RNAi™<br>siRNA Scrambled<br>Negative Control,<br>Med GC | Invitrogen | 12935300                            |

1097

#### 1098 **DNA plasmids and mutants**

1099 Additional DNA plasmids used in this study for ectopic expression included: Fuv-Flag-  
1100 Mbd3 (Addgene 52371), FUW-Flag-Mbd3 delta1-70 (Addgene 52372). Newly generated plasmids  
1101 include: FUW-2XFlag- $\Delta$ CCR-Mbd3 (Deletion of 220-279), FUW-Gatad2a, FUW-Gatad2b,  
1102 pCAG-HA-Gatad2a-CCR (140-174 of Gatad2a), pCAG-HA-(MBD)Mbd3 (1-170 of Mbd3),  
1103 pCAG-HA-GFP. All new plasmids will be made available through Addgene following publication  
1104 of this manuscript.

1105

1106 **Western blot and dot blot analysis**

1107 Cells were harvested, and whole cell protein was extracted by lysis buffer, containing 150  
1108 mM NaCl, 150 mM Tris-Hcl (PH=7.4), 0.5% NP40, 1.5 mM MgCl<sub>2</sub>, 10% Glycerol. Protein's  
1109 concentration was determined by BCA Kit (ThermoScientific). Blots were incubated in the  
1110 following primary antibodies (diluted in 5% BSA in PBST):

|                 |        |                      |
|-----------------|--------|----------------------|
| Mbd3            | 1:1000 | Bethyl A302-529A     |
| Mbd2            | 1:1000 | Bethyl A301-633A     |
| Gatad2a (H-162) | 1:1000 | Santa Cruz Sc-134712 |
| Gatad2b         | 1:1000 | Bethyl A301-281A     |
| Hdac2 (c-8)     | 1:1000 | Santa Cruz sc-9959   |
| Mta2 (c-20)     | 1:500  | Santa Cruz sc-9447   |
| Chd4            | 1:1000 | Abcam Ab70469        |
| Oct4 (H-134)    | 1:1000 | Santa Cruz sc-9081   |
| Klf4 (H-180)    | 1:1000 | Santa Cruz Sc20691   |
| Nanog           | 1:1000 | Behtyl, A300-398A    |
| Flag-M2         | 1:1000 | Sigma F3165          |
| Ha.11 16B12     | 1:1000 | Covance MMS-101R     |
| Gapdh           | 1:5000 | Epitomics 2251-1     |
| Hsp90 $\beta$   | 1:1000 | Epitomics 1492-1     |
| Prmt5           | 1:1000 | Millipore 07-405     |
| Cdk2ap1 (H-4)   | 1:500  | Santa Cruz sc-390283 |
| RbAp48 (N-19)   | 1:1000 | Santa Cruz sc-8270   |
| Sall4           | 1:1000 | Abcam ab29112        |
| Ubc9            | 1:1000 | Cell signaling #4918 |
| Dnmt1           | 1:1000 | Abcam ab87654        |

1111

1112 Secondary antibodies used: Peroxide-conjugated AffiniPure goat anti-rabbit (1:10,000, 111-035-  
1113 003; Jackson ImmunoResearch). Blots were developed using SuperSignal West Pico  
1114 Chemiluminescent substrate (ThermoScientific, #34080). Dot-blot method was used to identify  
1115 small peptides expression. Briefly, protein lysate was loaded to a nitrocellulose membrane and was  
1116 left to air-dry. Membrane was then blocked by 5% milk, and later incubated with the antibody.

1117

## 1118 Real Time (RT)-PCR analysis

1119 Total RNA was extracted from the cells using Trizol. 1 µg of RNA was then reverse  
 1120 transcribed using high-capacity cDNA reverse Transcription kit (Applied Biosystems).  
 1121 Quantitative PCR was performed with 10ng of cDNA, in triplicates, on Viia7 platform (Applied  
 1122 Biosystems). Error bars indicate standard deviation of triplicate measurements for each  
 1123 measurement. The primers in use were the following:

|           |         |                                  |
|-----------|---------|----------------------------------|
| Actinb    | Forward | TTCTTTGCAGCTCCTTCGTT             |
|           | Reverse | ATGGAGGGGAATACAGCCC              |
| Gapdh     | Forward | AGTCAAGGCCGAGAATGGGAAG           |
|           | Reverse | AAGCAGTTGGTGGTGCAGGATG           |
| Oct4      | Forward | AGAGGATCACCTTGGGGTACA            |
|           | Reverse | CGAAGCGACAGATGGTGGTC             |
| Nanog     | Forward | CTCAAGTCCTGAGGCTGACA             |
|           | Reverse | TGAAACCTGTCCTTGAGTGC             |
| Sox2      | Forward | TAGAGCTAGACTCCGGGCGATGA          |
|           | Reverse | TTGCCTTAAACAAGACCACGAAA          |
| Rex1      | Forward | CCCTCGACAGACTGACCCTAA            |
|           | Reverse | TCGGGGCTAATCTCACTTTCAT           |
| Cdx2      | Forward | GCGAAACCTGTGCGAGTGGATG           |
|           | Reverse | CGGTATTTGTCTTTTGTCTGCTGGTTTCA    |
| Eomes     | Forward | TGCAAGAGAAAGCGCCTGTCTC           |
|           | Reverse | CAATCCAGCACCTTGAACGACC           |
| Fgf5      | Forward | CAAAGTCAATGGCTCCCACGAAG          |
|           | Reverse | CTACAATCCCCTGAGACACAGCAAATA      |
| Sox1      | Forward | AGTGGAAGGTCATGTCCGAG             |
|           | Reverse | TGTAATCCGGGTGTTTCCTTC            |
| Gata6     | Forward | CTTGCGGGCTCTATATGAAACTCCAT       |
|           | Reverse | TAGAAGAAGAGGAAGTAGGAGTCATAGGGACA |
| Brachyury | Forward | CTGTGACTGCCTACCAGAATGAGGAG       |
|           | Reverse | GGTCGTTTCTTTCTTTGGCATCAAG        |
| Otx2      | Forward | CTTCGGGTATGGACTTGCTG             |
|           | Reverse | CCTCATGAAGATGTCTGGGTAC           |
| Gata4     | Forward | CACAAGATGAACGGCATCAACC           |
|           | Reverse | CAGCGTGGTGGTAGTCTG               |
| C-Myc     | Forward | CCACCAGCAGCGACTCTGA              |
|           | Reverse | TGCCTCTTCTCCACAGACACC            |
| mKlf4     | Forward | GCACACCTGCGAACTCACAC             |
|           | Reverse | CCGTCCCAGTCACAGTGGTAA            |
| mSox      | Forward | ACAGATGCAACCGATGCACC             |
|           | Reverse | TGGAGTTGTA CTGCAGGGCG            |

1124

1125 **Alkaline phosphatase (AP) staining**

1126 Alkaline phosphatase (AP) staining was performed with AP kit (Millipore SCR004)  
1127 according to manufacturer protocol. Briefly, cells were fixated using 4% PFA for 2 minutes, and  
1128 later washed with TBST. The reagents were then added to the wells, followed by an incubation of  
1129 10 minutes in RT. Stained plates were scanned, and positive AP<sup>+</sup> colonies were counted to evaluate  
1130 reprogramming efficiency at differential conditions.

1131

1132 **Apoptosis detection by Annexin-PI stain**

1133 Annexin-PI staining was performed with 'The dead cell Apoptosis kit with Annexin V  
1134 Alexa Fluor 488 and Propidium Iodide' (ThermoScientific V13245), according to the manufacturer  
1135 protocol. Examined cells were stained in both Annexin and PI in order to evaluate the rate of  
1136 apoptotic and dead cells in the population. The cells were then analyzed by FACS (BD FACS ARIA  
1137 III) in order to detect cell mortality and apoptosis rates.

1138

1139 **Co-immunoprecipitation (co-IP) and proteomics analysis**

1140 When used for overexpression experiments over-expression, HEK293T were transfected  
1141 with our plasmids using JetPEI Transfection reagent (Polyplus). The cells were harvested after 48  
1142 hours, and protein interactions were examined by co-immunoprecipitation. Flag Co-  
1143 immunoprecipitation experiments were performed using Flag magnetic beads (M2, Sigma M8823).  
1144 Fresh protein extracts were incubated with the magnetic beads for 4 hours in 4 C degrees, in  
1145 rotation. The beads were washed from the unbound proteins, and then incubated with elution buffer.  
1146 The buffer contained 150mM Tris-Hcl (pH=7.4), 1.5 mM MgCl<sub>2</sub>, 150 mM NaCl, 0.5mg/ml 3Xflag  
1147 peptide (sigma, F4799). HA co-immunoprecipitation was done with the same lysis buffer, but with  
1148 Pierce anti-HA magnetic beads (ThermoScientific #88836). Elution was done with HA- peptide  
1149 (Sigma I2149). Untagged and endogenous proteins co-immunoprecipitation was carried using  
1150 protein-G Dynabeads (ThermoScientific); beads were incubated with the lysate for 4 hours in 4 C  
1151 degrees, and elution was done by heat. The elution was analyzed by western blot analysis as detailed  
1152 above or by mass-spectrometry analysis.

1153

## 1154 **Mass spectrometry sample preparation and analysis**

1155 The samples were then subjected to tryptic digestion, a process constituted from reduction,  
1156 alkylation and finally digestion with trypsin (16 hours, 37 °C, at 1:50 trypsin-protein ration).  
1157 Digestion was stopped, and the samples were desalted using solid-phase extraction columns. The  
1158 samples were then subjected to liquid chromatography coupled to high resolution, tandem mass  
1159 spectrometry (LC-MS/MS). The mobile phase used was H<sub>2</sub>O/Acetonitrile +0.1% formic acid, with  
1160 the C18 column (reverse phase column). The peptide separation was performed using T3 HSS  
1161 nano-column. Peptides were analyzed by a quadrupole orbitrap mass spectrometer, using flexion  
1162 nanospray apparatus. Data was acquired in data dependent acquisition (DDA) mode, using a Top12  
1163 method. MS1 resolution was set to 60,000 (at 400m/z) and maximum injection time was set to  
1164 120msec. MS2 resolution was set to 17,500 and maximum injection time of 60 msec. Raw data  
1165 was then imported to the Expressionist software (Genedata), and after peak detection, the peak list  
1166 was searched using the Mascot algorithm as described in (Shalit et al., 2015). Data was normalized  
1167 based on total ion current. Protein abundance was obtained by summing the three most intense,  
1168 unique peptides per protein. Minimal cut-off for protein inclusion was 'Ratio Sample/Control=3',  
1169 at least 2 unique peptides, and identification in at least 2 out of 3 repeats.

1170

## 1171 **Cell fractioning and Chromatin Extraction**

1172 The protocol for fractioning of proteins to Nucleoplasm, Cytoplasm and chromatin fraction was  
1173 previously described (Huang et al., 2009; Toiber et al., 2013). Briefly, cells were resuspended in  
1174 lysis buffer (10 mM HEPES pH 7.4, 10 mM KCl, 0.05% NP-40) and incubated 20 minutes on  
1175 ice. The lysate was then centrifuged (14,000 RPM, 10 minutes), resulting in the separation of the  
1176 nucleoplasm and the cytoplasmic fractions. Next, the pellet (containing the nuclei) is re-  
1177 suspended in Low-salt Buffer (10 mM Tris-HCl pH 7.4, 0.2 mM MgCl<sub>2</sub>, 1% Triton-X 100) and  
1178 incubated 15 minutes on ice. Subsequent centrifuge results in the separation of Chromatin and  
1179 Nucleoplasm. The pellet (containing chromatin fraction) was then resuspended in HCl 0.2N and  
1180 incubated on ice, then centrifuged. Supernatant was then kept and neutralized with Tris-HCl  
1181 pH=8 1M (1:1 ratio). All buffers were supplemented with supplemented with 20mM of N-  
1182 Ethylmaleimide (NEM - Sigma Aldrich E3876) and protease inhibitor cocktail (Sigma-Aldrich,  
1183 P8340).

1184



1185 **SUMOylation inhibition and analysis**

1186 ES cells were treated with different concentration of Ubc9-inhibitor 2-D08 (Sigma-Aldrich  
1187 SML1052) for 48 hours. Cells were then harvested and treated with NP-40 based lysis buffer,  
1188 supplemented with 20mM of N-Ethylmaleimide (NEM- Sigma E3876) and protease inhibitor  
1189 cocktail (Sigma P8340).

1190

1191 **Immunostaining of cells in culture**

1192 Cells subjected to immunostaining were washed three times with PBS and fixed with 4%  
1193 paraformaldehyde for 10 minutes at room temperature. Cells were then permeabilized and blocked  
1194 in 0.1% Triton, 0.1% Tween, and 5% FBS in PBS for 15 min at room temperature. Primary  
1195 antibodies were incubated for two hours at room temperature and then washed with 0.1% Tween  
1196 and 1% FBS in PBS three times. Next, cells were incubated with secondary antibody for one hour  
1197 at room temperature, washed and counterstained with DAPI, mounted with Shandon Immu-Mount  
1198 (ThermoScientific) and imaged. All secondary antibodies were diluted 1:200.

1199

|                 |                                      |        |
|-----------------|--------------------------------------|--------|
| Oct4 (H-134)    | Santa-Cruz SC9081                    | 1:200  |
| Nanog (397A)    | Bethyl A300-397A                     | 1:200  |
| SSEA-1 (MC-480) | Developmental Studies Hybridoma Bank | 1:20   |
| ESRRB           | R&D PP-H6705-00                      | 1:1000 |
| Flag-M2         | Sigma F3165                          | 1:500  |
| Gatad2a (H-162) | Santa Cruz Sc-134712                 | 1:200  |

1200

1201 **Teratoma assay**

1202 iPSCs or ESCs grown in N2B27 2i/LIF cell lines were expanded for over 8 passages and  
1203 injected subcutaneously to the flanks of immune deficient NSG mice. After 4-6 weeks, all injected  
1204 mice were sacrificed and the tumor mass extracted and fixed in 4% paraformaldehyde over-night.  
1205 Slides were prepared from the paraffin embedded fixed tissue, which were next Hematoxylin &  
1206 Eosin stained and inspected for representation of all three germ layers and confirmed by a pathology  
1207 expert.

## 1208 **Mouse embryo micromanipulation**

1209 Pluripotent ESCs/iPSCs were injected into BDF2 diploid blastocysts, harvested from  
1210 hormone primed BDF1 6-week-old females. Microinjection into BDF2 E3.5 blastocysts placed in  
1211 M2 medium under mineral oil was done by a flat-tip microinjection pipette. A controlled number  
1212 of 10-12 cells were injected into the blastocyst cavity. After injection, blastocysts were returned to  
1213 KSOM media (Zenith) and placed at 37°C until transferred to recipient females. Ten to fifteen  
1214 injected blastocysts were transferred to each uterine horn of 2.5 days post coitum pseudo-pregnant  
1215 females. All animal experiments described herein were approved by relevant Weizmann Institute  
1216 IACUC (#00330111).

1217

## 1218 **PolyA-RNA-seq library preparation and analysis**

1219 Total RNA was isolated from indicated cell lines and extracted from Trizol pellets by  
1220 Direct-zol RNA MiniPrep kit (Zymo), then utilized for RNA-Seq by TruSeq RNA Sample  
1221 Preparation Kit v2 (Illumina) according to manufacturer's instruction. RNA-seq data are deposited  
1222 under GEO no. GSE102518. Tophat software version 2.0.10 was used to align reads to mouse  
1223 mm10 reference genome (UCSC, December 2011). FPKM values were calculated over all genes  
1224 in mm10 assembly GTF (UCSC, December 2011), using cufflinks (version 2.2.1). Genes with  
1225 minimal expressed (FPKM>1) in at least one time point in each of the systems (Gatad2a-  
1226 KO/WT/WT\*) were selected for clustering and PCA, resulting in 9,756 active genes . Unit  
1227 normalized FPKM was calculated using the following formula  $R_j^{i*} = R_j^i / [\max_j(R_j^i)+1]$  where j is  
1228 the sample index, i is the gene index and FPKM=1 is the transcription noise threshold, and  $\max_j(R_j^i)$   
1229 is the maximal level in each dataset. Hierarchical clustering was carried out using R pheatmap  
1230 command. PCA analysis was carried out over the same set of 9,756 genes in unit normalization by  
1231 R pcomp command.

1232

## 1233 **ATAC-seq library preparation and analysis**

1234 Cells were trypsinized and counted, 50,000 cells were centrifuged at 500g for 3 min,  
1235 followed by a wash using 50  $\mu$ l of cold PBS and centrifugation at 500g for 3 min. Cells were lysed  
1236 using cold lysis buffer (10 mM Tris-HCl, pH 7.4, 10 mM NaCl, 3 mM MgCl<sub>2</sub> and 0.1% IGEPAL

1237 CA-630). Immediately after lysis, nuclei were spun at 500g for 10 min using a refrigerated  
1238 centrifuge. Next, the pellet was resuspended in the transposase reaction mix (25  $\mu$ l 2 $\times$  TD buffer,  
1239 2.5  $\mu$ l transposase (Illumina) and 22.5  $\mu$ l nuclease-free water). The transposition reaction was  
1240 carried out for 30 min at 37 °C and immediately put on ice. Directly afterwards, the sample was  
1241 purified using a Qiagen MinElute kit. Following purification, the library fragments were amplified  
1242 using custom Nextera PCR primers 1 and 2 for a total of 12 cycles. Following PCR amplification,  
1243 the libraries were purified using a *Qiagen*MinElute Kit and sequenced.

1244 For ATAC-seq analysis, Reads were aligned to mm10 mouse genome using Bowtie2 with  
1245 the parameter -X2000 (allowing fragments up to 2 kb to align). Duplicated aligned reads were  
1246 removed using Picard MarkDuplicates tool with the command REMOVE\_DUPLICATES=true. To  
1247 identify chromatin accessibility signal we considered only short reads ( $\leq$  100bp) that correspond to  
1248 nucleosome free region. To detect and separate accessible loci in each sample, we used MACS  
1249 version 1.4.2-1 with --call-subpeaks flag (PeakSplitter version 1.0). Next, summits in previously  
1250 annotated spurious regions were filtered out using a custom blacklist targeted at mitochondrial  
1251 homologues. To develop this blacklist, we generated 10,000,000 synthetic 34mer reads derived  
1252 from the mitochondrial genome. After mapping and peak calling of these synthetic reads we found  
1253 28 high-signal peaks for the mm10 genome. For all subsequent analysis, we discarded peaks falling  
1254 within these regions.

1255

## 1256 **Enhancer Identification**

1257 H3K27ac peaks were detected using MACS version 1.4.2-1 and merged for all time points  
1258 using bedtools merge command. All ATAC peaks were filtered to include only peaks which co-  
1259 localized with the merged H3K27ac peaks, meaning only ATAC peaks that have H3K27ac mark  
1260 on at least one of the time points were passed to further processing. Finally, the peaks from all  
1261 samples were unified and merged (using bedtools unionbedg and merge commands), further filtered  
1262 to reject peaks that co-localized with promoter or exon regions based on mm10 assembly (UCSC,  
1263 December 2011). Finally, we were left with 52,473 genomic intervals which we annotated as active  
1264 enhancers.

1265 Enhancers were considered as differential if both their ATAC-seq and H3K27ac signals  
1266 show significant change during reprogramming (min z-score<0.5, max z-score>1.5, for both

1267 chromatin marks). 12,153 enhancers were found to be differential and were used for correlation  
1268 analysis (**Fig. 4C**). Z-scores were calculated as following: Shortly, the genomic interval is divided  
1269 to 50bp size bins, and the coverage in each bin is estimated. Each bin is then converted to z-score  
1270 by normalizing each position by the mean and standard deviation of the sample noise ( $\hat{X}_j = (X_j -$   
1271  $\mu_{\text{noise}}) / \sigma_{\text{noise}}$ ). Noise parameters were estimated for each sample from  $6 \times 10^7$  random bp across the  
1272 genome. Finally, the 3<sup>rd</sup> highest bin z-score of each interval is set to represent the coverage of that  
1273 interval. ATAC-seq data are deposited under GEO no. GSE102518.

1274

### 1275 **Whole-Genome Bisulfite Sequencing (WGBS) Library preparation and analysis**

1276 DNA was isolated from snap-frozen cells using the Quick-gDNA mini prep kit (Zymo).  
1277 DNA was then converted by bisulfite using the EZ DNA Methylation-Gold kit (Zymo). Sequencing  
1278 libraries were created using the EpiGenome Methyl-Seq (Epicenter) and sequenced. The  
1279 sequencing reads were aligned to the mouse mm10 reference genome (UCSC, December 2011),  
1280 using a proprietary script based on Bowtie2. In cases where the two reads were not aligned in a  
1281 concordant manner, the reads were discarded. Methylation levels of CpGs calculated by RRBS and  
1282 WGBS were unified. Mean methylation was calculated for each CpG that was covered by at least  
1283 5 distinct reads (X5). Average methylation level in various genomic intervals was calculating by  
1284 taking the average over all covered X5 covered CpG sites in that interval. WGBS data are available  
1285 to download from NCBI GEO, under super-series GSE102518.

1286

### 1287 **ChIP-seq library preparation and analysis**

1288 Cells were crosslinked in formaldehyde (1% final concentration, 10 min at room  
1289 temperature), and then quenched with glycine (5 min at room temperature). Fixated cells were then  
1290 lysed in 50 mM HEPES KOH pH 7.5, 140 mM NaCl, 1 mM EDTA, 10% glycerol, 0.5% NP-40  
1291 alternative, 0.25% Triton supplemented with protease inhibitor at 4 °C (Roche, 04693159001),  
1292 centrifuged at 950g for 10 min and re-suspended in 0.2% SDS, 10 mM EDTA, 140 mM NaCl and  
1293 10 mM Tris-HCl. Cells were then fragmented with a Branson Sonifier (model S-450D) at -4 °C to  
1294 size ranges between 200 and 800 bp and precipitated by centrifugation. Antibody was pre-bound  
1295 by incubating with Protein-G Dynabeads (Invitrogen 100-07D) in blocking buffer (PBS  
1296 supplemented with 0.5% TWEEN and 0.5% BSA) for 1 h at room temperature. Washed beads were

1297 added to the chromatin lysate for incubation as detailed in the table below. Samples were washed  
1298 five times with RIPA buffer, twice with RIPA buffer supplemented with 500 mM NaCl, twice with  
1299 LiCl buffer (10 mM TE, 250mM LiCl, 0.5% NP-40, 0.5% DOC), once with TE (10Mm Tris-HCl  
1300 pH 8.0, 1mM EDTA), and then eluted in 0.5% SDS, 300 mM NaCl, 5 mM EDTA, 10 mM Tris HCl  
1301 pH 8.0. Eluate was incubated treated sequentially with RNaseA (Roche, 11119915001) for 30 min  
1302 and proteinase K (NEB, P8102S) for 2 h in 65 °C for 8 h, and then. DNA was purified with The  
1303 Agencourt AMPure XP system (Beckman Coulter Genomics, A63881). Libraries of cross-reversed  
1304 ChIP DNA samples were prepared according to a modified version of the Illumina Genomic DNA  
1305 protocol, as described previously. ChIP-seq data are available to download from NCBI GEO, under  
1306 super-series GSE102518.

1307 Alignment and peak detection: We used bowtie2 software to align reads to mouse mm10  
1308 reference genome (UCSC, December 2011), with default parameters. We identified enriched  
1309 intervals of all measured proteins using MACS version 1.4.2-1. We used sequencing of whole-cell  
1310 extract as control to define a background model. Duplicate reads aligned to the exact same location  
1311 are excluded by MACS default configuration.

1312 Chromatin modification profile estimation in TSS, TES and in enhancers: H3K27ac  
1313 modification coverage in the genomic intervals was calculated using in-house script. Shortly, the  
1314 genomic interval is divided to 50bp size bins, and the coverage in each bin is estimated. Each bin  
1315 is then converted to z-score by normalizing by the mean and standard deviation of the sample noise  
1316 ( $X^j = (X_j - \mu_{\text{noise}}) / \sigma_{\text{noise}}$ ). Noise parameters were estimated for each sample from  $6 \cdot 10^7$  random bp  
1317 across the genome. Finally, the 3<sup>rd</sup> highest bin z-score of each interval is set to represent the  
1318 coverage of that interval.

1319

|         |                               |           |
|---------|-------------------------------|-----------|
| H3K27ac | Abcam ab4729                  | 6H        |
| Oct4    | Santa Cruz SC8628             | Overnight |
| Klf4    | R&D AF3158                    | Overnight |
| Sox2    | Millipore AB5603              | Overnight |
| C-Myc   | Santa Cruz sc764              | Overnight |
| Chd4    | Abcam ab70469                 | Overnight |
| Mbd3    | Bethyl laboratories A302-5289 | Overnight |

1320

1321 **Microscopy live image acquisition and analysis**

1322 Isogenic secondary OKSM inducible Gatad2a-KO and Gatad2a-WT secondary MEFs  
1323 harboring  $\Delta$ PE-Oct4-GFP pluripotency reporter and constitutively expressed nuclear mCherry  
1324 marker (**Fig. S2A**), were plated in 24-well plates at low densities (~120 cells per well).  
1325 Reprogramming was then imaged (beginning 72 hours after DOX administration) using  
1326 AxioObserver Z1 (Zeiss) in %5 O<sub>2</sub>, %5 CO<sub>2</sub>, 37C controlled conditions. Plates were taken out at  
1327 day 3.5 for media replacement (without passaging/splitting) and put back for the automated live  
1328 imaging stage. Full well mosaic images were taken every 12 hours for 4 days (days 3-7 of  
1329 reprogramming) at 5x magnification, including phase contrast and two fluorescent wavelength  
1330 images.

1331

1332 **Data Availability**

1333 All RNA-seq, ATAC-seq, CHIP-seq and WGBS methylation data are available to download from  
1334 NCBI GEO, under super-series GSE102518. They will be publically released upon printed  
1335 publication of this study after peer review or following special requests.

1336

1337

1338

1339

1340

1341

1342

1343

1344

1345

## 1346 **References**

- 1347 Allen, H.F., Wade, P.A., and Kutateladze, T.G. (2013). The NuRD architecture. *Cell. Mol. Life*  
1348 *Sci.* *70*, 3513–3524.
- 1349 Alqarni, S.S.M., Murthy, A., Zhang, W., Przewloka, M.R., Silva, A.P.G., Watson, A.A., Lejon,  
1350 S., Pei, X.Y., Smits, A.H., Kloet, S.L., et al. (2014). Insight into the architecture of the NuRD  
1351 complex: Structure of the RbAp48-MTA1 subcomplex. *J. Biol. Chem.* *289*, 21844–21855.
- 1352 Bao, S., Tang, F., Li, X., Hayashi, K., Gillich, A., Lao, K., and Surani, M.A. (2009). Epigenetic  
1353 reversion of post-implantation epiblast to pluripotent embryonic stem cells. *Nature* *461*, 1292–  
1354 1295.
- 1355 Bar-Nur, O., Brumbaugh, J., Verheul, C., Apostolou, E., Pruteanu-Malinici, I., Walsh, R.M.,  
1356 Ramaswamy, S., and Hochedlinger, K. (2014). Small molecules facilitate rapid and synchronous  
1357 iPSC generation. *Nat. Methods* *11*, 1170–1176.
- 1358 Baubec, T., Ivánek, R., Lienert, F., and Schübeler, D. (2013). Methylation-dependent and -  
1359 independent genomic targeting principles of the mbd protein family. *Cell* *153*, 480–492.
- 1360 van den Berg, D.L.C., Snoek, T., Mullin, N.P., Yates, A., Bezstarosti, K., Demmers, J.,  
1361 Chambers, I., and Poot, R.A. (2010). An Oct4-Centered Protein Interaction Network in  
1362 Embryonic Stem Cells. *Cell Stem Cell* *6*, 369–381.
- 1363 Bode, D., Yu, L., Tate, P., Pardo, M., and Choudhary, J. (2016). Characterization of Two Distinct  
1364 Nucleosome Remodeling and Deacetylase (NuRD) Complex Assemblies in Embryonic Stem  
1365 Cells. *Mol. Cell. Proteomics* *15*, 878–891.
- 1366 Boiani, M., Kehler, J., and Schöler, H.R. (2004). Activity of the Germline-Specific Oct4-GFP  
1367 Transgene in Normal and Clone Mouse Embryos. In *METHODS IN MOLECULAR BIOLOGY-*  
1368 *...*, (New Jersey: Humana Press), pp. 1–34.
- 1369 Borkent, M., Bennett, B.D., Lackford, B., Bar-Nur, O., Brumbaugh, J., Wang, L., Du, Y., Fargo,  
1370 D.C., Apostolou, E., Cheloufi, S., et al. (2016). A Serial shRNA Screen for Roadblocks to  
1371 Reprogramming Identifies the Protein Modifier SUMO2. *Stem Cell Reports* *6*, 704–716.
- 1372 Brons, I., Clarkson, A., Ahrlund-Richter, L., and Pedersen, R.A. (2007). Derivation of pluripotent  
1373 epiblast stem cells from mammalian embryos : Article : *Nature*.
- 1374 Busmann, L.H., Schubert, A., Vu Manh, T.P., De Andres, L., Desbordes, S.C., Parra, M.,  
1375 Zimmermann, T., Rapino, F., Rodríguez-Ubrea, J., Ballestar, E., et al. (2009). A robust and  
1376 highly efficient immune cell reprogramming system. *Cell Stem Cell* *5*, 554–566.
- 1377 Carey, B.W., Markoulaki, S., Beard, C., Hanna, J., and Jaenisch, R. (2010). Single-gene  
1378 transgenic mouse strains for reprogramming adult somatic cells. *Nat. Methods* *7*, 56–59.
- 1379 Cheloufi, S., Elling, U., Hopfgartner, B., Jung, Y.L., Murn, J., Ninova, M., Hubmann, M.,  
1380 Badeaux, A.I., Ang, C.E., Tenen, D., et al. (2015). The histone chaperone CAF-1 safeguards  
1381 somatic cell identity. *Nature* *528*, 218–224.
- 1382 Dutta, D., Ray, S., Home, P., Larson, M., Wolfe, M.W., and Paul, S. (2011). Self-Renewal Versus  
1383 Lineage Commitment of Embryonic Stem Cells: Protein Kinase C Signaling Shifts the Balance.  
1384 *Stem Cells* *29*, 618–628.

- 1385 Efe, J.A., Hilcove, S., Kim, J., Zhou, H., Ouyang, K., Wang, G., Chen, J., and Ding, S. (2011).  
1386 Conversion of mouse fibroblasts into cardiomyocytes using a direct reprogramming strategy. *Nat.*  
1387 *Cell Biol.* *13*, 215–222.
- 1388 Eggan, K. (2013). Picking the Lock on Pluripotency. *N. Engl. J. Med.* *369*, 2150–2151.
- 1389 Festuccia, N., Osorno, R., Halbritter, F., Karwacki-Neisius, V., Navarro, P., Colby, D., Wong, F.,  
1390 Yates, A., Tomlinson, S.R., and Chambers, I. (2012). Esrrb Is a Direct Nanog Target Gene that  
1391 Can Substitute for Nanog Function in Pluripotent Cells. *Cell Stem Cell* *11*, 477–490.
- 1392 Fidalgo, M., Shekar, P.C., Ang, Y.S., Fujiwara, Y., Orkin, S.H., and Wang, J. (2011). Zfp281  
1393 functions as a transcriptional repressor for pluripotency of mouse embryonic stem cells. *Stem*  
1394 *Cells* *29*, 1705–1716.
- 1395 Fidalgo, M., Faiola, F., Pereira, C.-F., Ding, J., Saunders, A., Gingold, J., Schaniel, C.,  
1396 Lemischka, I.R., Silva, J.C.R., and Wang, J. (2012). Zfp281 mediates Nanog autorepression  
1397 through recruitment of the NuRD complex and inhibits somatic cell reprogramming. *Proc. Natl.*  
1398 *Acad. Sci.* *109*, 16202–16207.
- 1399 Gafni, O., Weinberger, L., Mansour, A.A., Manor, Y.S., Chomsky, E., Ben-Yosef, D., Kalma, Y.,  
1400 Viukov, S., Maza, I., Zviran, A., et al. (2013). Derivation of novel human ground state naive  
1401 pluripotent stem cells. *Nature* *504*, 282–286.
- 1402 Geula, S., Moshitch-Moshkovitz, S., Dominissini, D., Mansour, A.A., Kol, N., Salmon-Divon,  
1403 M., Hershkovitz, V., Peer, E., Mor, N., Manor, Y.S., et al. (2015). m6A mRNA methylation  
1404 facilitates resolution of naive pluripotency toward differentiation. *Science* (80-. ). *347*, 1002–  
1405 1006.
- 1406 Gnanapragasam, M.N., Scarsdale, J.N., Amaya, M.L., Webb, H.D., Desai, M.A., Walavalkar,  
1407 N.M., Wang, S.Z., Zu Zhu, S., Ginder, G.D., and Williams, D.C. (2011). p66 -MBD2 coiled-coil  
1408 interaction and recruitment of Mi-2 are critical for globin gene silencing by the MBD2-NuRD  
1409 complex. *Proc. Natl. Acad. Sci.* *108*, 7487–7492.
- 1410 Gong, Z., Brackertz, M., and Renkawitz, R. (2006). SUMO Modification Enhances p66-Mediated  
1411 Transcriptional Repression of the Mi-2/NuRD Complex. *Mol. Cell. Biol.* *26*, 4519–4528.
- 1412 Greber, B., Wu, G., Bernemann, C., Joo, J.Y., Han, D.W., Ko, K., Tapia, N., Sabour, D.,  
1413 Sternecker, J., Tesar, P., et al. (2010). Conserved and Divergent Roles of FGF Signaling in  
1414 Mouse Epiblast Stem Cells and Human Embryonic Stem Cells. *Cell Stem Cell* *6*, 215–226.
- 1415 Le Guezennec, X., Vermeulen, M., Brinkman, A.B., Hoeijmakers, W.A.M., Cohen, A., Lasonder,  
1416 E., and Stunnenberg, H.G. (2006). MBD2/NuRD and MBD3/NuRD, Two Distinct Complexes  
1417 with Different Biochemical and Functional Properties. *Mol. Cell. Biol.* *26*, 843–851.
- 1418 Gurdon, J. (2009). Nuclear reprogramming in eggs. *Nat. Med.* *15*, 1141–1144.
- 1419 Habibi, E., Brinkman, A.B., Arand, J., Kroeze, L.I., Kerstens, H.H.D., Matarese, F., Lepikhov,  
1420 K., Gut, M., Brun-Heath, I., Hubner, N.C., et al. (2013). Short Article. *Cell Stem Cell* 1–10.
- 1421 Han, D.W., Ko, K., Wu, G., Stehling, M., Do, J.T., and Schöler, H.R. (2010). ScienceDirect.com  
1422 - Cell - Epiblast Stem Cell Subpopulations Represent Mouse Embryos of Distinct Pregastrulation  
1423 Stages. *Cell*.
- 1424 Hanna, J., Markoulaki, S., Schorderet, P., Carey, B.W., Beard, C., Wernig, M., Creighton,



- 1425 M.P.P., Steine, E.J., Cassady, J.P., Foreman, R., et al. (2008). Direct Reprogramming of  
1426 Terminally Differentiated Mature B Lymphocytes to Pluripotency. *Cell* *133*, 250–264.
- 1427 Hanna, J., Saha, K., Pando, B., van Zon, J., Lengner, C.J., Creighton, M.P., van Oudenaarden,  
1428 A., and Jaenisch, R. (2009). Direct cell reprogramming is a stochastic process amendable to  
1429 acceleration. *Nature* *462*, 595–601.
- 1430 Hanna, J.H., Saha, K., and Jaenisch, R. (2010). Pluripotency and cellular reprogramming: Facts,  
1431 hypotheses, unresolved issues. *Cell* *143*, 508–525.
- 1432 Hayashi, K., Ohta, H., Kurimoto, K., Aramaki, S., and Saitou, M. (2011). Reconstitution of the  
1433 mouse germ cell specification pathway in culture by pluripotent stem cells. *Cell* *146*, 519–532.
- 1434 Hochedlinger, K., Yamada, Y., Beard, C., and Jaenisch, R. (2005). Ectopic expression of Oct-4  
1435 blocks progenitor-cell differentiation and causes dysplasia in epithelial tissues. *Cell* *121*, 465–  
1436 477.
- 1437 Hosokawa, H., Tanaka, T., Suzuki, Y., Iwamura, C., Ohkubo, S., Endoh, K., Kato, M., Endo, Y.,  
1438 Onodera, A., Tumes, D.J., et al. (2013). Functionally distinct Gata3/Chd4 complexes coordinately  
1439 establish T helper 2 (Th2) cell identity. *Proc. Natl. Acad. Sci.* *110*, 4691–4696.
- 1440 Huang, J., Huen, M.S.Y., Kim, H., Leung, C.C.Y., Glover, J.N.M., Yu, X., and Chen, J. (2009).  
1441 RAD18 transmits DNA damage signalling to elicit homologous recombination repair. *Nat. Cell*  
1442 *Biol.* *11*, 592–603.
- 1443 Hussein, S.M.I., Puri, M.C., Tonge, P.D., Benevento, M., Corso, A.J., Clancy, J.L., Mosbergen,  
1444 R., Li, M., Lee, D.S., Cloonan, N., et al. (2014). Genome-wide characterization of the routes to  
1445 pluripotency. *Nature* *516*, 198–206.
- 1446 Ichida, J.K., Julia, T.C.W., Williams, L.A., Carter, A.C., Shi, Y., Moura, M.T., Ziller, M., Singh,  
1447 S., Amabile, G., Bock, C., et al. (2014). Notch inhibition allows oncogene-independent  
1448 generation of iPS cells. *Nat. Chem. Biol.* *10*, 632–639.
- 1449 Jullien, J., Miyamoto, K., Pasque, V., Allen, G.E., Bradshaw, C.R., Garrett, N.J., Halley-Stott,  
1450 R.P., Kimura, H., Ohsumi, K., and Gurdon, J.B. (2014). Hierarchical Molecular Events Driven by  
1451 Oocyte-Specific Factors Lead to Rapid and Extensive Reprogramming. *Mol. Cell* 1–27.
- 1452 Kaji, K., Caballero, I.M., MacLeod, R., Nichols, J., Wilson, V.A., and Hendrich, B. (2006). The  
1453 NuRD component Mbd3 is required for pluripotency of embryonic stem cells. *Nat. Cell Biol.* *8*,  
1454 285–292.
- 1455 Kaji, K., Nichols, J., and Hendrich, B. (2007). Mbd3, a component of the NuRD co-repressor  
1456 complex, is required for development of pluripotent cells. *Development* *134*, 1123–1132.
- 1457 Leitch, H.G., McEwen, K.R., Turp, A., Encheva, V., Carroll, T., Grabole, N., Mansfield, W.,  
1458 Nashun, B., Knezovich, J.G., Smith, A., et al. (2013). Naive pluripotency is associated with  
1459 global DNA hypomethylation. *Nat. Struct. Mol. Biol.* *20*, 311–316.
- 1460 Liu, L.L., Brumbaugh, J., Bar-Nur, O., Smith, Z., Stadtfeld, M., Meissner, A., Hochedlinger, K.,  
1461 and Michor, F. (2016). Probabilistic Modeling of Reprogramming to Induced Pluripotent Stem  
1462 Cells. *Cell Rep.* *17*, 3395–3406.
- 1463 Lujan, E., Zunder, E.R., Ng, Y.H., Goronzy, I.N., Nolan, G.P., and Wernig, M. (2015). Early  
1464 reprogramming regulators identified by prospective isolation and mass cytometry. *Nature* *521*,

- 1465 352–356.
- 1466 Luo, M., Ling, T., Xie, W., Sun, H., Zhou, Y., Zhu, Q., Shen, M., Zong, L., Lyu, G., Zhao, Y., et  
1467 al. (2013a). NuRD blocks reprogramming of mouse somatic cells into Pluripotent stem cells.  
1468 *Stem Cells* *31*, 1278–1286.
- 1469 Luo, M., Ling, T., Xie, W., Sun, H., Zhou, Y., Zhu, Q., Shen, M., Zong, L., Lyu, G., Zhao, Y., et  
1470 al. (2013b). NuRD Blocks Reprogramming of Mouse Somatic Cells into Pluripotent Stem  
1471 Cells. *Stem Cells* *31*, N/A--N/A.
- 1472 Ma, H., Morey, R., O’Neil, R.C., He, Y., Daughtry, B., Schultz, M.D., Hariharan, M., Nery, J.R.,  
1473 Castanon, R., Sabatini, K., et al. (2014). Abnormalities in human pluripotent cells due to  
1474 reprogramming mechanisms. *511*, 177–183.
- 1475 Marino, S., and Nusse, R. (2007). Mutants in the Mouse NuRD/Mi2 Component P66 $\alpha$  Are  
1476 Embryonic Lethal. *PLoS One* *2*.
- 1477 Martello, G., Sugimoto, T., Diamanti, E., Joshi, A., Hannah, R., Ohtsuka, S., Göttgens, B., Niwa,  
1478 H., and Smith, A. (2012). Esrrb Is a Pivotal Target of the Gsk3/Tcf3 Axis Regulating Embryonic  
1479 Stem Cell Self-Renewal. *Cell Stem Cell* *11*, 491–504.
- 1480 Masika, H., Farago, M., Hecht, M., Condiotti, R., Makedonski, K., Buganim, Y., Burstyn-Cohen,  
1481 T., Bergman, Y., and Cedar, H. (2017). Programming asynchronous replication in stem cells. *Nat.*  
1482 *Struct. Mol. Biol.* *24*, 1132–1138.
- 1483 Mikkelsen, T.S., Hanna, J., Zhang, X., Ku, M., Wernig, M., Schorderet, P., Bernstein, B.E.,  
1484 Jaenisch, R., Lander, E.S., and Meissner, A. (2008). Dissecting direct reprogramming through  
1485 integrative genomic analysis. *Nature* *454*, 49–55.
- 1486 Miller, A., Ralser, M., Kloet, S.L., Loos, R., Nishinakamura, R., Bertone, P., Vermeulen, M., and  
1487 Hendrich, B. (2016). Sall4 controls differentiation of pluripotent cells independently of the  
1488 Nucleosome Remodelling and Deacetylation (NuRD) complex. *Development* *143*, 3074–3084.
- 1489 Najm, F.J., Chenoweth, J.G., Anderson, P.D., Nadeau, J.H., Redline, R.W., McKay, R.D.G., and  
1490 Tesar, P.J. (2011). Isolation of Epiblast Stem Cells from Preimplantation Mouse Embryos. *Cell*  
1491 *Stem Cell* *8*, 318–325.
- 1492 Nitarska, J., Smith, J.G., Sherlock, W.T., Hillege, M.M.G., Nott, A., Barshop, W.D., Vashisht,  
1493 A.A., Wohlschlegel, J.A., Mitter, R., and Riccio, A. (2016). A Functional Switch of NuRD  
1494 Chromatin Remodeling Complex Subunits Regulates Mouse Cortical Development. *Cell Rep.* *17*,  
1495 1683–1698.
- 1496 O’Shaughnessy-Kirwan, A., Signolet, J., Costello, I., Gharbi, S., and Hendrich, B. (2015).  
1497 Constraint of gene expression by the chromatin remodelling protein CHD4 facilitates lineage  
1498 specification. *Development* *142*, 2586–2597.
- 1499 Polo, S.E., Kaidi, A., Baskcomb, L., Galanty, Y., and Jackson, S.P. (2010). Regulation of DNA-  
1500 damage responses and cell-cycle progression by the chromatin remodelling factor CHD4. *EMBO*  
1501 *J.* *29*, 3130–3139.
- 1502 Qiu, D., Ye, S., Ruiz, B., Zhou, X., Liu, D., Zhang, Q., and Ying, Q.-L. (2015). Klf2 and Tfcp2l1,  
1503 Two Wnt/ $\beta$ -Catenin Targets, Act Synergistically to Induce and Maintain Naive  
1504 Pluripotency. *Stem Cell Reports* *5*, 1–9.

- 1505 Rais, Y., Zviran, A., Geula, S., Gafni, O., Chomsky, E., Viukov, S., Mansour, A.A., Caspi, I.,  
1506 Krupalnik, V., Zerbib, M., et al. (2013). Deterministic direct reprogramming of somatic cells to  
1507 pluripotency. *Nature* *502*, 65–70.
- 1508 Rajendran, G., Dutta, D., Hong, J., Paul, A., Saha, B., Mahato, B., Ray, S., Home, P., Ganguly,  
1509 A., Weiss, M.L., et al. (2013). Inhibition of protein kinase C signaling maintains rat embryonic  
1510 stem cell pluripotency. *J. Biol. Chem.* *288*, 24351–24362.
- 1511 Reynolds, N., Latos, P., Hynes-Allen, A., Loos, R., Leaford, D., O’Shaughnessy, A., Mosaku, O.,  
1512 Signolet, J., Brennecke, P., Kalkan, T., et al. (2012). NuRD suppresses pluripotency gene  
1513 expression to promote transcriptional heterogeneity and lineage commitment. *Cell Stem Cell* *10*,  
1514 583–594.
- 1515 Sakai, H., Urano, T., Ookata, K., Kim, M.H., Hirai, Y., Saito, M., Nojima, Y., and Ishikawa, F.  
1516 (2002). MBD3 and HDAC1, two components of the NuRD complex, are localized at aurora-A-  
1517 positive centrosomes in M phase. *J. Biol. Chem.* *277*, 48714–48723.
- 1518 Dos Santos, R.L., Tosti, L., Radziszewska, A., Caballero, I.M., Kaji, K., Hendrich, B., and  
1519 Silva, J.C.R. (2014). MBD3/NuRD facilitates induction of pluripotency in a context-dependent  
1520 manner. *Cell Stem Cell* *15*, 102–110.
- 1521 Shalit, T., Elinger, D., Savidor, A., Gabashvili, A., and Levin, Y. (2015). MS1-based label-free  
1522 proteomics using a quadrupole orbitrap mass spectrometer. *J. Proteome Res.* *14*, 1979–1986.
- 1523 Shimizu, T., Ueda, J., Ho, J.C., Iwasaki, K., Poellinger, L., Harada, I., and Sawada, Y. (2012).  
1524 Dual Inhibition of Src and GSK3 Maintains Mouse Embryonic Stem Cells, Whose Differentiation  
1525 Is Mechanically Regulated by Src Signaling. *Stem Cells* *30*, 1394–1404.
- 1526 Shu, J., Wu, C., Wu, Y., Li, Z., Shao, S., Zhao, W., Tang, X., Yang, H., Shen, L., Zuo, X., et al.  
1527 (2013). Induction of Pluripotency in Mouse Somatic Cells with Lineage Specifiers. *Cell* *153*,  
1528 963–975.
- 1529 Singhal, N., Graumann, J., Wu, G., Araúzo-Bravo, M.J., Han, D.W., Greber, B., Gentile, L.,  
1530 Mann, M., and Schöler, H.R. (2010). Chromatin-remodeling components of the baf complex  
1531 facilitate reprogramming. *Cell* *141*, 943–955.
- 1532 Smith, Z.D., Sindhu, C., and Meissner, A. (2016). Molecular features of cellular reprogramming  
1533 and development. *Nat. Rev. Mol. Cell Biol.* *17*, 139–154.
- 1534 Smits, A.H., Jansen, P.W.T.C., Poser, I., Hyman, A.A., and Vermeulen, M. (2013). Stoichiometry  
1535 of chromatin-associated protein complexes revealed by label-free quantitative mass spectrometry-  
1536 based proteomics. *Nucleic Acids Res.* *41*.
- 1537 Sommer, C.A., Stadtfeld, M., Murphy, G.J., Hochedlinger, K., Kotton, D.N., and Mostoslavsky,  
1538 G. (2009). Induced pluripotent stem cell generation using a single lentiviral stem cell cassette.  
1539 *Stem Cells* *27*, 543–549.
- 1540 Spruijt, C.G., Bartels, S.J.J., Brinkman, A.B., Tjeertes, J. V., Poser, I., Stunnenberg, H.G., and  
1541 Vermeulen, M. (2010). CDK2AP1/DOC-1 is a bona fide subunit of the Mi-2/NuRD complex.  
1542 *Mol. Biosyst.* *6*, 1700.
- 1543 Spruijt, C.G., Luijsterburg, M.S., Menafrá, R., Lindeboom, R.G.H., Jansen, P.W.T.C.,  
1544 Edupuganti, R.R., Baltissen, M.P., Wiegant, W.W., Voelker-Albert, M.C., Matarese, F., et al.

- 1545 (2016). ZMYND8 Co-localizes with NuRD on Target Genes and Regulates Poly(ADP-Ribose)-  
1546 Dependent Recruitment of GATAD2A/NuRD to Sites of DNA Damage. *Cell Rep.* *17*, 783–798.
- 1547 Stadtfeld, M., Maherali, N., Borkent, M., and Hochedlinger, K. (2010). A reprogrammable mouse  
1548 strain from gene-targeted embryonic stem cells. *Nat. Methods* *7*, 53–55.
- 1549 Di Stefano, B., Sardina, J.L., Van Oevelen, C., Collombet, S., Kallin, E.M., Vicent, G.P., Lu, J.,  
1550 Thieffry, D., Beato, M., and Graf, T. (2013). C/EBP $\alpha$  poises B cells for rapid reprogramming into  
1551 induced pluripotent stem cells. *Nature* *506*, 1–17.
- 1552 Di Stefano, B., Collombet, S., Jakobsen, J.S., Wierer, M., Sardina, J.L., Lackner, A., Stadhouders,  
1553 R., Segura-Morales, C., Francesconi, M., Limone, F., et al. (2016). C/EBP $\alpha$  creates elite cells for  
1554 iPSC reprogramming by upregulating Klf4 and increasing the levels of Lsd1 and Brd4. *Nat. Cell*  
1555 *Biol.* *18*, 371–381.
- 1556 Szabo, E., Rampalli, S., Risueño, R.M., Schnerch, A., Mitchell, R., Fiebig-Comyn, A., Levadoux-  
1557 Martin, M., and Bhatia, M. (2010). Direct conversion of human fibroblasts to multilineage blood  
1558 progenitors. *Nature* *468*, 521–526.
- 1559 Tachibana, M., Amato, P., Sparman, M., Gutierrez, N.M., Tippner-Hedges, R., Ma, H., Kang, E.,  
1560 Fulati, a, Lee, H.S., Sritanaudomchai, H., et al. (2013). Human embryonic stem cells derived by  
1561 somatic cell nuclear transfer. *Cell* *153*, 1228–1238.
- 1562 Takahashi, K., and Yamanaka, S. (2006). Induction of Pluripotent Stem Cells from Mouse  
1563 Embryonic and Adult Fibroblast Cultures by Defined Factors. *Cell* *126*, 663–676.
- 1564 Takahashi, K., and Yamanaka, S. (2016). A decade of transcription factor-mediated  
1565 reprogramming to pluripotency. *Nat. Rev. Mol. Cell Biol.* *17*, 183–193.
- 1566 Tesar, P.J., Chenoweth, J.G., Brook, F.A., Davies, T.J., Evans, E.P., Mack, D.L., Gardner, R.L.,  
1567 and McKay, R.D.G. (2007). New cell lines from mouse epiblast share defining features with  
1568 human embryonic stem cells. *448*, 196–199.
- 1569 Toiber, D., Erdel, F., Bouazoune, K., Silberman, D.M., Zhong, L., Mulligan, P., Sebastian, C.,  
1570 Cosentino, C., Martinez-Pastor, B., Giacosa, S., et al. (2013). SIRT6 recruits SNF2H to DNA  
1571 break sites, preventing genomic instability through chromatin remodeling. *Mol. Cell* *51*, 454–468.
- 1572 Vidal, S.E., Amlani, B., Chen, T., Tsirigos, A., and Stadtfeld, M. (2014). Combinatorial  
1573 modulation of signaling pathways reveals cell-type-specific requirements for highly efficient and  
1574 synchronous iPSC reprogramming. *Stem Cell Reports* *3*, 574–584.
- 1575 Vierbuchen, T., Ostermeier, A., Pang, Z.P., Kokubu, Y., Südhof, T.C., and Wernig, M. (2010).  
1576 Direct conversion of fibroblasts to functional neurons by defined factors. *463*, 1035–1041.
- 1577 Wang, Y., Zhang, H., Chen, Y., Sun, Y., Yang, F., Yu, W., Liang, J., Sun, L., Yang, X., Shi, L.,  
1578 et al. (2009). LSD1 Is a Subunit of the NuRD Complex and Targets the Metastasis Programs in  
1579 Breast Cancer. *Cell* *138*, 660–672.
- 1580 Wernig, M., Meissner, A., Foreman, R., Brambrink, T., Ku, M., Hochedlinger, K., Bernstein,  
1581 B.E., and Jaenisch, R. (2007). In vitro reprogramming of fibroblasts into a pluripotent ES-cell-  
1582 like state. *Nature* *448*, 318–324.
- 1583 Wernig, M., Lengner, C.J., Hanna, J., Lodato, M.A., Steine, E., Foreman, R., Staerk, J.,  
1584 Markoulaki, S., and Jaenisch, R. (2008). A drug-inducible transgenic system for direct

- 1585 reprogramming of multiple somatic cell types. *Nat. Biotechnol.* *26*, 916–924.
- 1586 Xie, W., Ling, T., Zhou, Y., Feng, W., Zhu, Q., Stunnenberg, H.G., Grummt, I., and Tao, W.  
1587 (2012). The chromatin remodeling complex NuRD establishes the poised state of rRNA genes  
1588 characterized by bivalent histone modifications and altered nucleosome positions. *Proc. Natl.*  
1589 *Acad. Sci.* *109*, 8161–8166.
- 1590 Yildirim, O., Li, R., Hung, J.H., Chen, P.B., Dong, X., Ee, L.S., Weng, Z., Rando, O.J., and  
1591 Fazio, T.G. (2011). Mbd3/NURD complex regulates expression of 5-hydroxymethylcytosine  
1592 marked genes in embryonic stem cells. *Cell* *147*, 1498–1510.
- 1593 Ying, Q.-L., Nichols, J., Chambers, I., and Smith, A. (2003). BMP Induction of Id Proteins  
1594 Suppresses Differentiation and Sustains Embryonic Stem Cell Self-Renewal in Collaboration  
1595 with STAT3. *Cell* *115*, 281–292.
- 1596 Ying, Q.-L., Wray, J., Nichols, J., Batlle-Morera, L., Doble, B., Woodgett, J., Cohen, P., and  
1597 Smith, A. (2008). The ground state of embryonic stem cell self-renewal. *453*, 519–523.
- 1598 Yoshimizu, T., Sugiyama, N., De Felice, M., Yeom, Y., Ohbo, K., Masuko, K., Obinata, M.,  
1599 Kuniya, A., Schöler, H.R., and Matsui, Y. (1999). Germline-specific expression of the Oct-  
1600 4/green fluorescent protein (GFP) transgene in mice. *Dev. Growth Differ.* *41*, 675–684.
- 1601 Zhang, W., Aubert, A., Gomez de Segura, J.M., Karuppasamy, M., Basu, S., Murthy, A.S.,  
1602 Diamante, A., Drury, T.A., Balmer, J., Cramard, J., et al. (2016). The Nucleosome Remodeling  
1603 and Deacetylase Complex NuRD Is Built from Preformed Catalytically Active Sub-modules. *J.*  
1604 *Mol. Biol.* *428*, 2931–2942.
- 1605 Zhao, Q., Xie, Y., Zheng, Y., Jiang, S., Liu, W., Mu, W., Liu, Z., Zhao, Y., Xue, Y., and Ren, J.  
1606 (2014). GPS-SUMO: A tool for the prediction of sumoylation sites and SUMO-interaction  
1607 motifs. *Nucleic Acids Res.* *42*.
- 1608 Zhuang, Q., Li, W., Benda, C., Huang, Z., Liu, P., Guo, X., Luo, Z., Yang, Z., Yang, J., Huang,  
1609 Y., et al. (2018). NCoR / SMRT co-repressors cooperate with c-MYC to create an epigenetic  
1610 barrier to somatic cell reprogramming. *Nat. Cell Biol. Biol. In Press*.
- 1611 Zviran, A., and Hanna, J.H. (2014). Lucky iPSCs. *Genome Biol.* *15*.
- 1612 Zviran, A., Mor, N., Rais, Y., Gingold, H., Peles, S., Chomsky, E., Viukov, S., Buenrostro, J.D.,  
1613 Weinberger, L., Manor, Y.S., et al. (2017). High-Resolution Dissection of Conductive  
1614 Reprogramming Trajectory to Ground State Pluripotency. *bioRxiv* 184135.
- 1615

# Figure 1

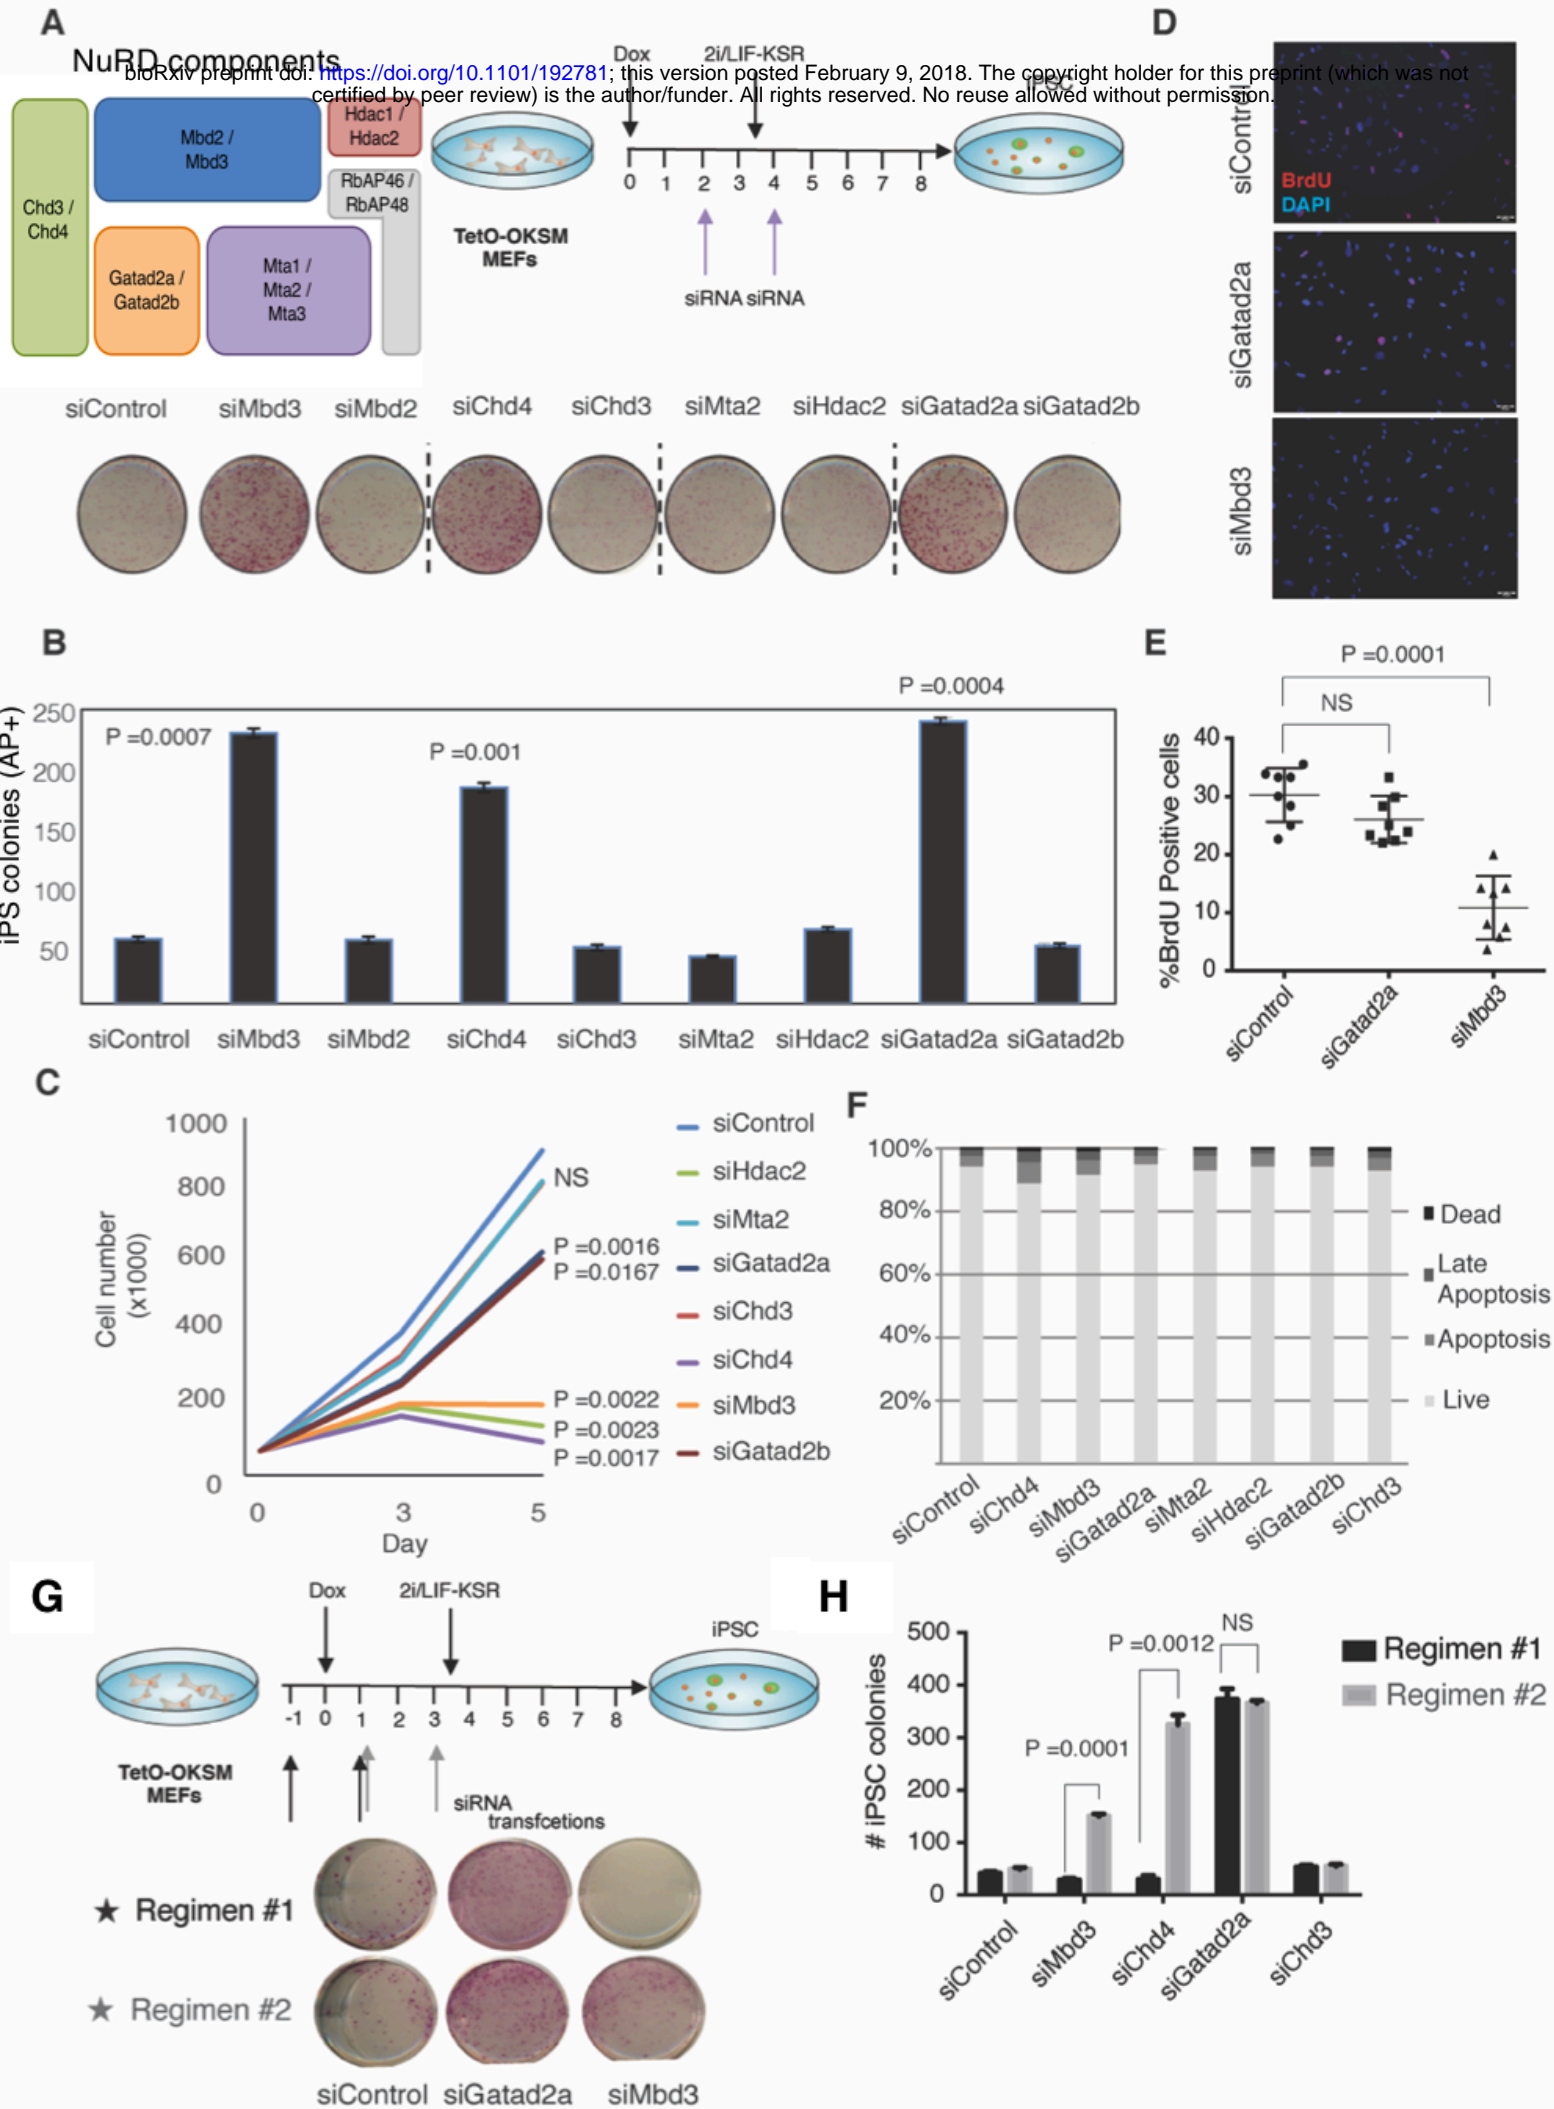

# Figure 2

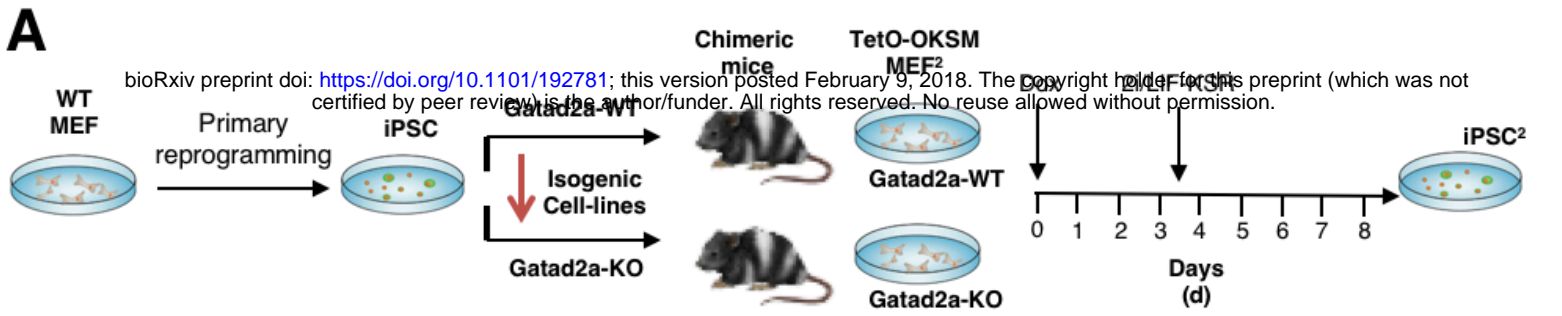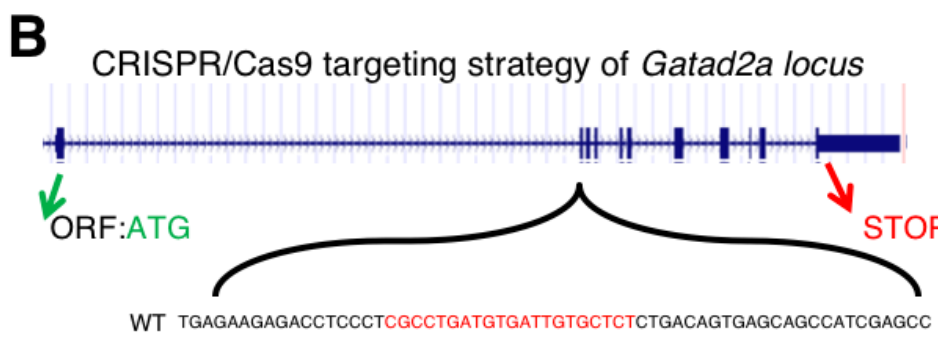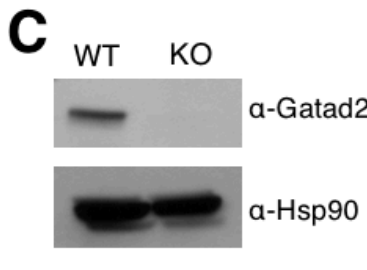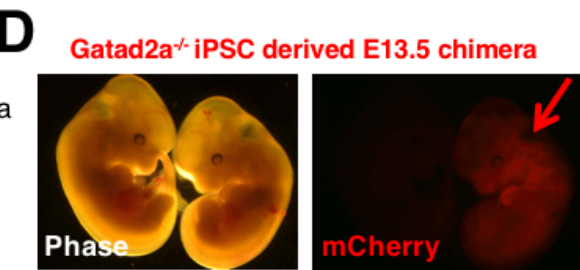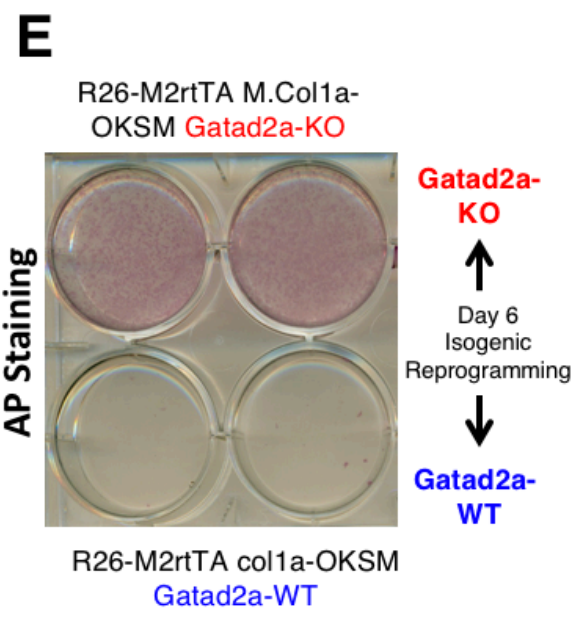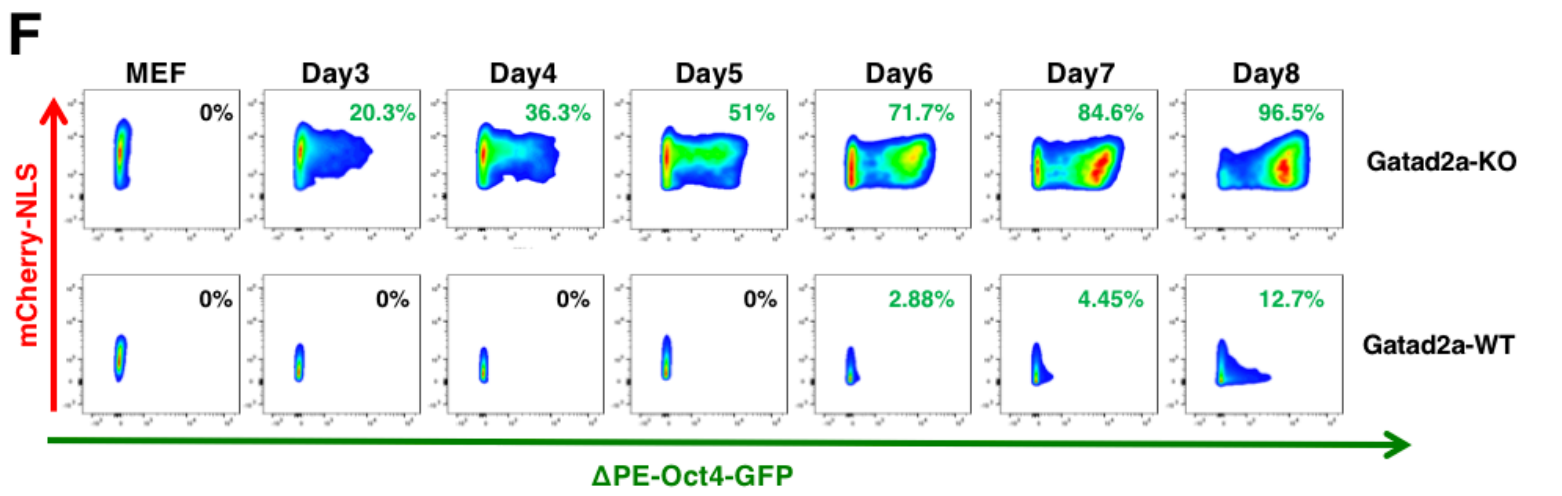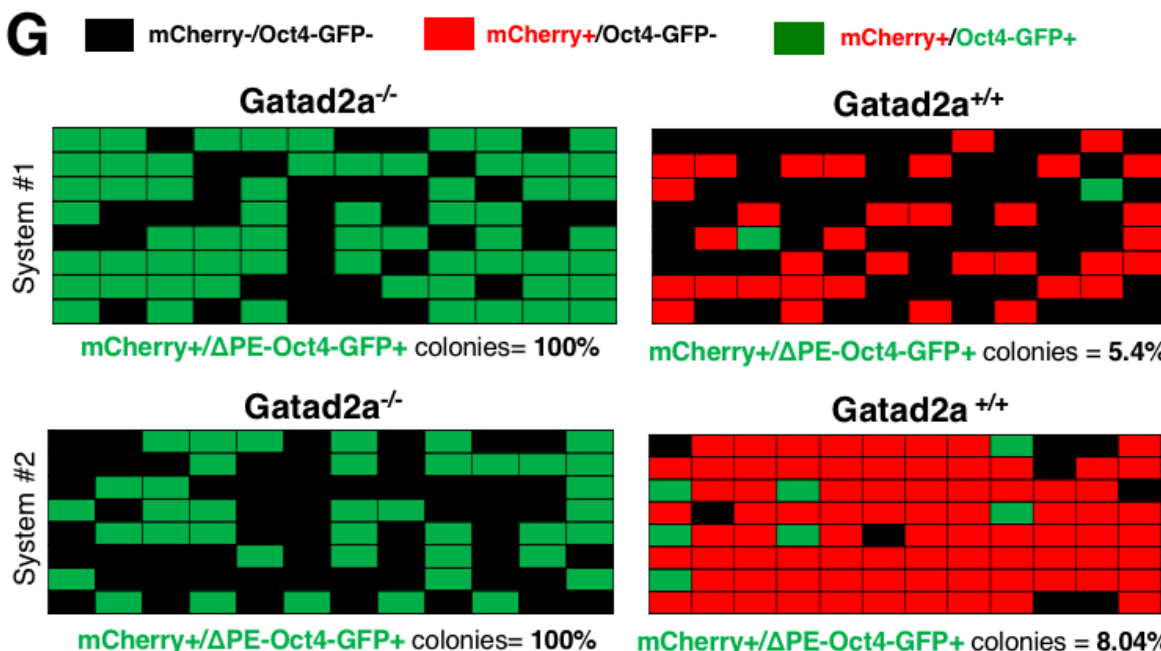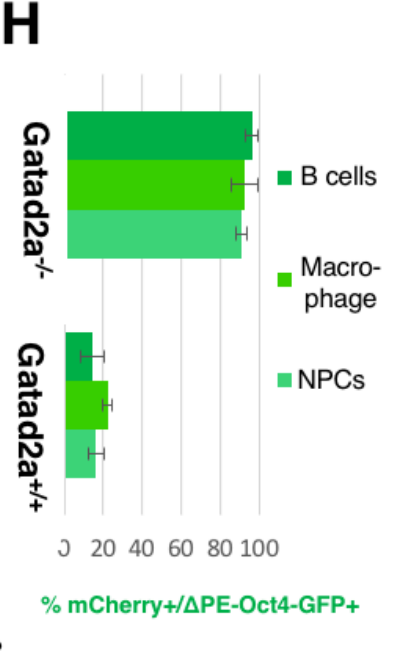

**Figure 3**

**A** Gatad2a-KO system:

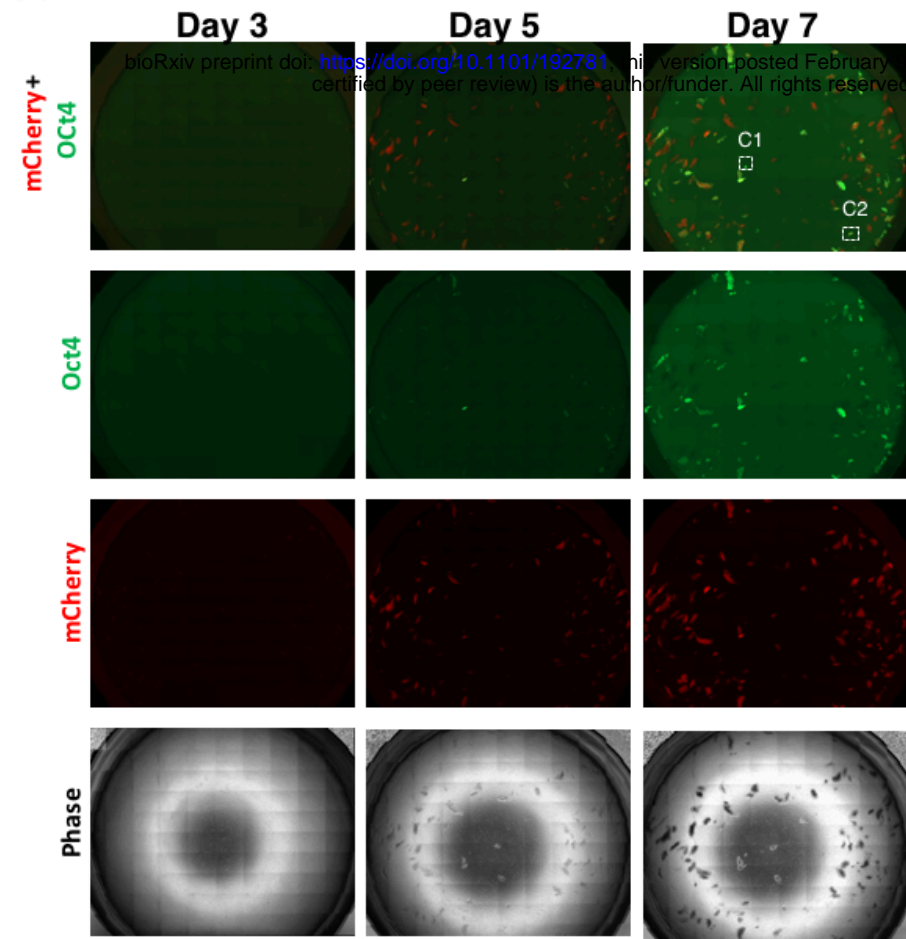

**B**

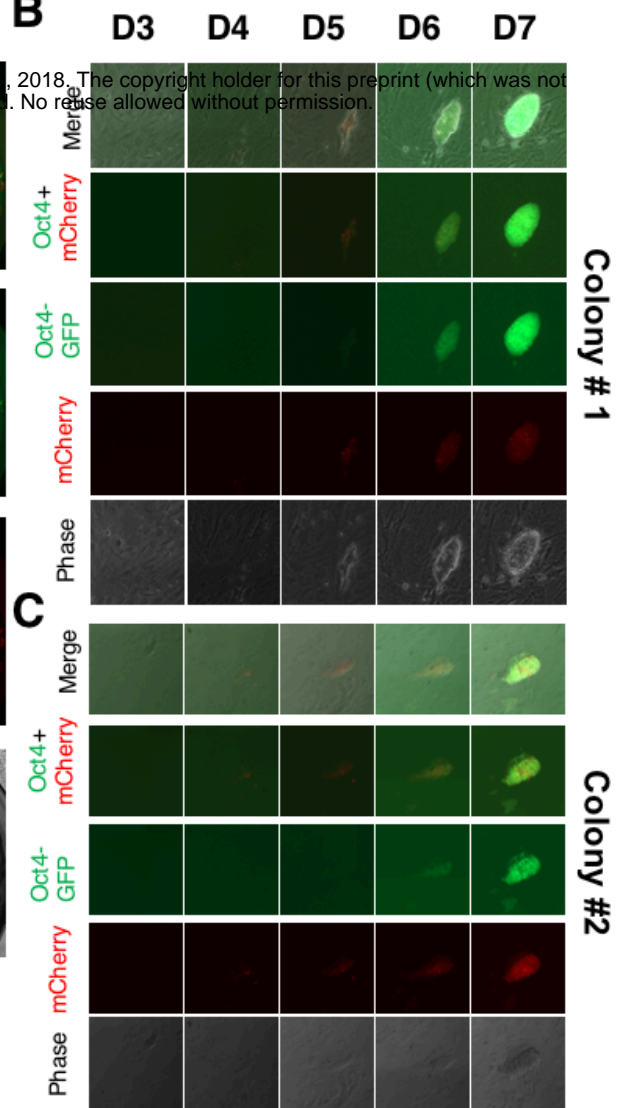

**D** Gatad2a-WT isogenic system:

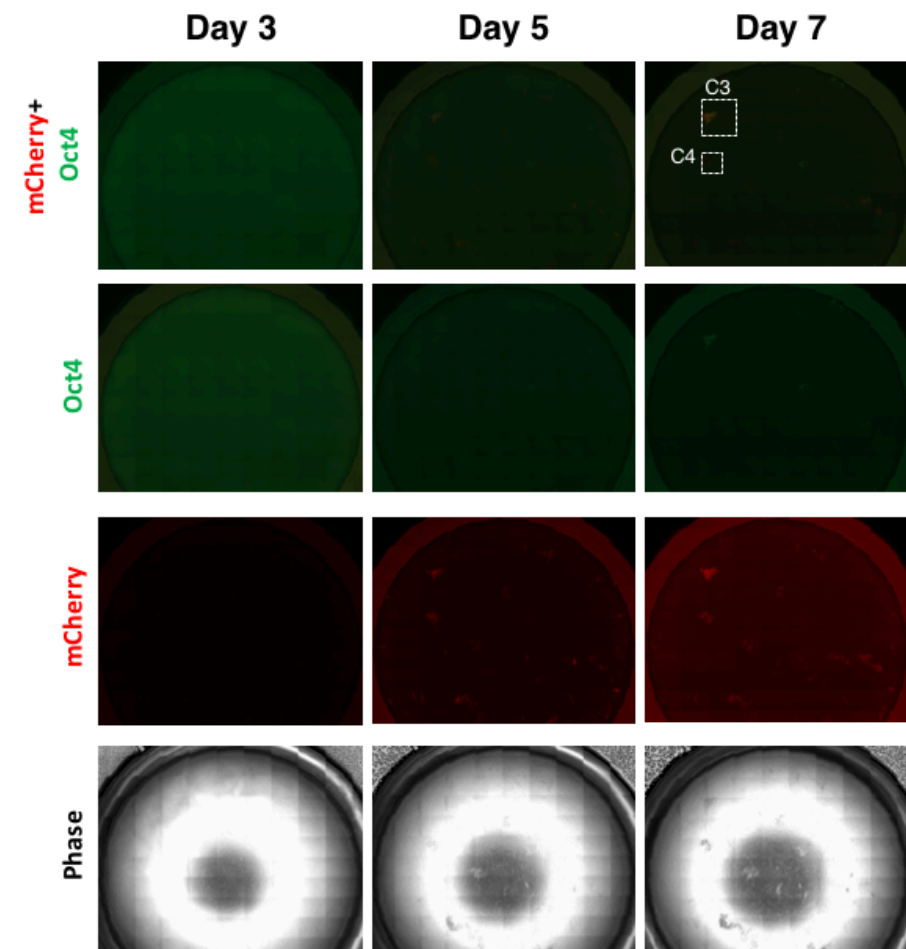

**E**

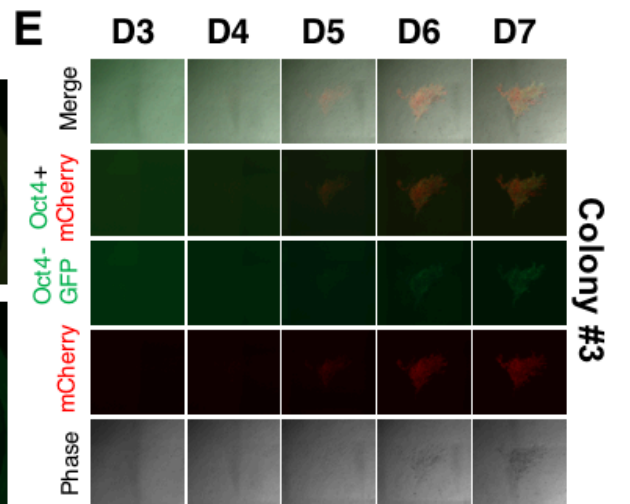

**F**

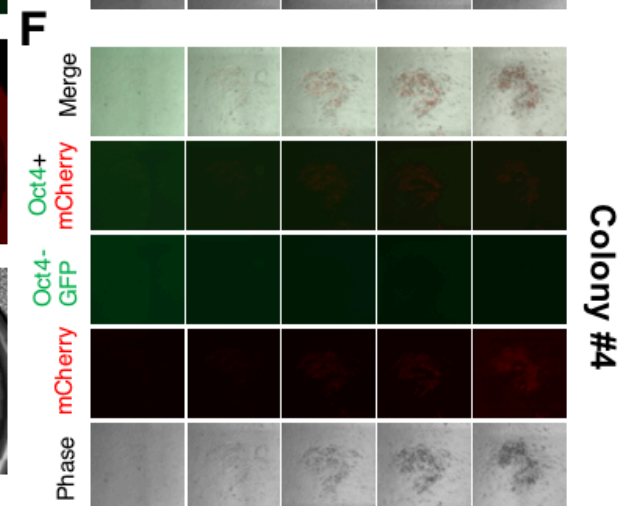

bioRxiv preprint doi: <https://doi.org/10.1101/192781>; this version posted February 14, 2018. The copyright holder for this preprint (which was not certified by peer review) is the author/funder. All rights reserved. No reuse allowed without permission.



**Figure 4**

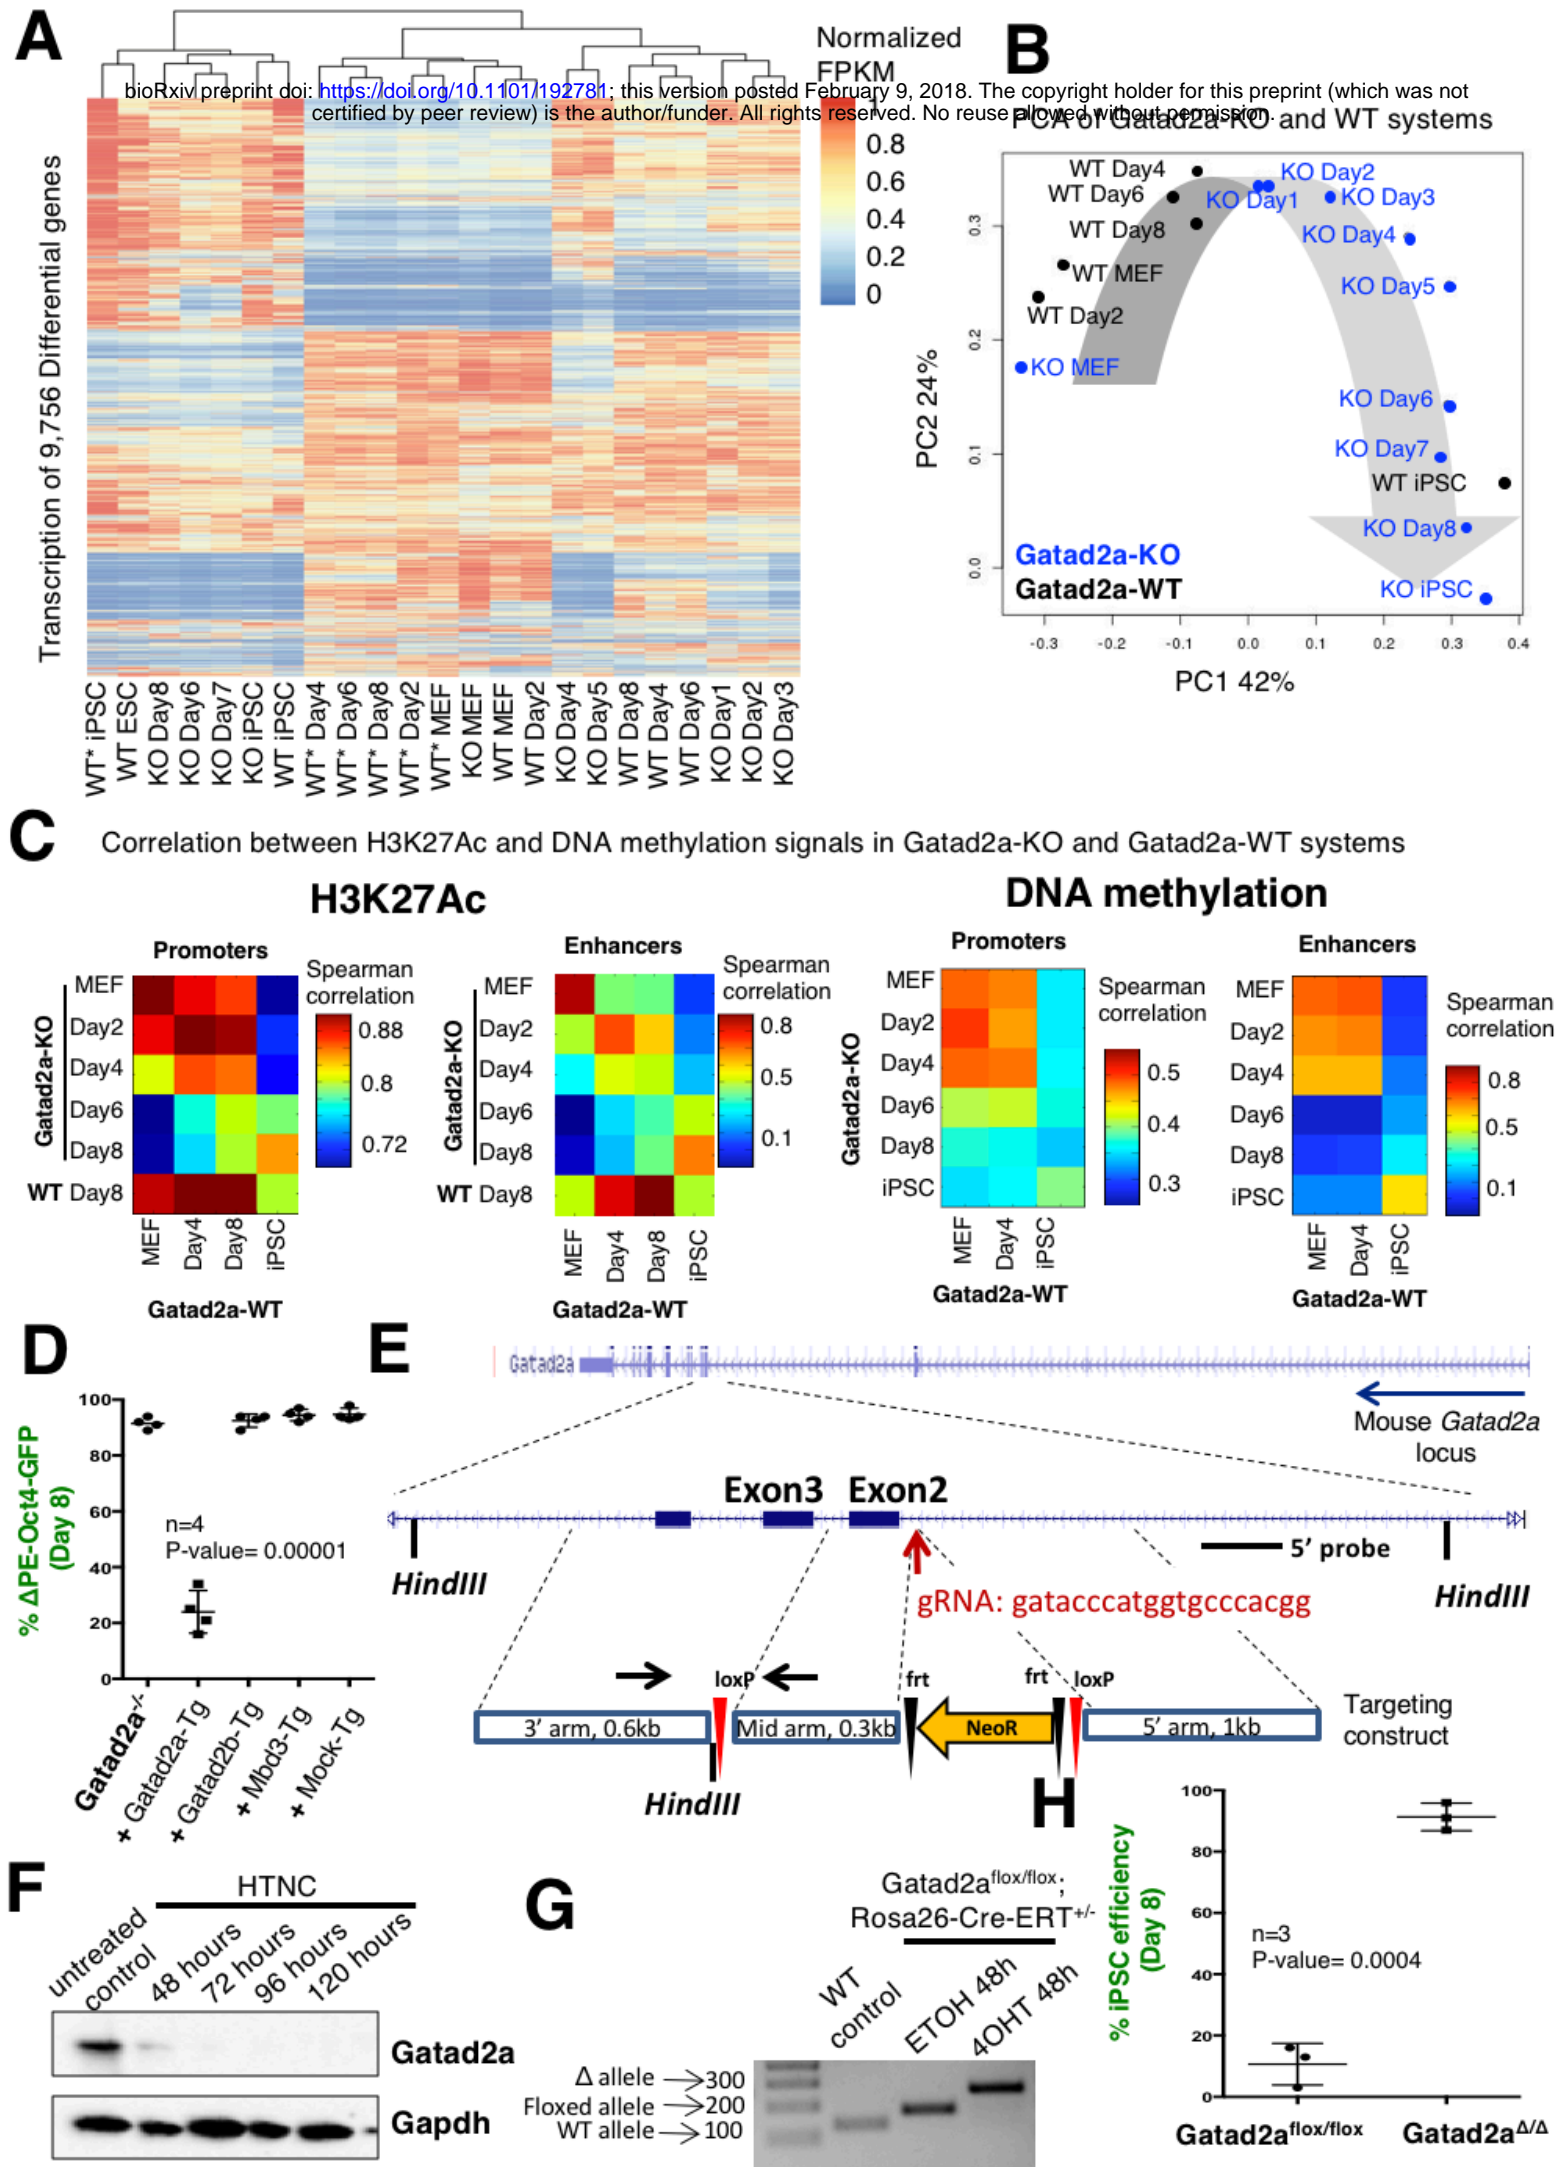

# Figure 5

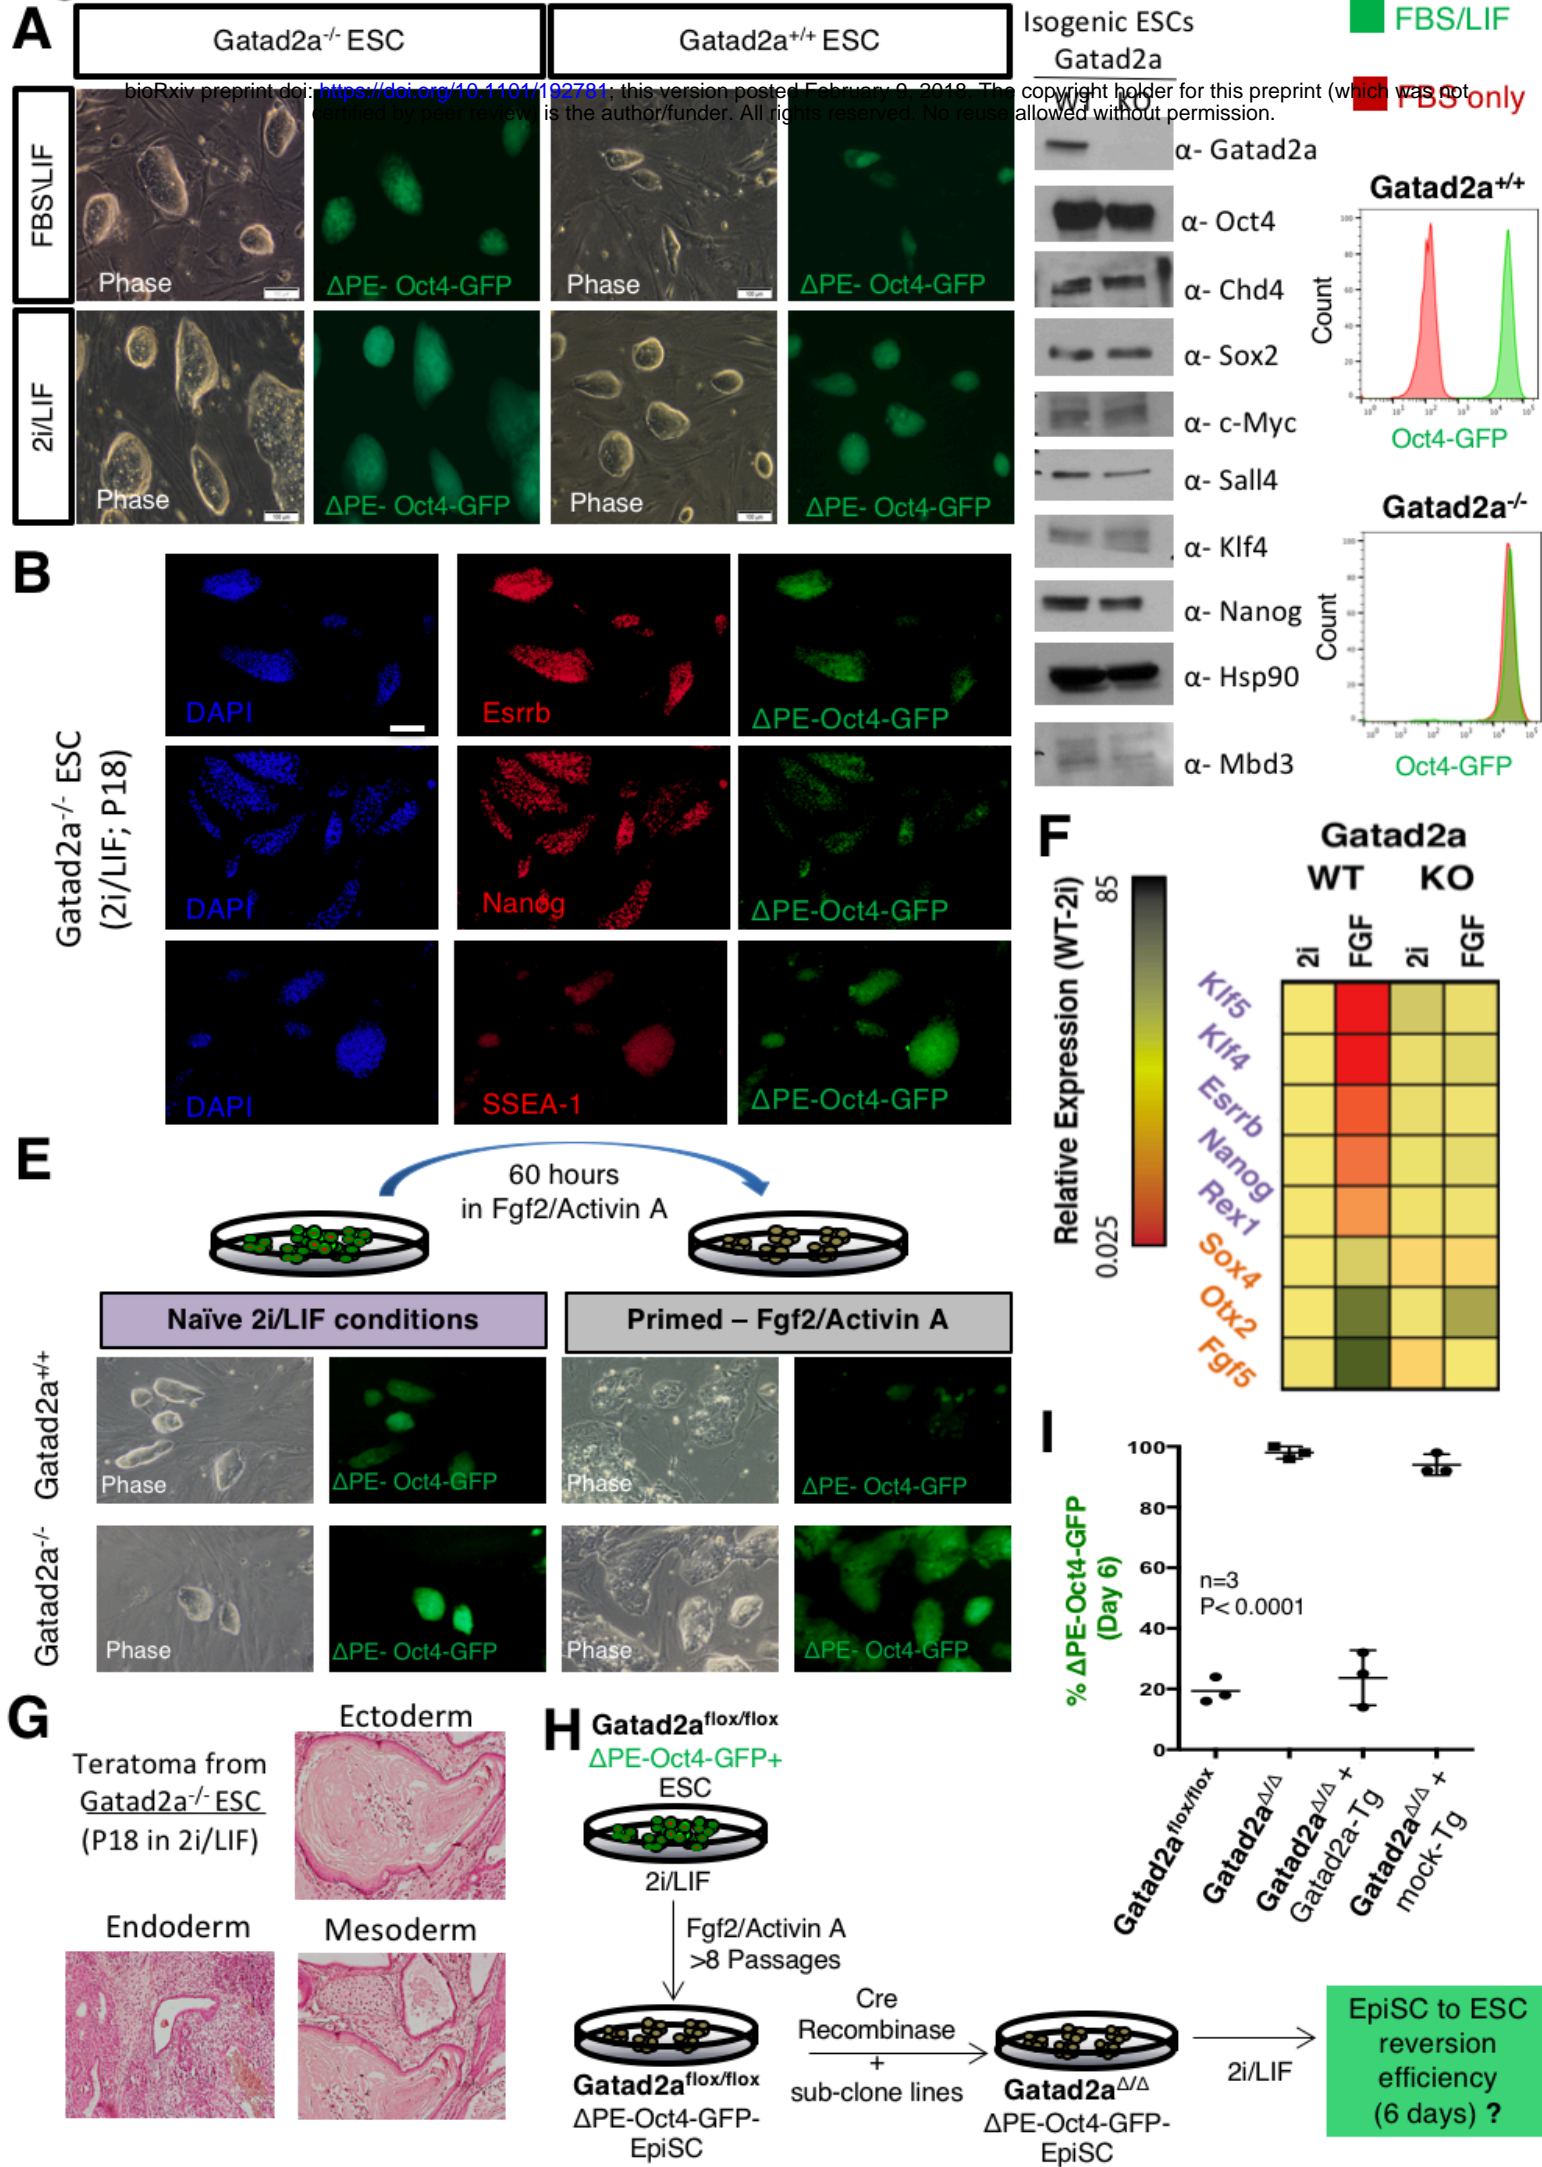

# Figure 6

## A

### MS – Mbd3 Pull-down

(in MEFs + OSKM)

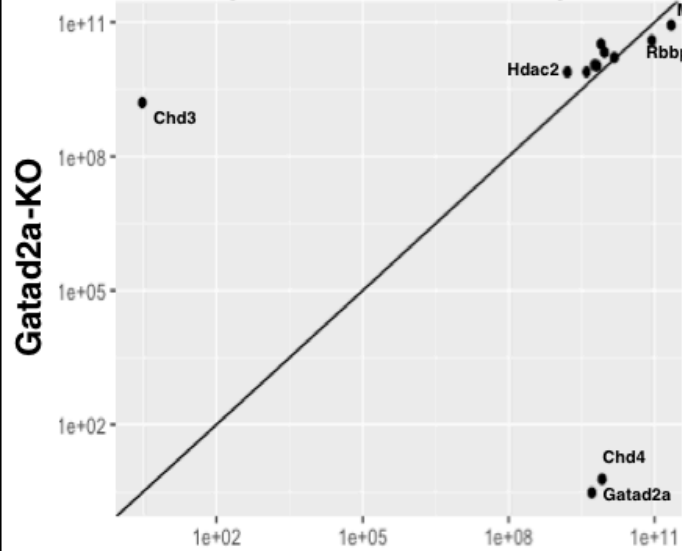

## B

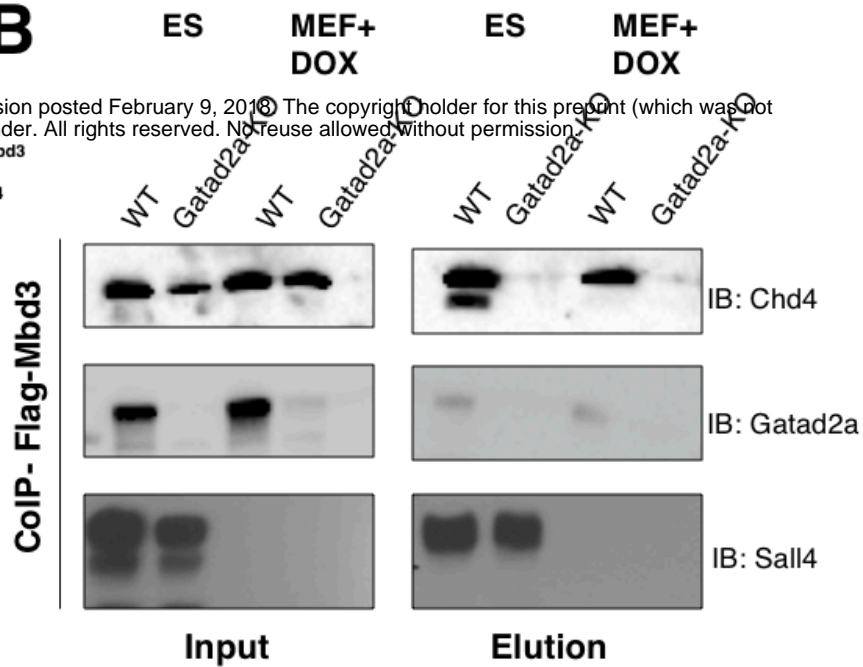

## C

### Gatad2a-WT

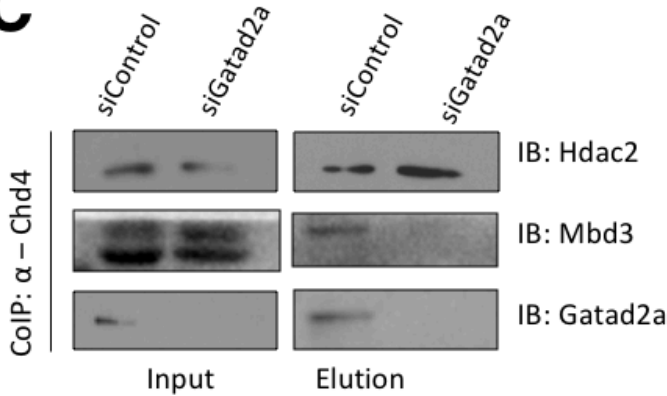

## D

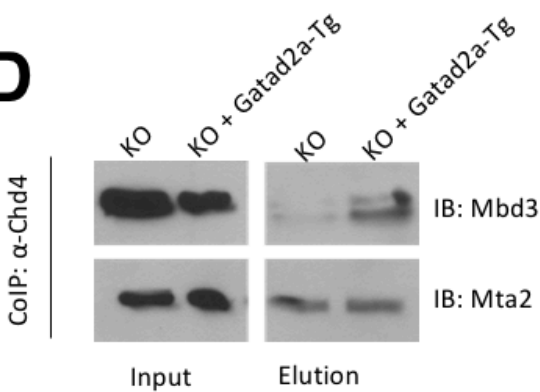

## E

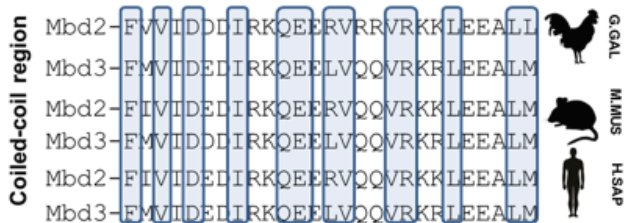

## H

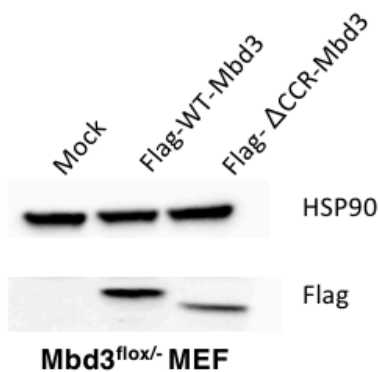

## I

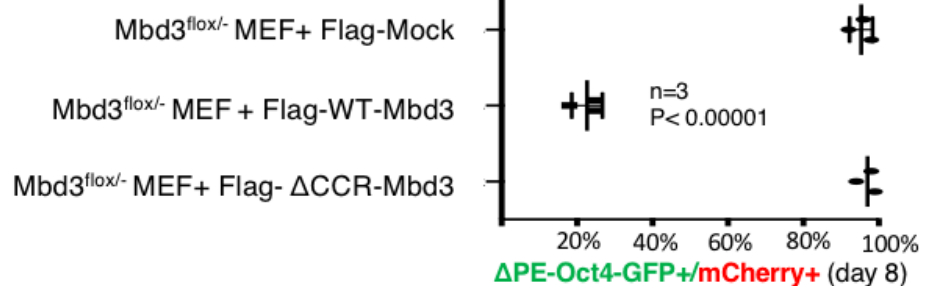

## F

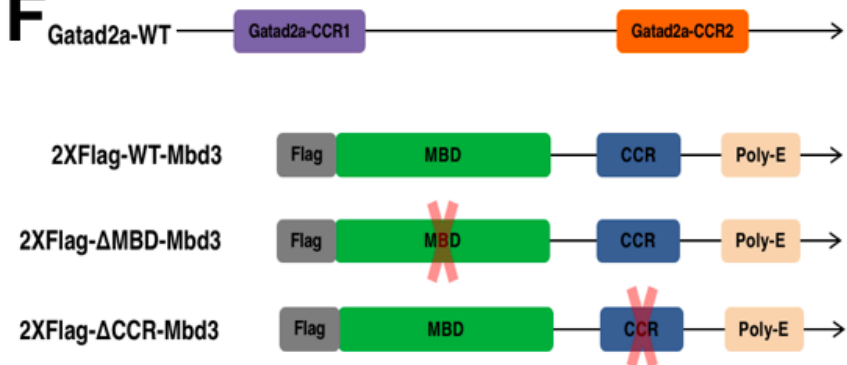

## G

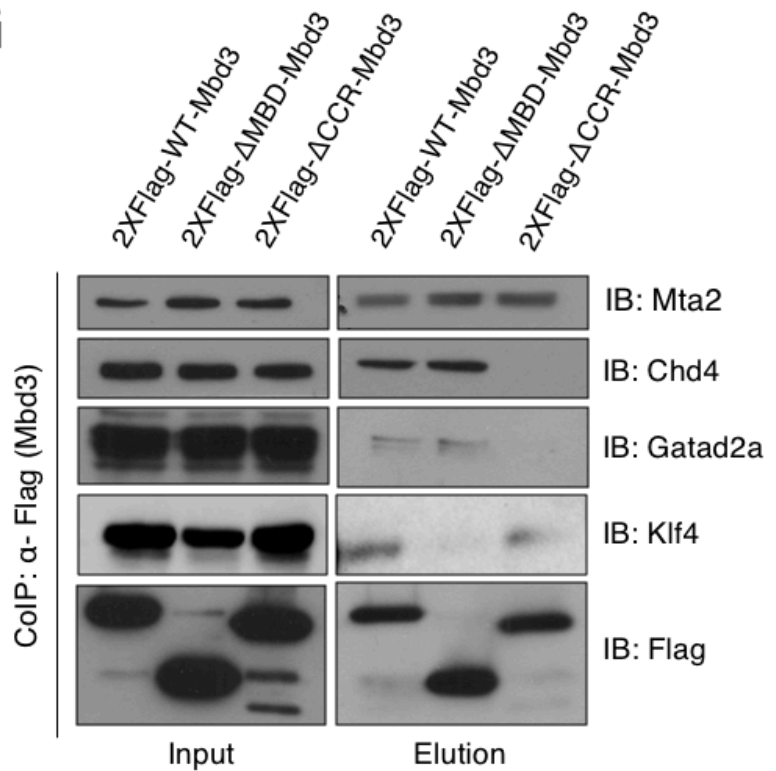

# Figure 7

## A

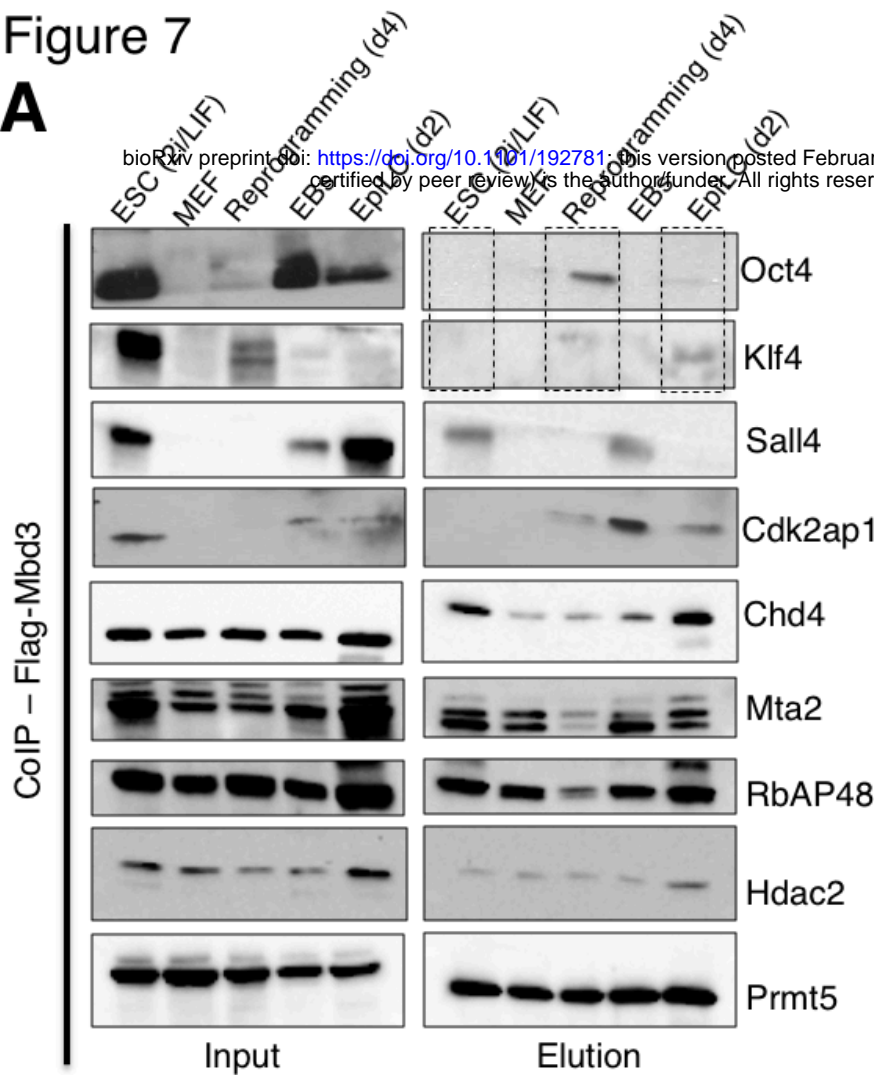

## B

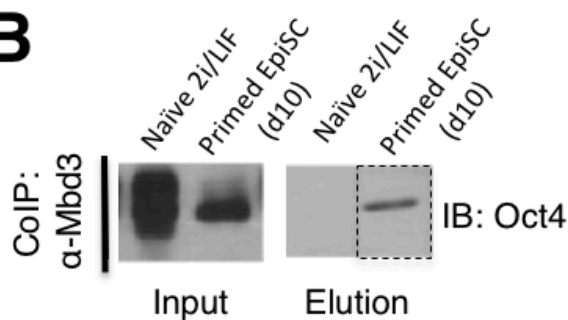

## F

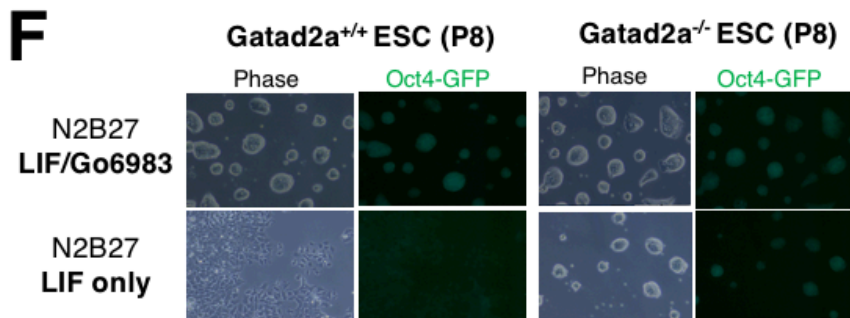

## G

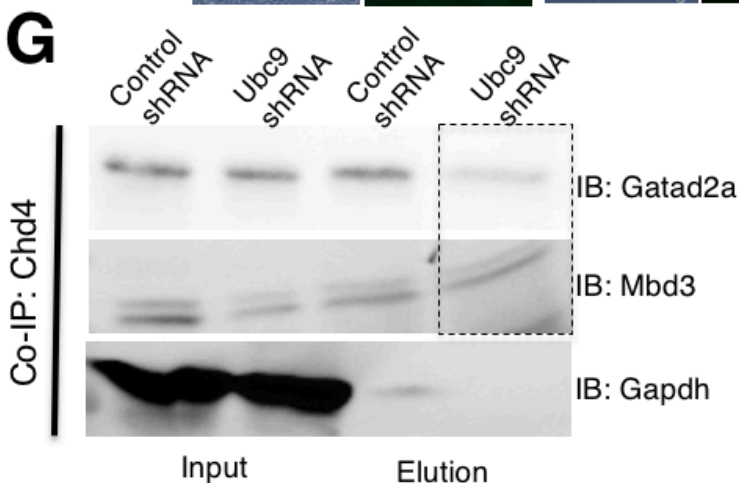

## C

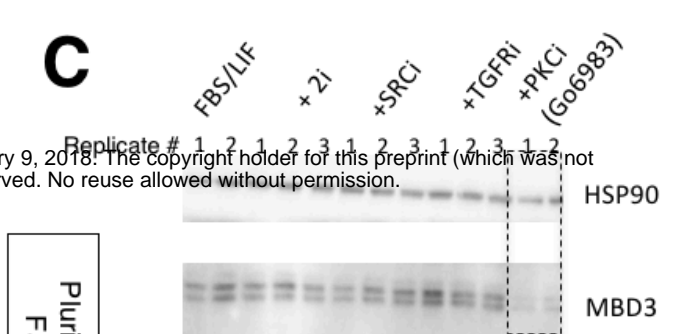

## D

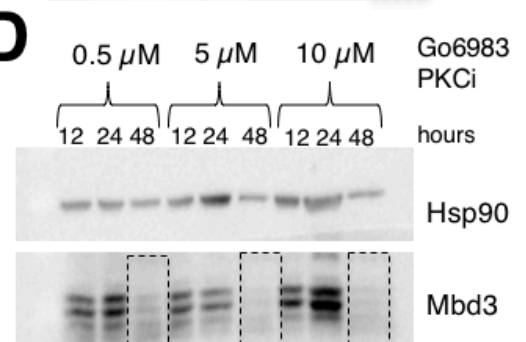

## E

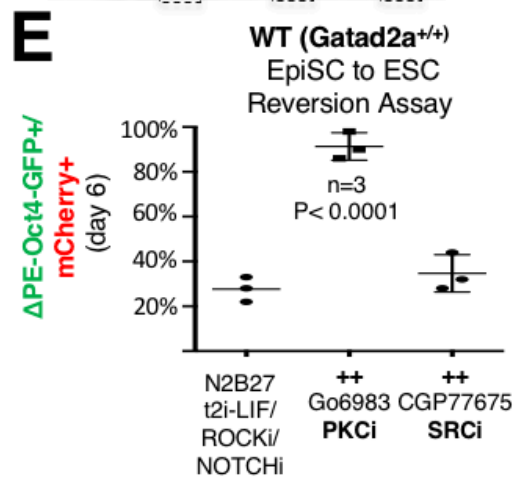

## H

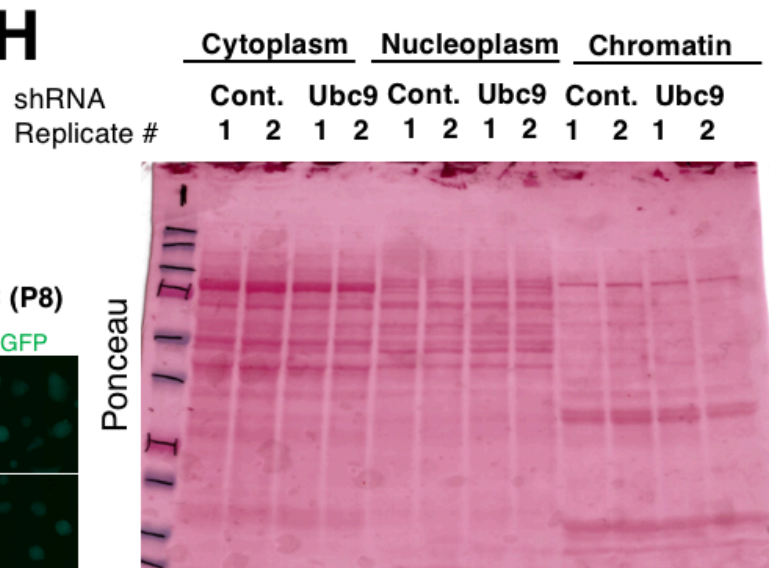

Gatad2a 75-  
Mbd3 37-  
Mta2 75-  
Dnmt1 250-150-  
Ubc9 15-  
GAPDH 37-  
H2b 15-

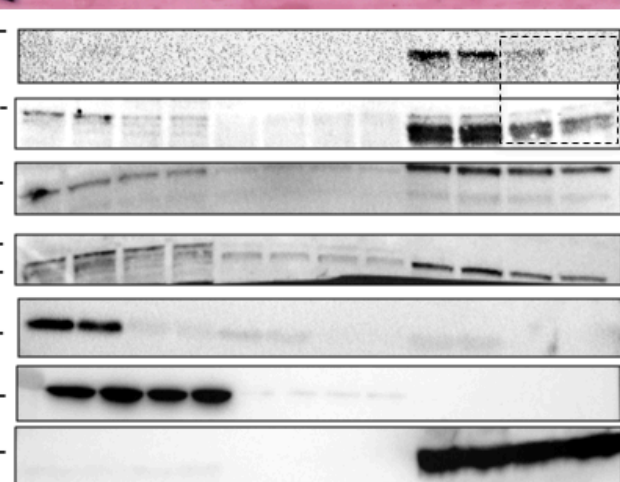

# Supplementary Figure S1

**A**

bioRxiv preprint doi: <https://doi.org/10.1101/192781>; this version posted February 9, 2018. The copyright holder for this preprint (which was not certified by peer review) is the author/funder. All rights reserved. No reuse allowed without permission.

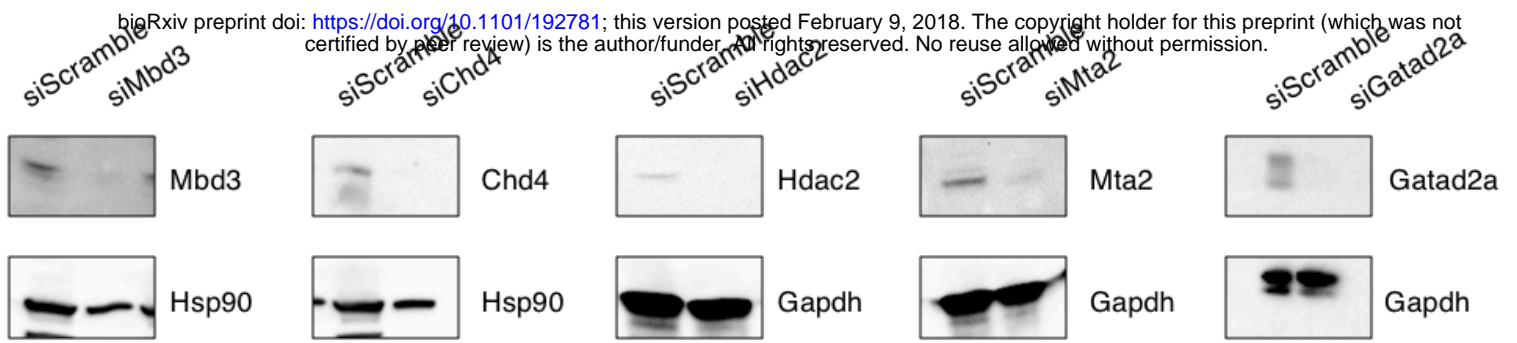

**B**

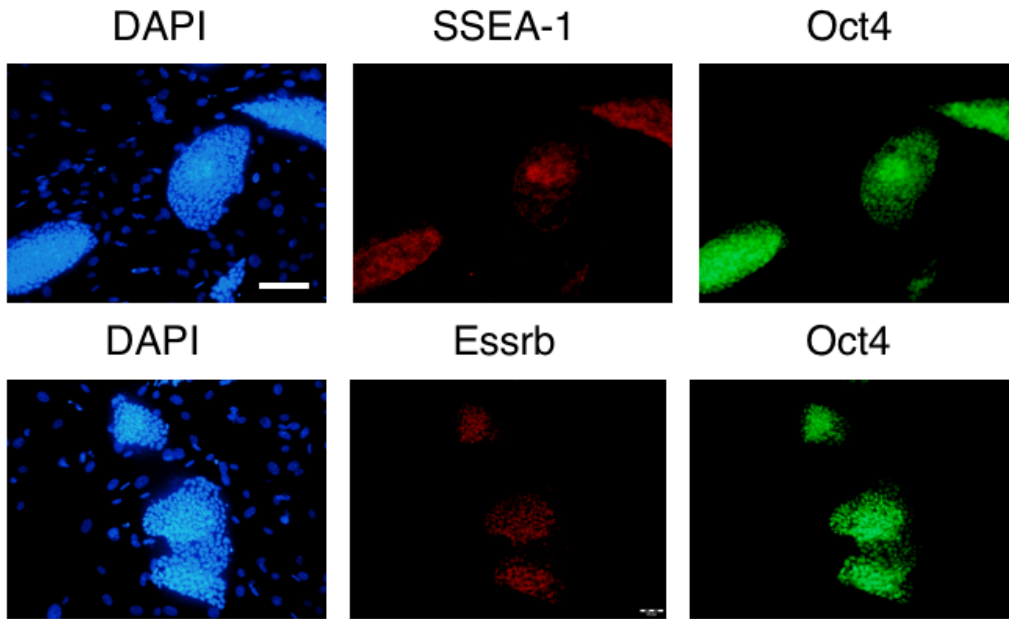

**C**

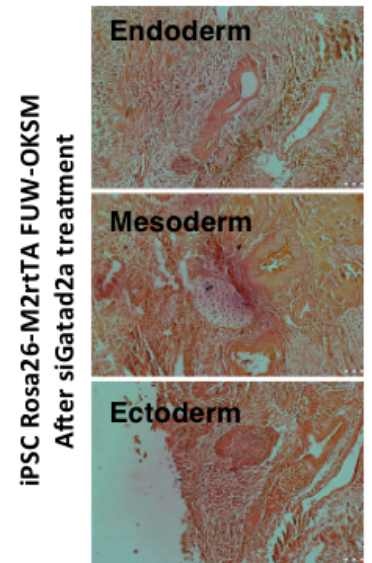

**D**

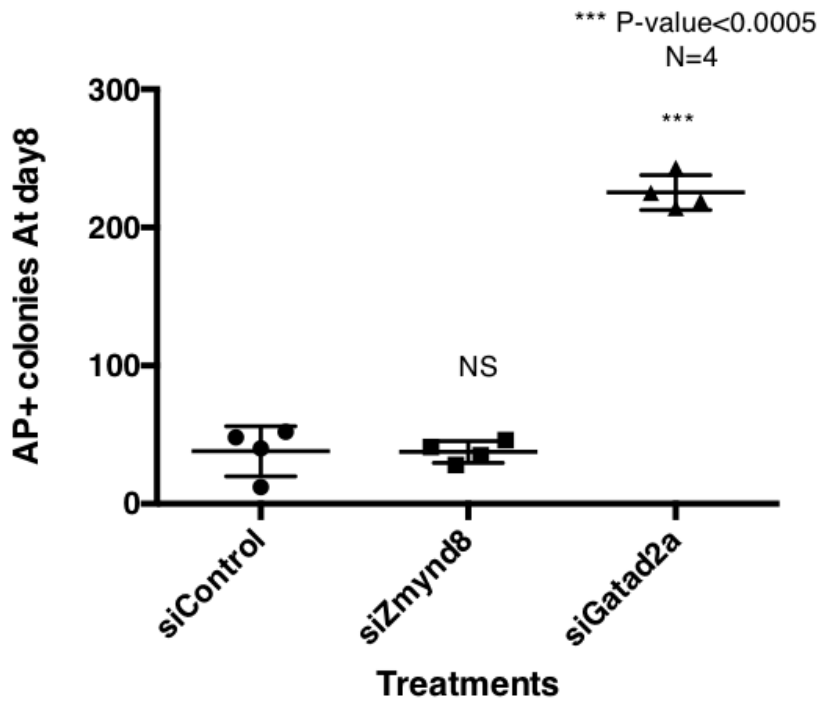

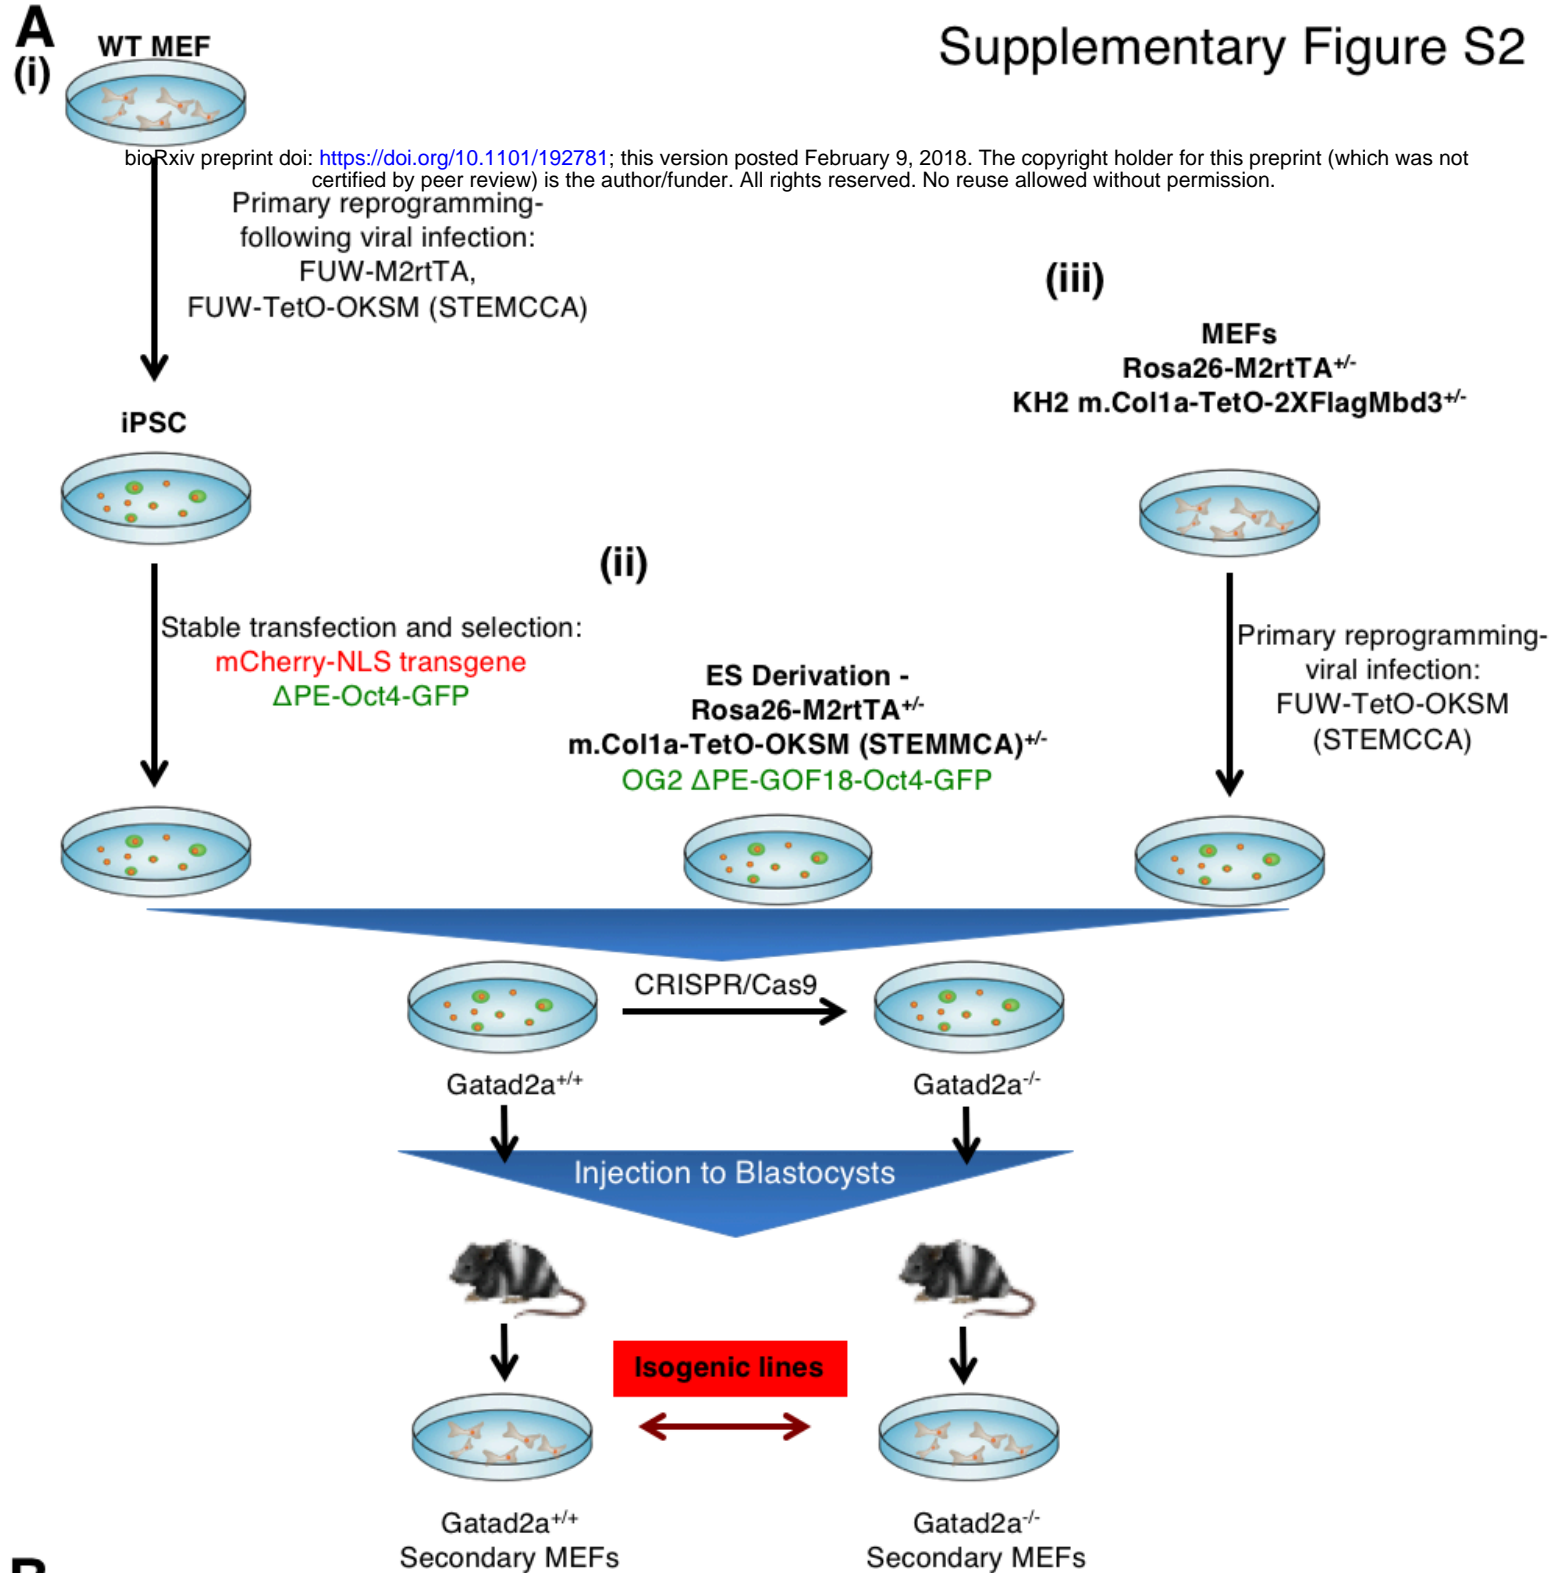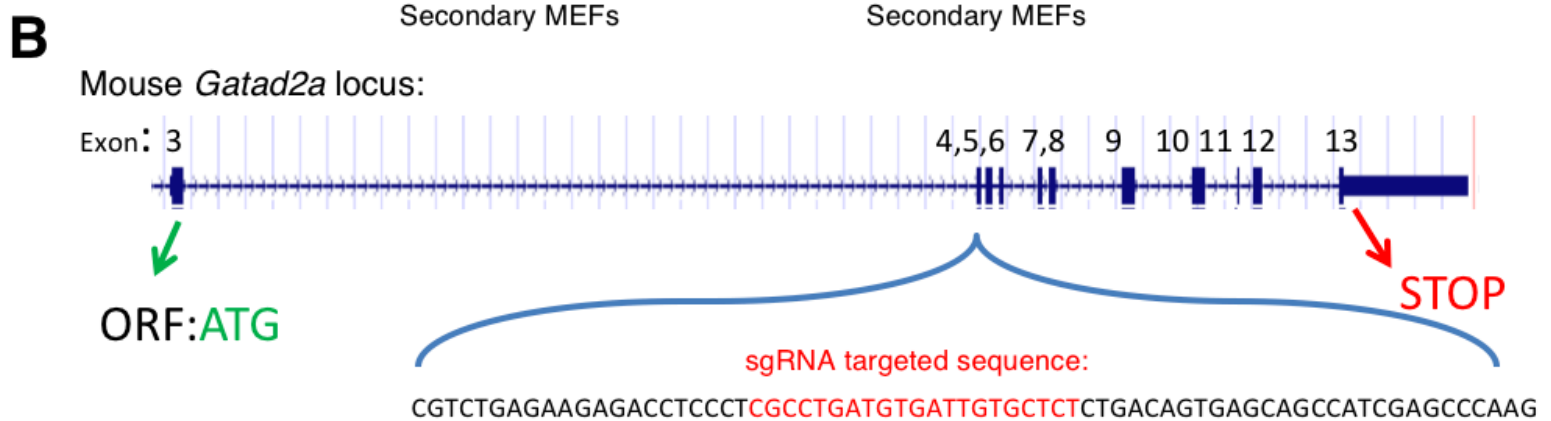

**C** Targeting Statistics: total n=88

|                   |          |
|-------------------|----------|
| WT                | 39 (44%) |
| KO                | 39 (44%) |
| Other (incl. Het) | 10 (12%) |

**D**

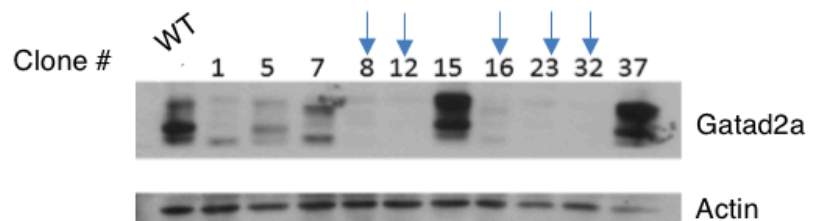

E

(i) bioRxiv preprint doi: <https://doi.org/10.1101/192781>; this version posted February 9, 2018. The copyright holder for this preprint (which was not certified by peer review) is the author/funder. All rights reserved. No reuse allowed without permission.

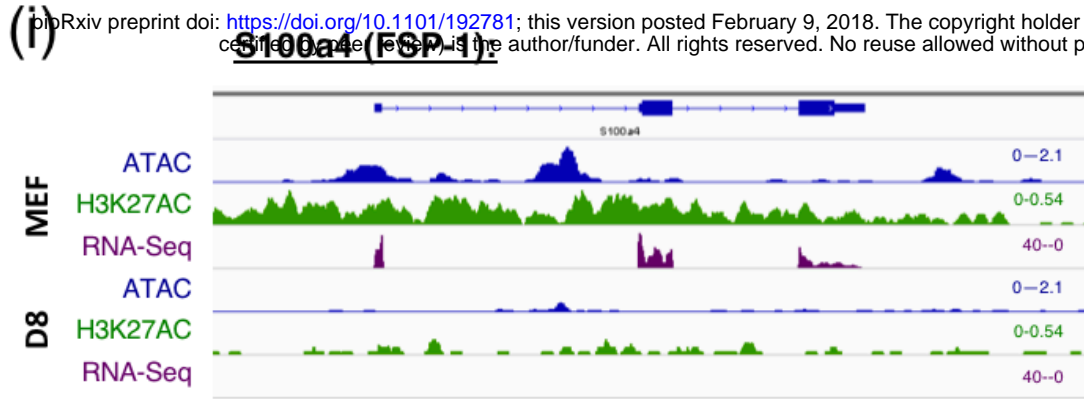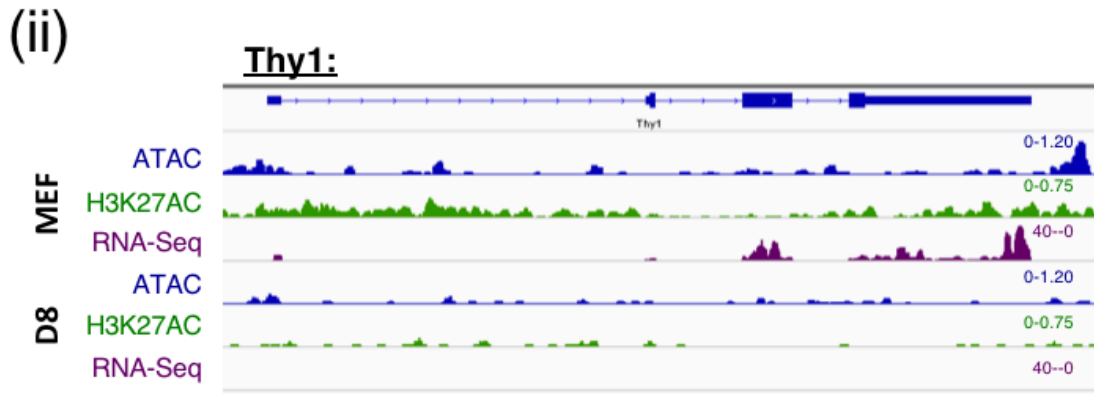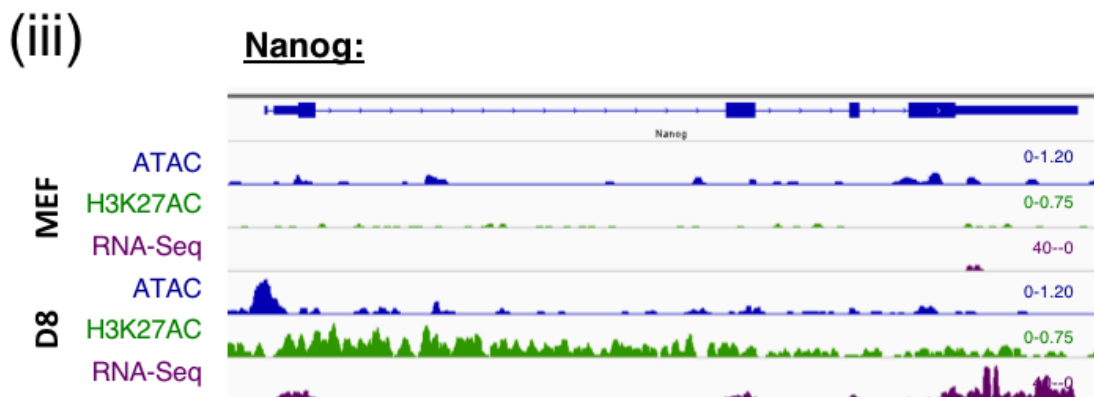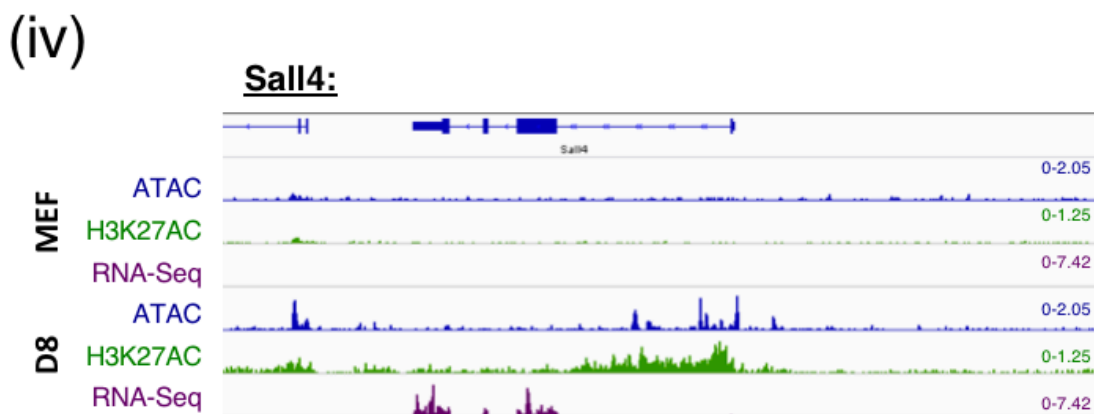

# Supplementary Figure S3

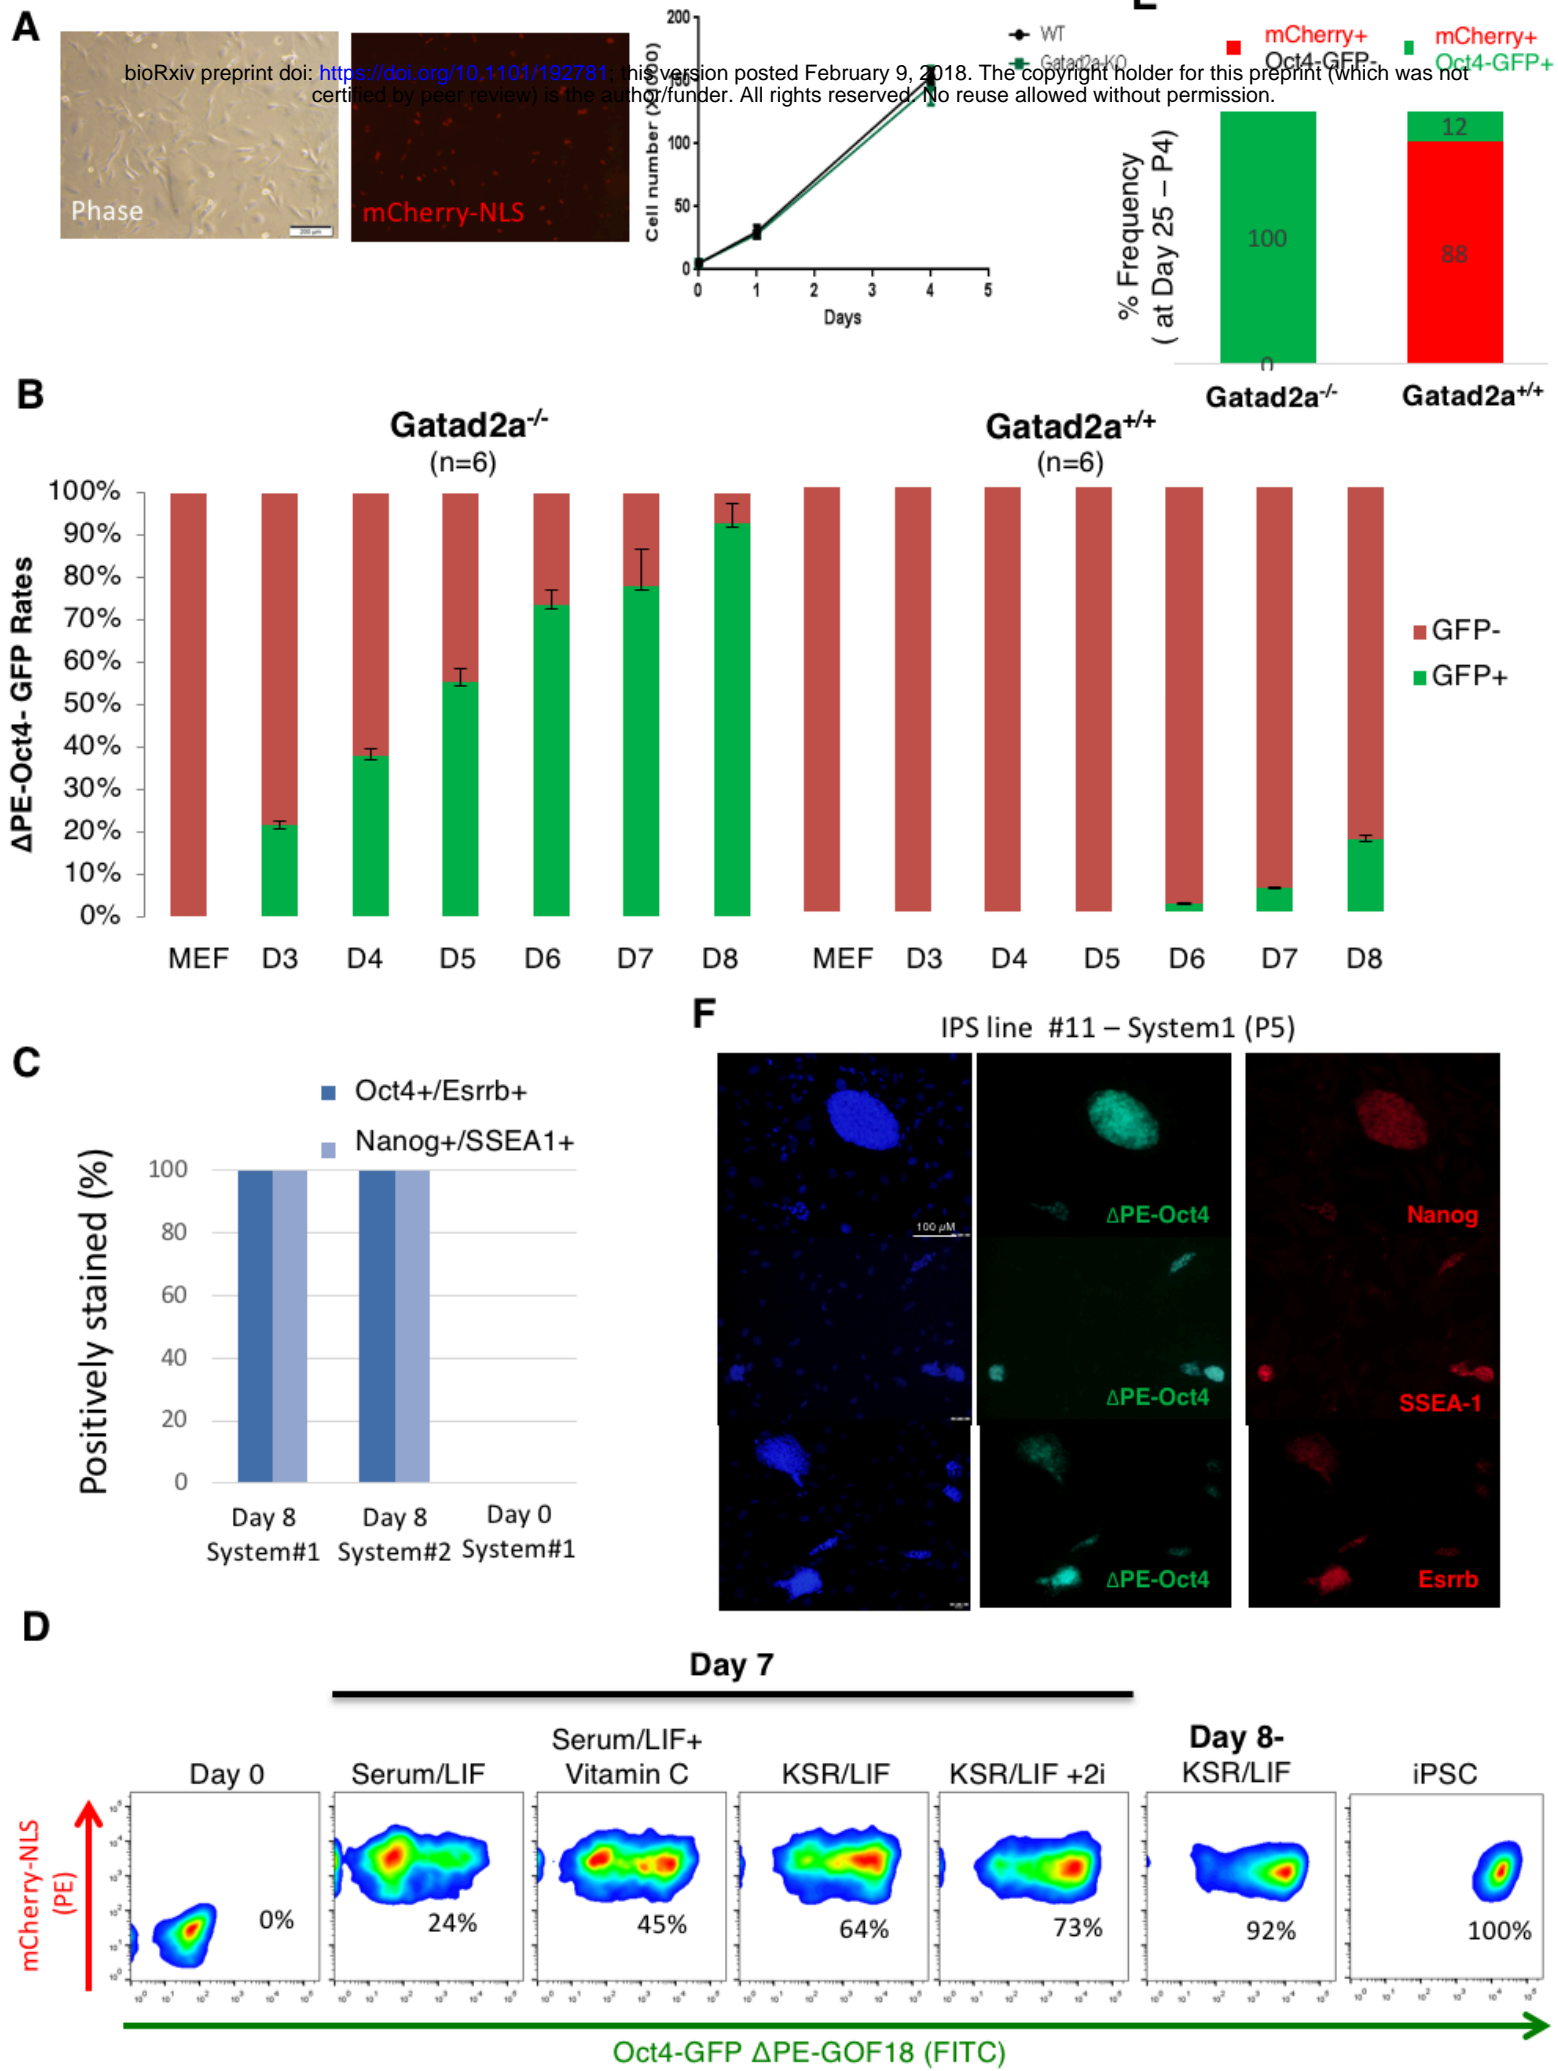



# Supplementary Figure S4

**A**

bioRxiv preprint doi: <https://doi.org/10.1101/192781>; this version posted February 9, 2018. The copyright holder for this preprint (which was not certified by peer review) is the author/funder. All rights reserved. No reuse allowed without permission.

**Gatad2a-KO**

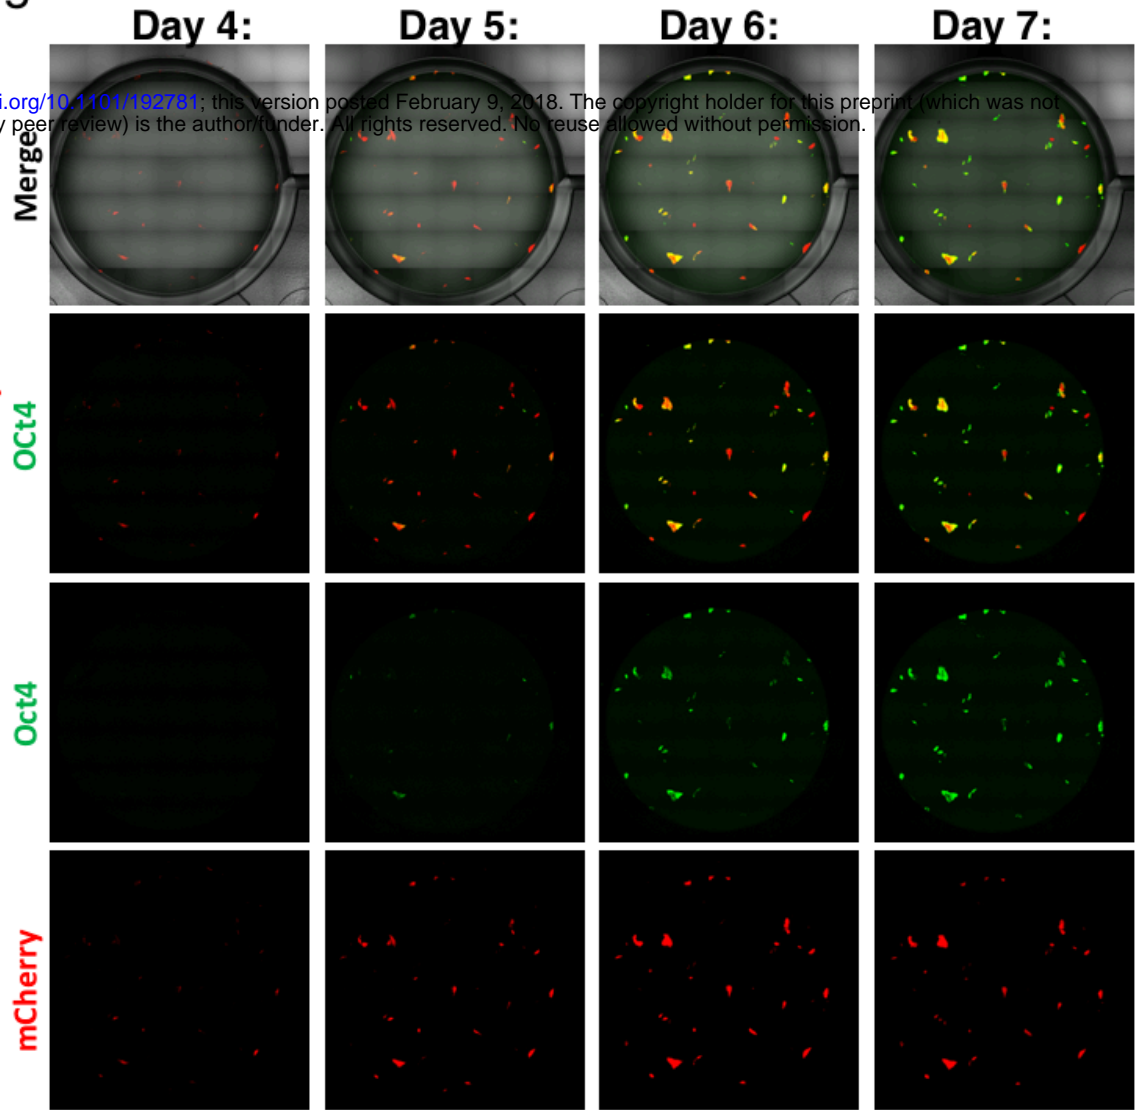

**B**

**Gatad2a-WT**

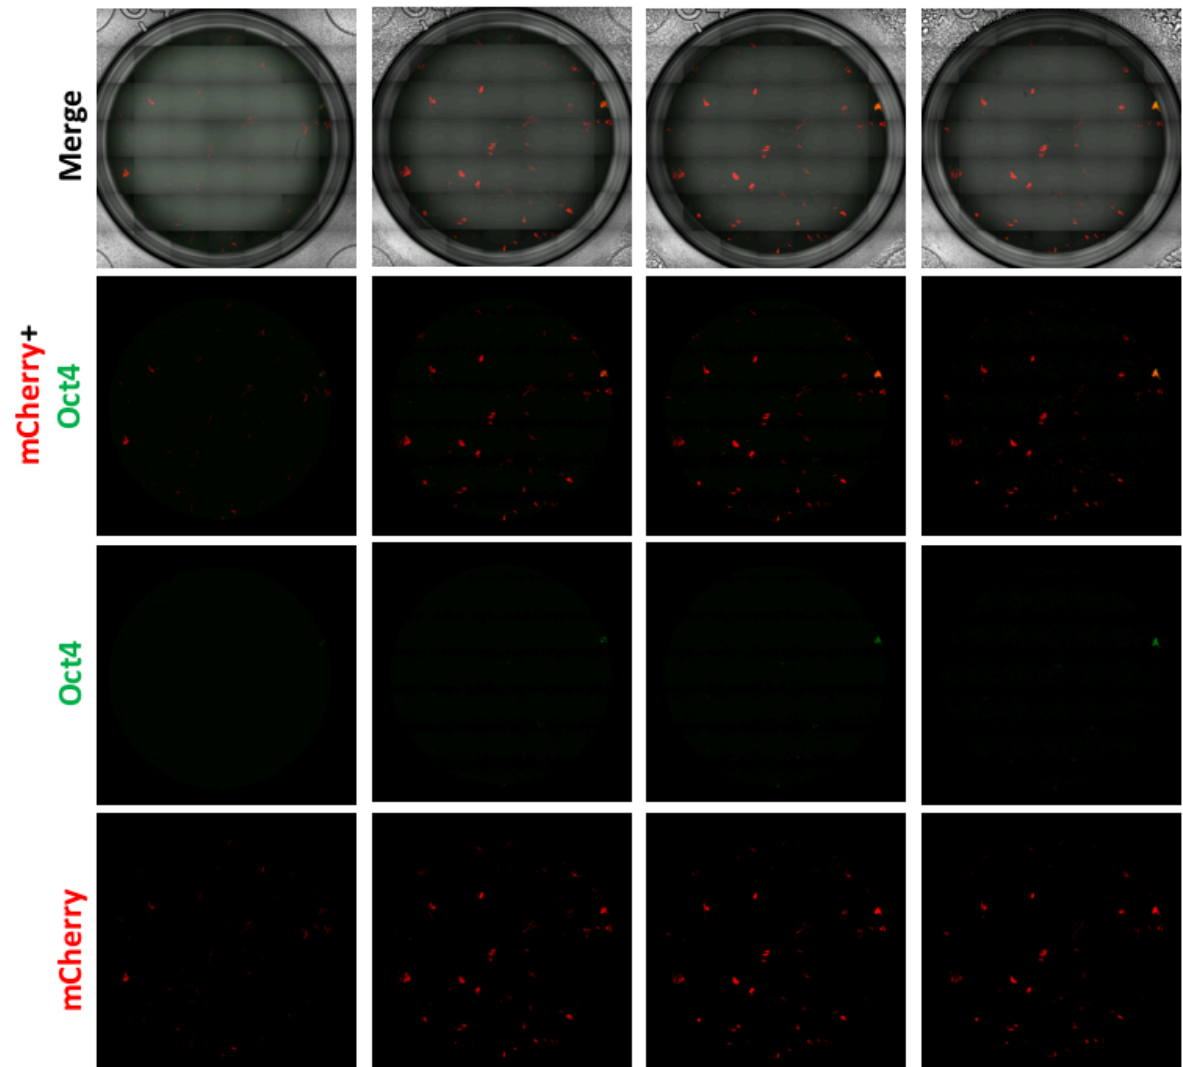

# Supplementary Figure S5

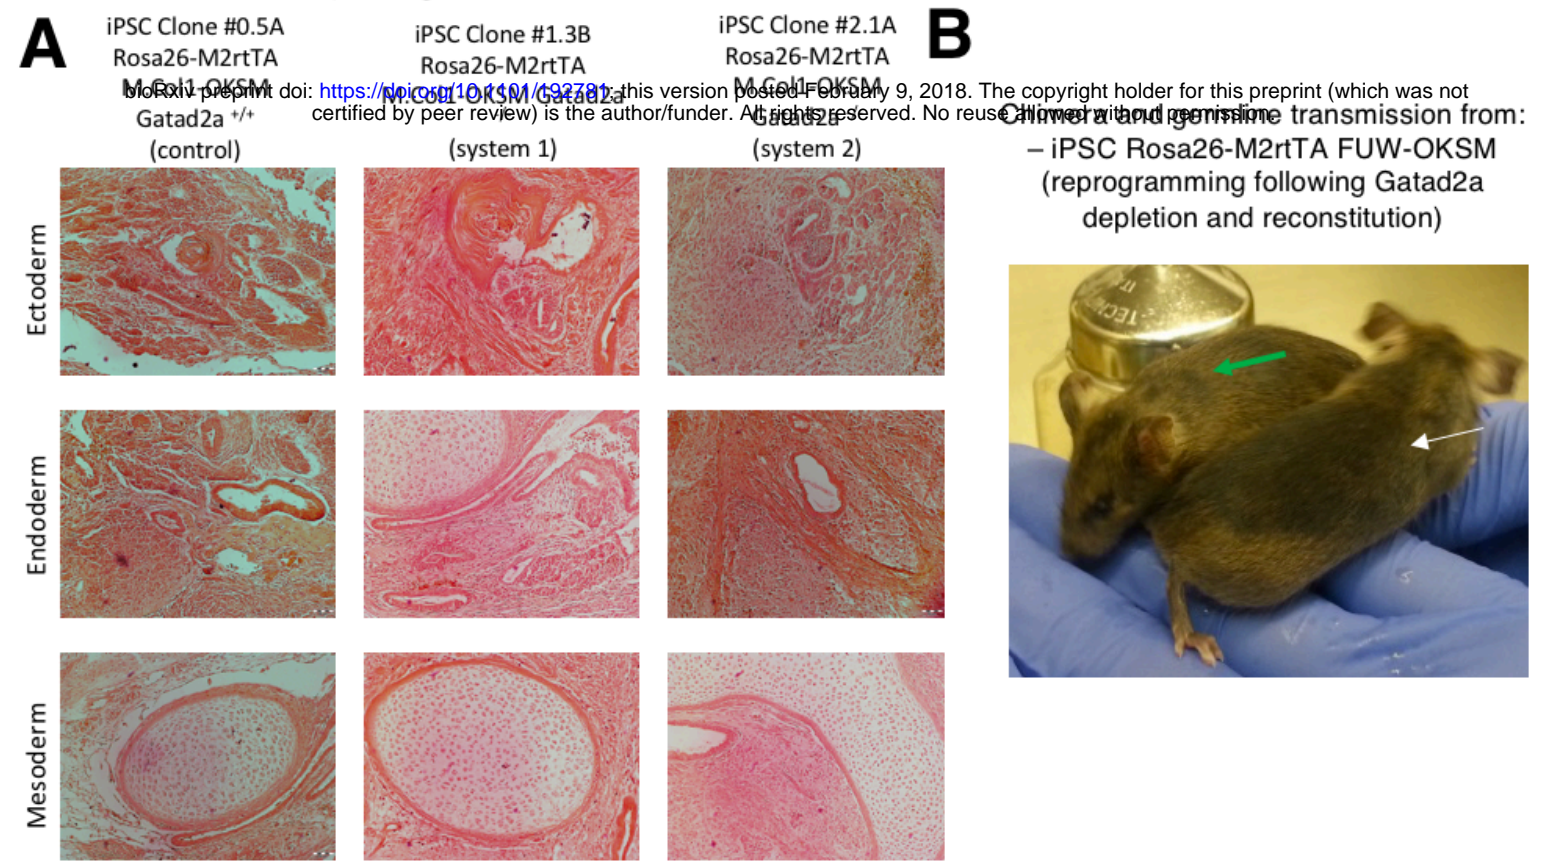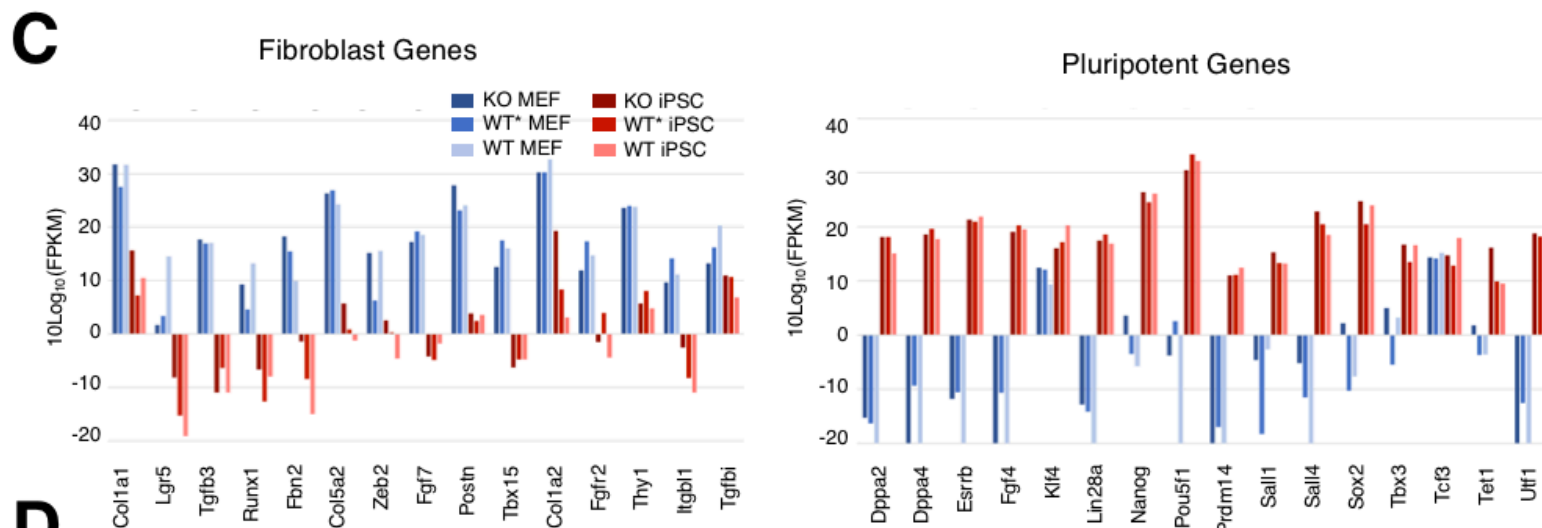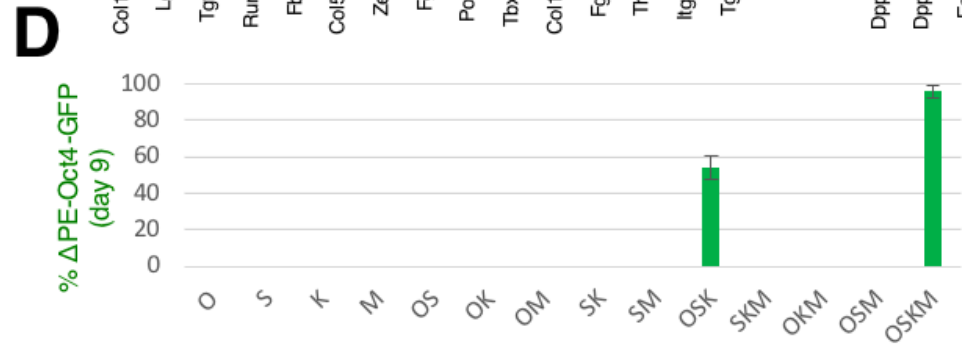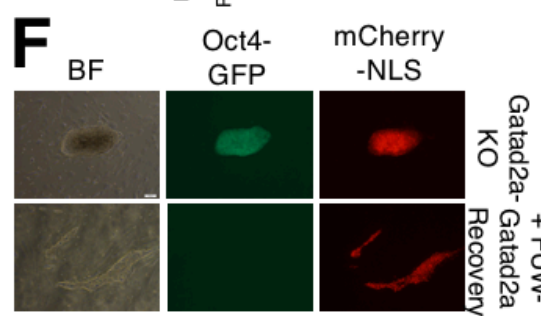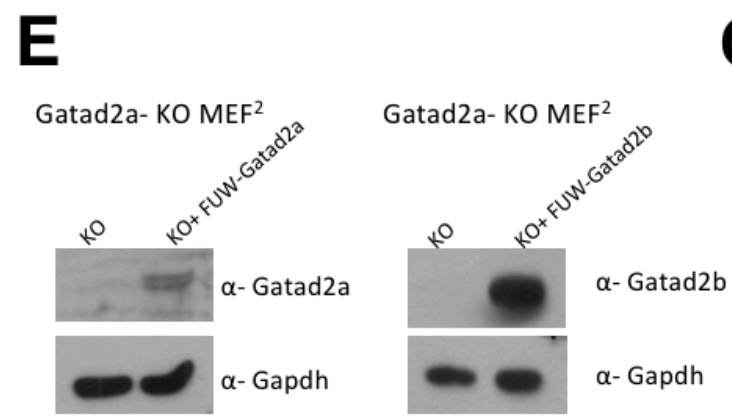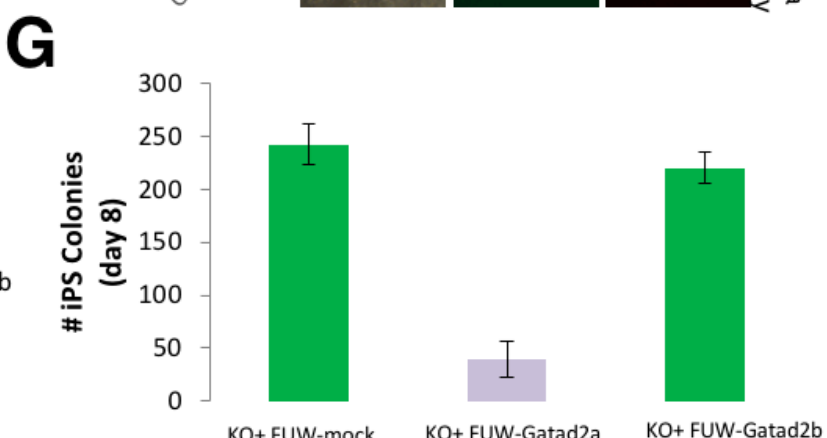

H

bioRxiv preprint doi: <https://doi.org/10.1101/192781>; this version posted February 9, 2018. The copyright holder for this preprint (which was not certified by peer review) is the author/funder. All rights reserved. No reuse allowed without permission.

(i)

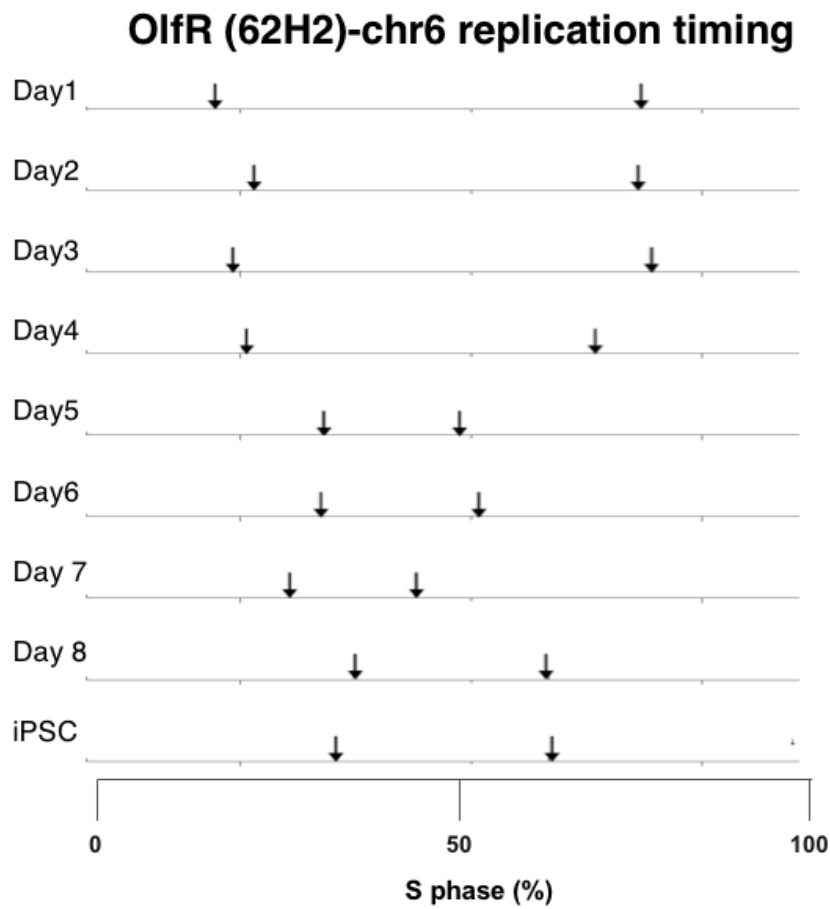

(ii)

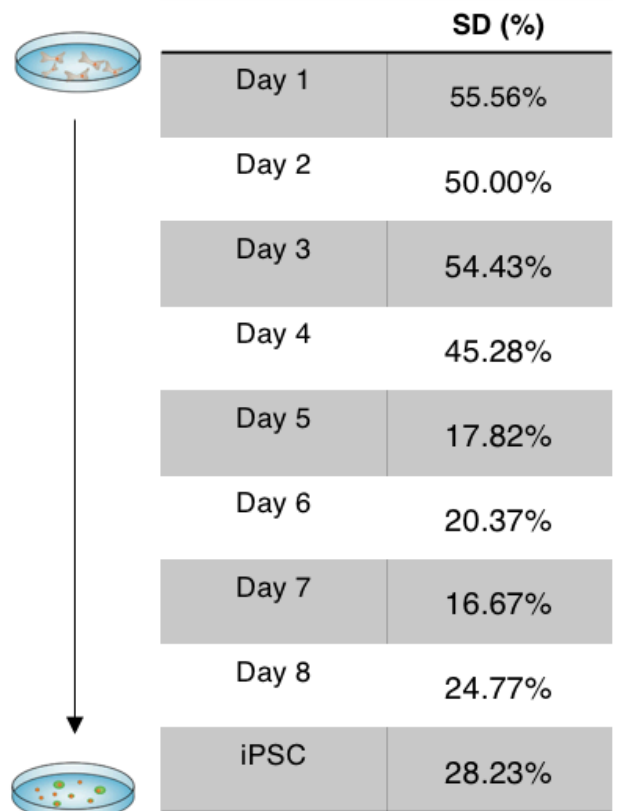

# Supplementary Figure S6

## A

### Pluripotency markers

bioRxiv preprint doi: <https://doi.org/10.1101/192781>; this version posted February 9, 2018. The copyright holder for this preprint (which was not certified by peer review) is the author/funder. All rights reserved. No reuse allowed without permission.

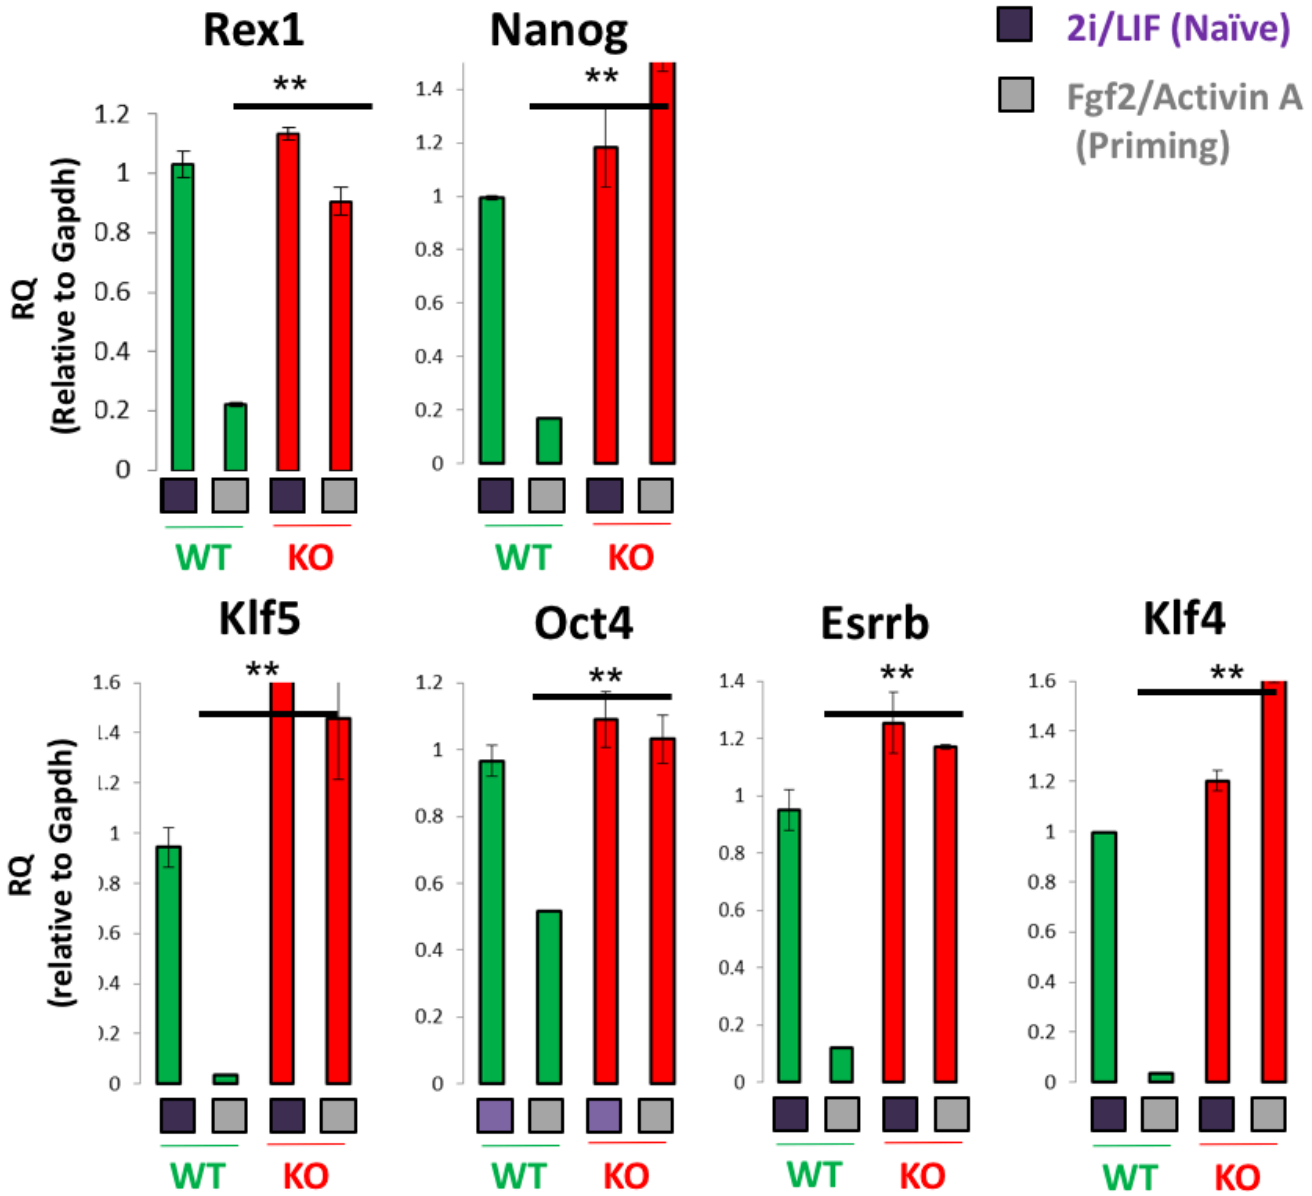

### Early development/priming markers

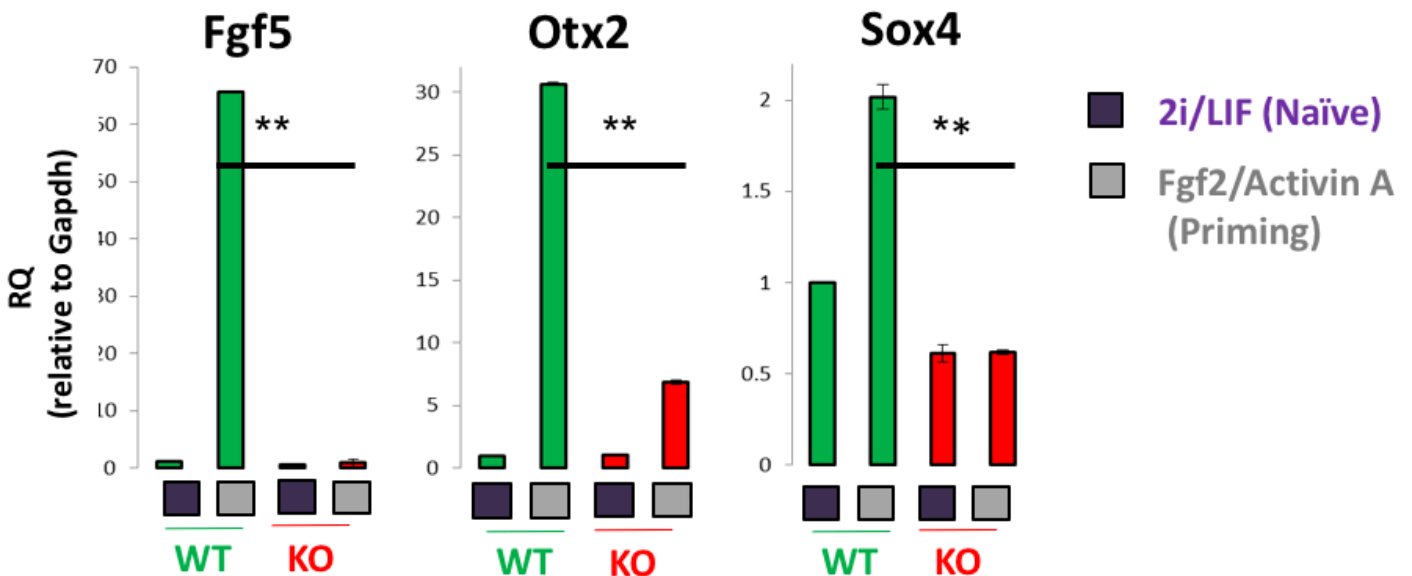

\*\* -  $P \leq 0.01$

# Supplementary Figure S6...continued

## B

bioRxiv preprint doi: <https://doi.org/10.1101/192781>; this version posted February 9, 2018. The copyright holder for this preprint (which was not certified by peer review) is the author/funder. All rights reserved. No reuse allowed without permission.

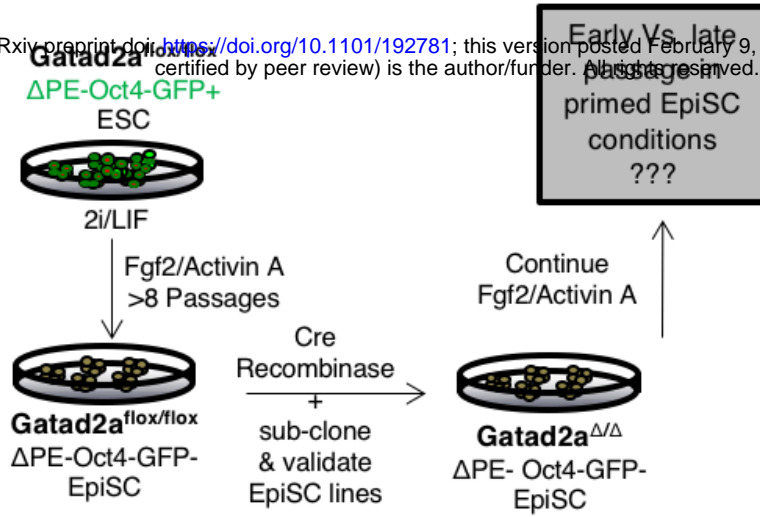

## C

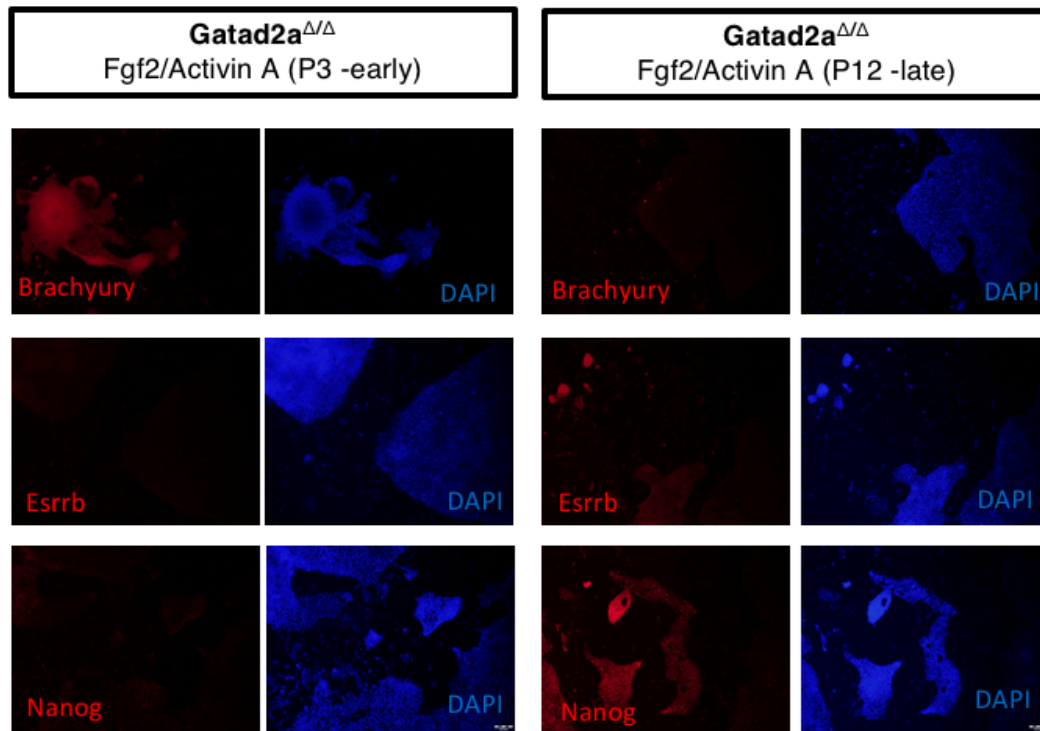

## D

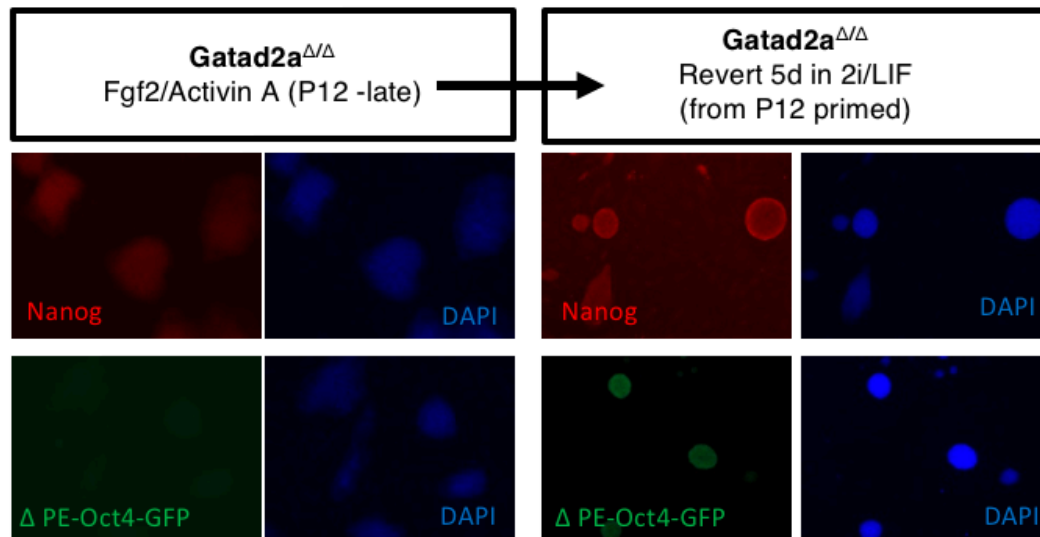

# Supplementary Figure S7

**A**

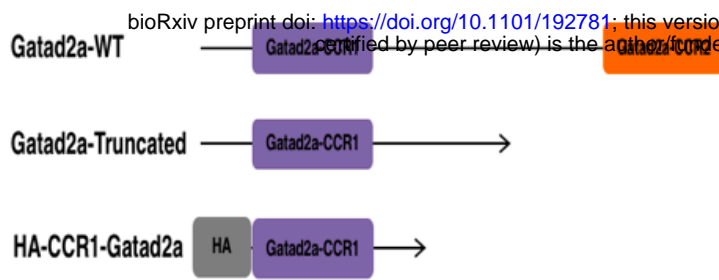

**B**

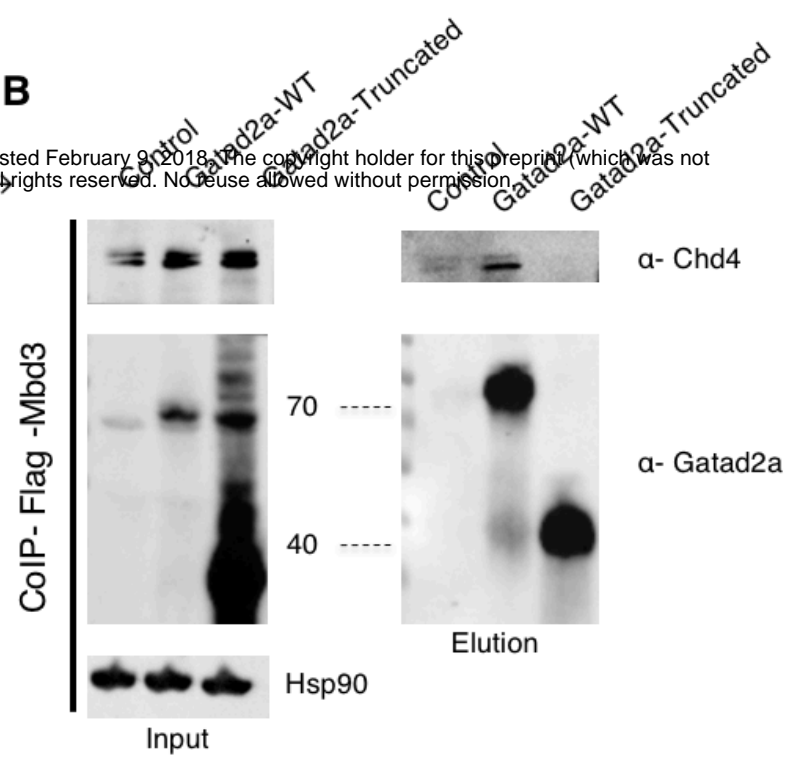

**C**

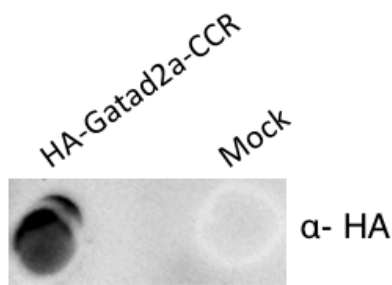

**D**

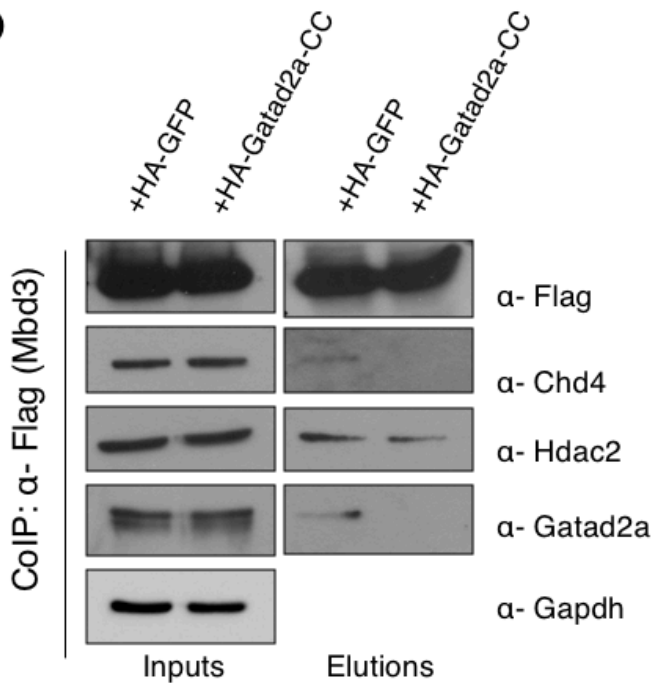

**E**

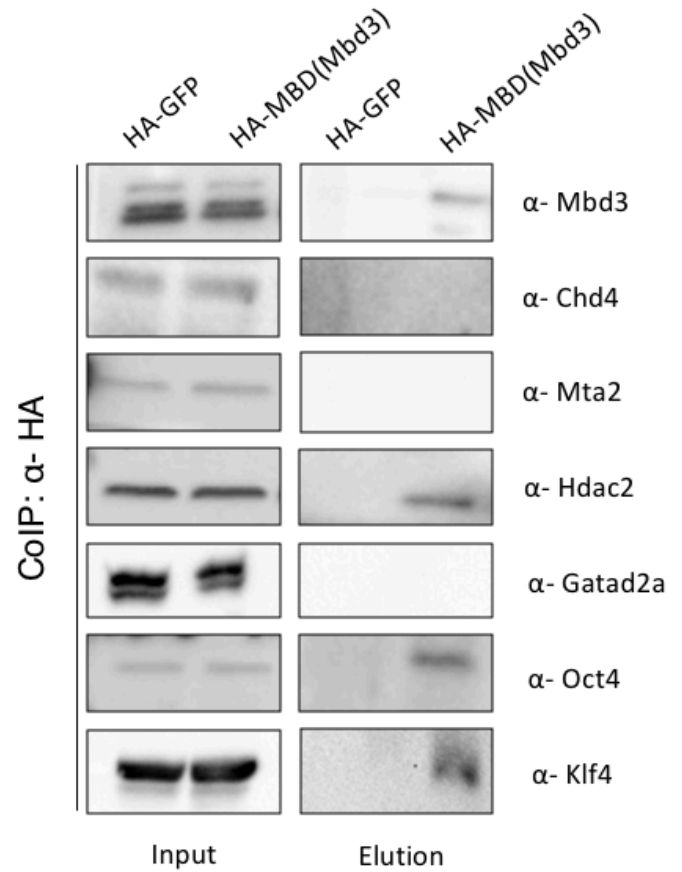

F

bioRxiv preprint doi: <https://doi.org/10.1101/192791>; this version posted February 9, 2018. The copyright holder for this preprint (which was not certified by peer review) is the author/funder. All rights reserved. No reuse allowed without permission.

### Assembled Gatad2a-Chd4-Mbd3/NuRD complex

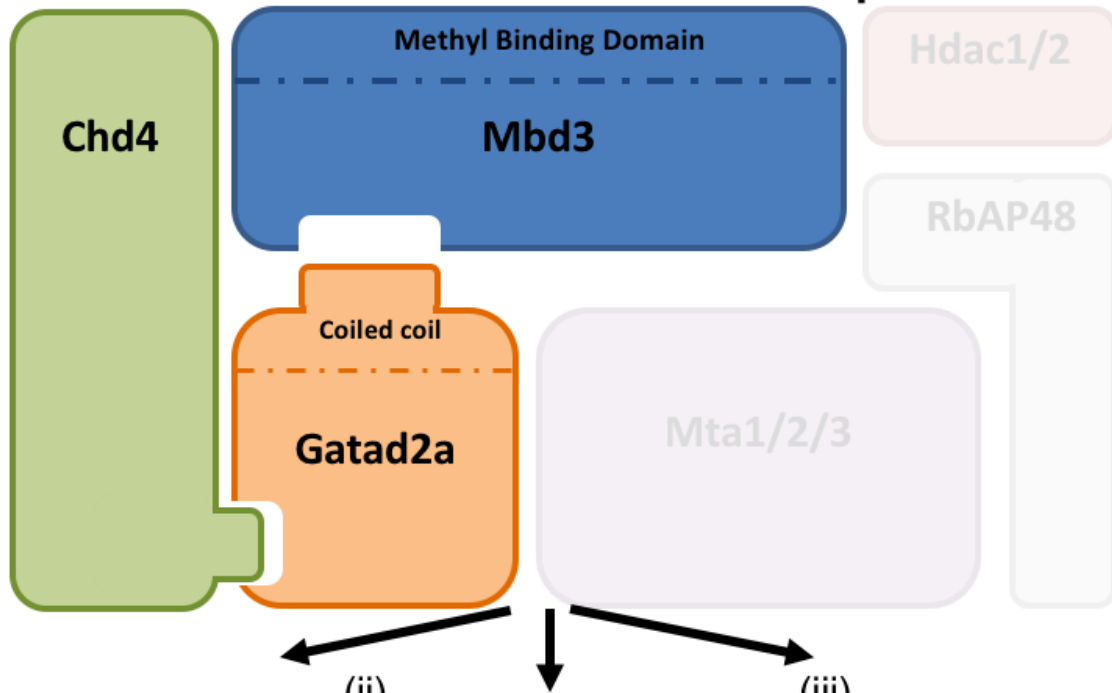

(i)

$\Delta$ CCR-Mbd3

(ii)

Gatad2a  
KD or KO

(iii)

Gatad2a-CCR peptide  
overexpression

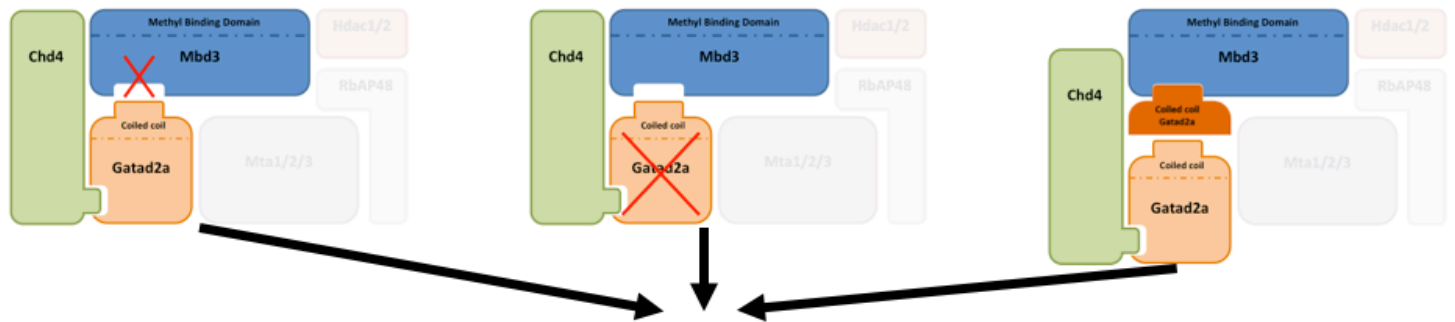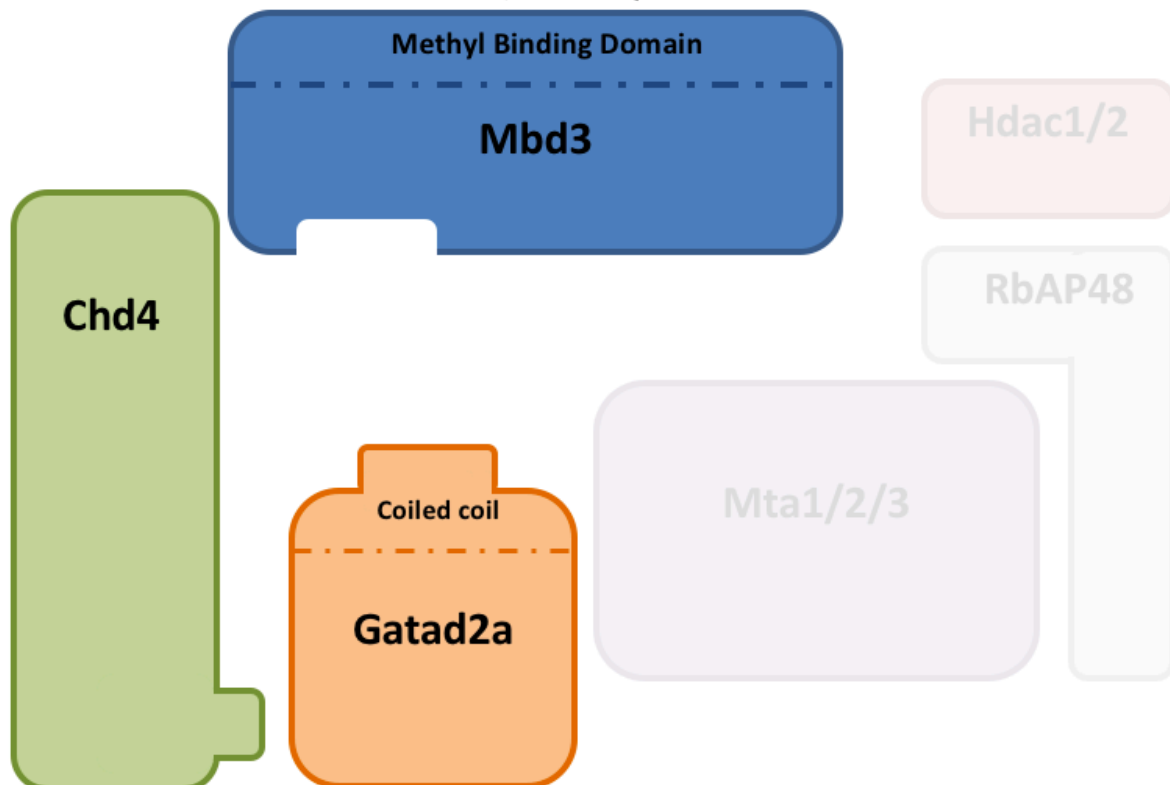

Disassembled  
Gatad2a-Chd4-Mbd3/NuRD complex

# Supplementary Figure S8

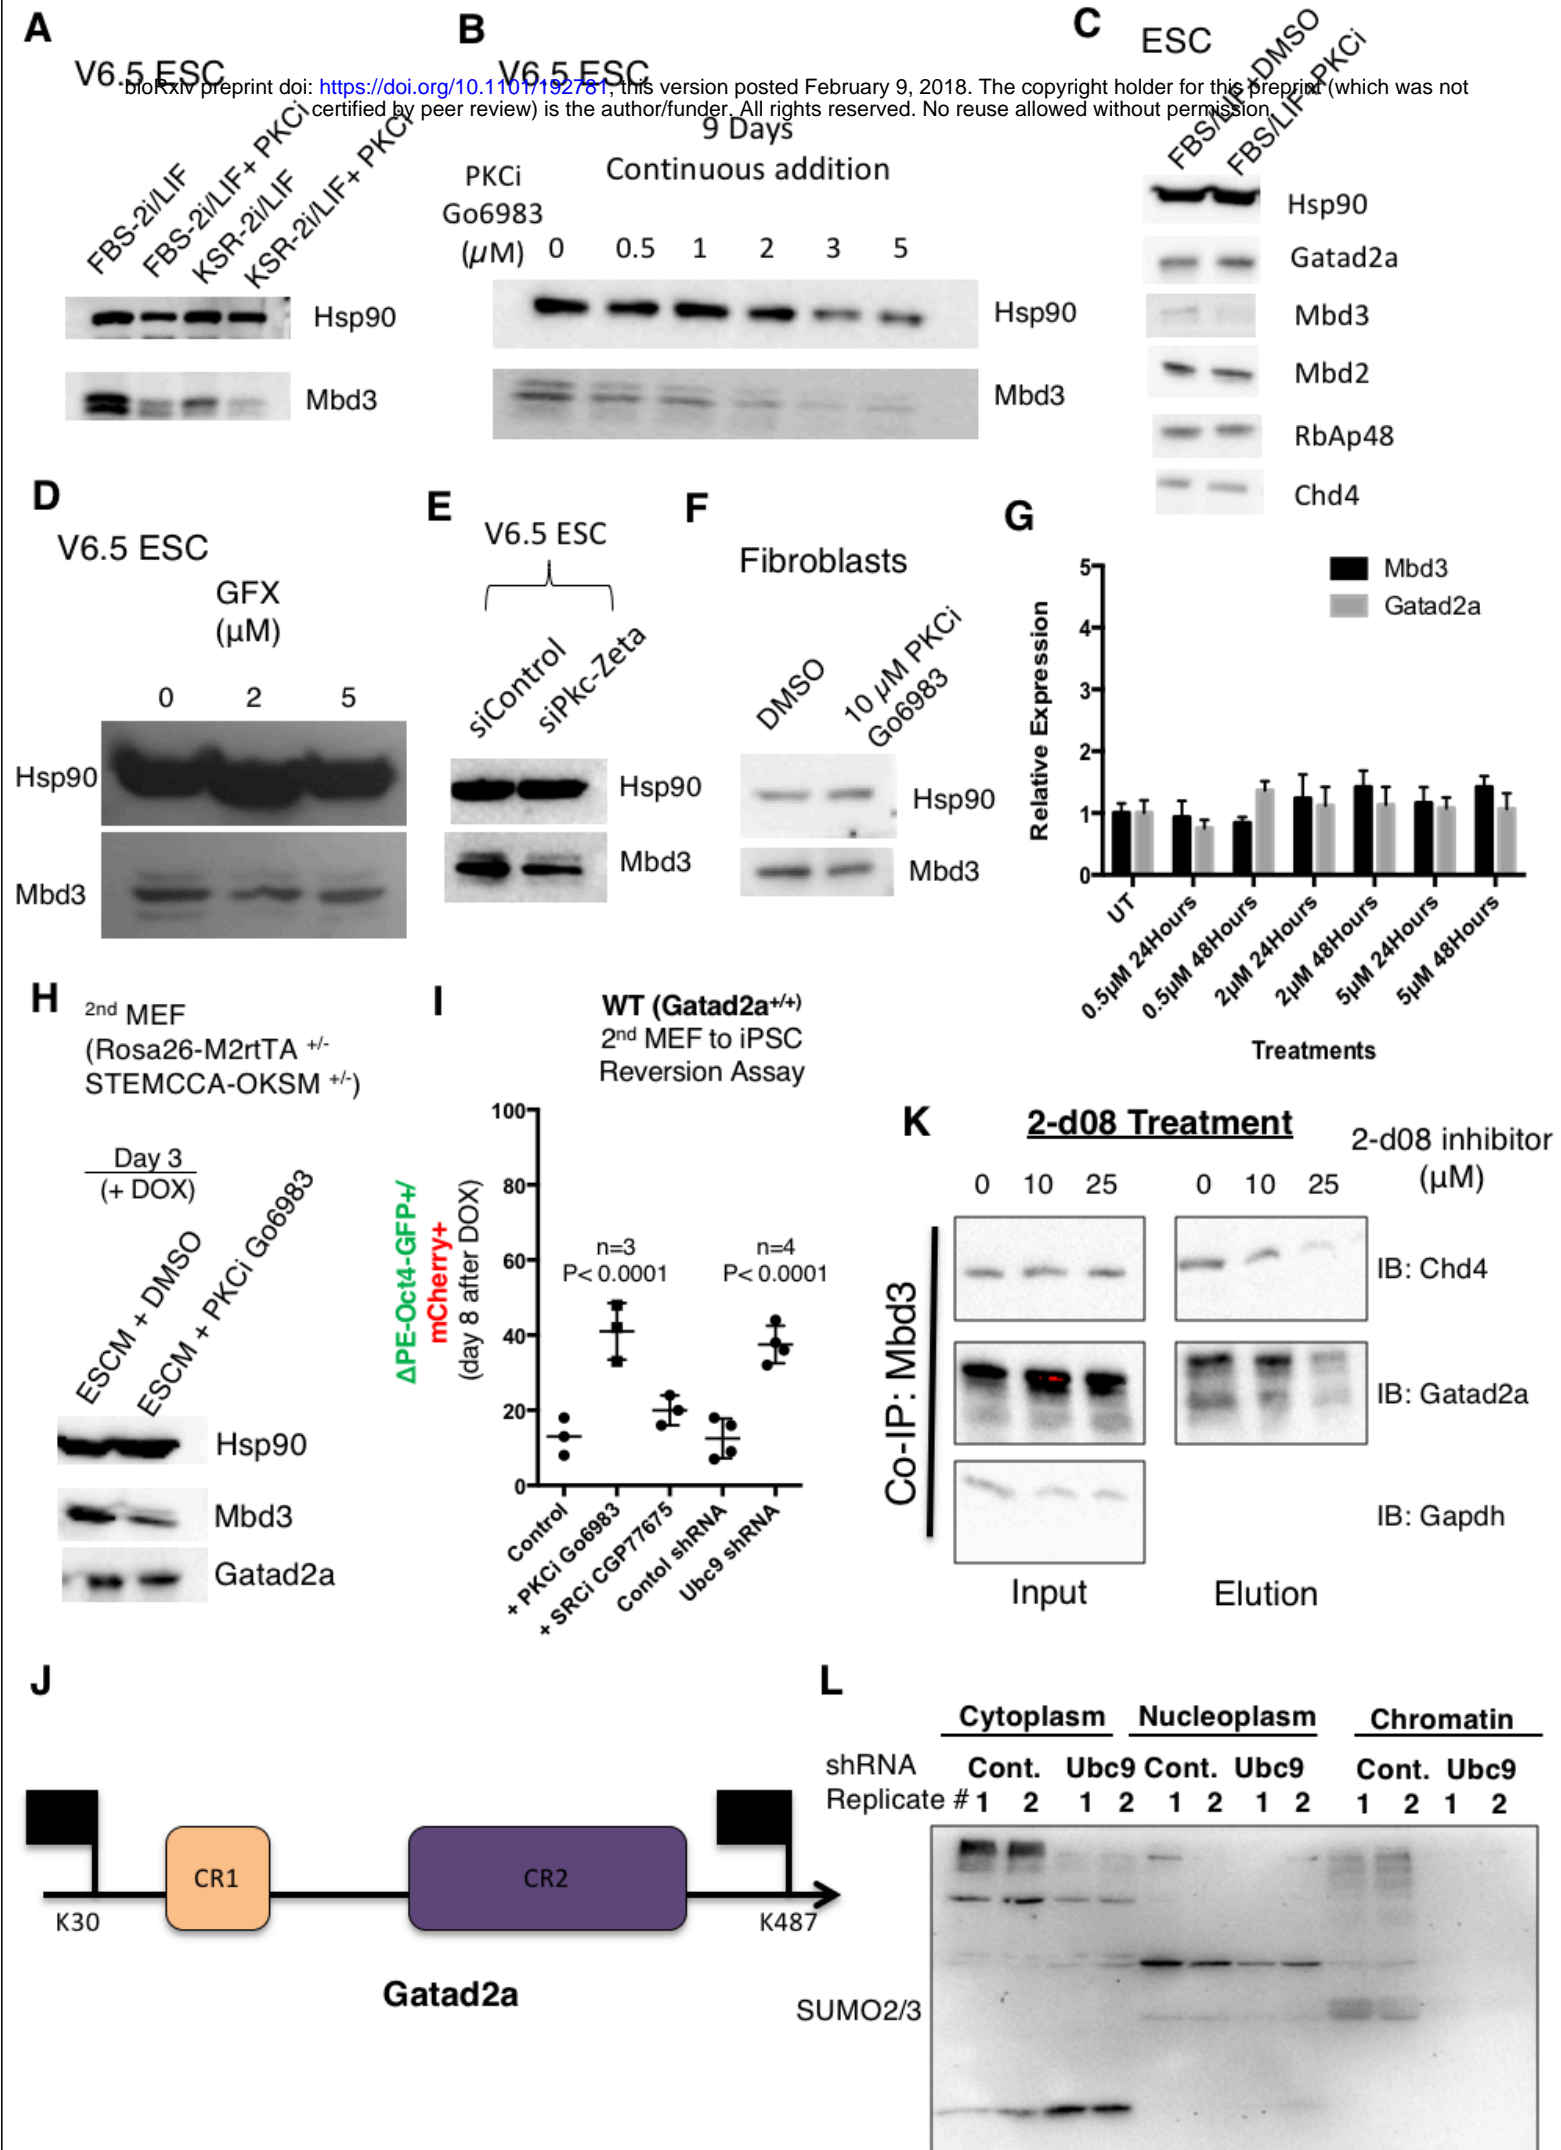

Source: https://www.biorxiv.org/content/biorxiv/early/2018/02/09/192781.full.pdf
